# Supplementary material for: Synthesis and Germination Activity of 5-(thio)phenol-3-methylfuran-2(5H)-one Analogues as Strigolactone Mimics
Source: Research Square preprint supplement (doi:10.21203/rs.3.rs-6667656/v1), 2025-05-23

Supporting Information

**Synthesis and Germination Activity of 5-(thio)phenol-3-methylfuran-2(*5H*)-one Analogues as Strigolactone Mimics**

Linfeng Kai,1 Chao Qin,1 Hongfei He,1 Qing X. Li,2 Rimao Hua, 1 Pei Lv1*

1 Department of Plant and Environmental Health, Anhui Provincial Key Laboratory of Hazardous Factors and Risk Control of Agri-food Quality Safety, Anhui Agricultural University, No. 130 Changjiang West Road, Hefei 230036, China

2 Department of Molecular Biosciences and Bioengineering, University of Hawaii at Manoa, 1955 East-West Road, Honolulu, Hawaii 96822, United States

Table of Contents

[1.General Procedures and NMR Data 1](#_Toc196731552)

[2.Biological Assay. 19](#_Toc196731553)

[3. NMR spectra 21](#_Toc196731554)

1.General Procedures and NMR Data

Synthesis of 5-hydroxy-3-methylfuran-2 (5*H*) -one (1).

A total of 10 drops of H2SO4 were added to a solution of methylmalonic acid (7.00 g, 59.3 mmol) and glyoxal (3.4 g, 59.3 mmol) in H2O (60 mL). The mixture was stirred at 110 °C for 12 h. Then, NaCl was added to the mixture to saturation at room temperature and extracted three times with EtOAc. The combined organic layers were dried over Na2SO4, filtered, and concentrated. The residue was purified by silica gel column chromatography to afford 5-hydroxy-3-methylfuran-2(5*H*)-one as a solid (3.15 g, 46%).

Synthesis of 5-hydroxy-3-methylfuran-2(5*H*)-one（2).

SOCl2 (1.2 mL, 16.5 mmol) and DMF (160 µL, 2.07 mmol) were charged in a flask. A solution of 5-hydroxy-3-methylfuran-2(5*H*)-one (3.15 g, 27.64 mmol) in a minimum amount of CH2Cl2 (4 mL) was added to the above mixture. The mixture was stirred at 90 °C for 10 min and cooled to room temperature. Then, the mixture was diluted with CH2Cl2-hexane (1:1) and quenched with sat. aq. NaHCO3 at 0 °C. The mixture was extracted three times with CH2Cl2-hexane (1:4). The combined organic layers were washed with brine, dried over Na2SO4, filtered, and concentrated. The residue was purified by silica gel column chromatography (10-20% EtOAc/hexane) to afford 5-chloro-3-methylfuran-2(*5H*)-one as a yellowish oil (1.76 g，47%).

General Procedure to Prepare novel strigolactone mimics (3a-3y).

Phenols (1.89 mmol), 4A molecular sieve (1 g), and potassium iodide (31 mg, 0.189 mmol) were added to a dry round-bottomed flask containing tetrahydrofuran (20 mL) under N2 and potassium tert-butoxide (2 mL of a 1.0 M solution in tert-butanol, 2 mmol) was introduced with cooling (ice bath) and the mixture was stirred for 10 min.Freshly compound 2 (250 mg, 1.89 mmol) was added and the reaction mixture was stirred for 3 h.Water(10 mL)was added and the product was extracted with EtOAc(25 mL) three times and dried over anhydrous Mg2SO4. The residue was purified by silica gel column chromatography to afford 3a-3y.

General Procedure to Prepare novel strigolactone mimics(4a-4i).

Thiophenols (1.89 mmol), 4A molecular sieve (1 g), and potassium iodide (31 mg, 0.189 mmol) were added to a dry round-bottomed flask containing tetrahydrofuran (20 mL) under N2 and potassium tert-butoxide (2 mL of a 1.0 M solution in tert-butanol, 2 mmol) was introduced with cooling (ice bath) and the mixture was stirred for 10 min .Freshly compound 2 (250 mg, 1.89 mmol) was added and the reaction mixture was stirred for 3 h .Water(10 mL)was added and the product was extracted with EtOAc (25 mL) three times and dried over anhydrous Mg2SO4. The residue was purified by silica gel column chromatography to afford **4a**-**4i**.

**5-hydroxy-3-methylfuran-2 (5*H*) -one** **(1):**

Rf=0.3, (PE/EA=1/5), 3.15g, 46%; m.p. 105-106 °C.

**1H NMR** (600 MHz, CDCl3)δ 6.93 – 6.81 (m, 1H), 6.13 – 6.03 (m, 1H), 1.93 (s, 3H).

**13C NMR** (150 MHz, CDCl3) δ 170.78, 145.92, 131.87, 85.21, 10.38. **HRMS** [ESI-] for C11H9ClO3[(M-H)-], m/z Calcd:114.0317; Found: 114.0315.

**5-hydroxy-3-methylfuran-2(5*H*)-one (2):**

Rf=0.3, (PE/EA=1/10), 1.76g, 47%; m.p.15-16°C.

**1H NMR** (600 MHz, CDCl3) δ 7.07 (m= 1.8 Hz, 1H), 6.53 (m= 1.7 Hz, 1H), 2.00 (s, 3H).

**13C NMR** (150 MHz, CDCl3) δ 173.04,144.86,133.50, 97.07, 10.38. **HRMS** [ESI-] for C11H9ClO3[(M-H)-], m/z Calcd:131.9978; Found: 131.9977.

**3-methyl-5-phenoxyfuran-2(5H)-one(3a):**

Rf=0.3, (PE/EA=1/10), 215mg, 91%; m.p. 132-134 °C

**1H NMR** (600 MHz, DMSO-d6) δ 7.43 – 7.35 (m, 3H), 7.11-7.16 (m = 8.1 Hz, 3H), 6.73 – 6.68 (m, 1H), 1.90 (s, 3H).

**13C NMR** (150 MHz, DMSO-d6) δ 171.37, 156.01, 144.26, 132.80, 129.82, 123.24, 116.64, 98.64, 10.16.

**HRMS** [ESI-] for C11H10O3 [(M-H)-], m/z Calcd: 109.0630; Found: 109.0633.

**5-(4-bromophenoxy)-3-methylfuran-2(5H)-one (3b):**

Rf=0.3, (PE/EA=1/10), 205mg, 95%; m.p. 147-148 °C

**1H NMR** (600 MHz, DMSO-d6) δ 7.54 (d, *J* = 11.3 Hz, 2H), 7.38 (s, 1H), 7.09 (d, *J* = 11.3 Hz, 2H), 6.68 (s, 1H), 1.88 (s, 3H).

**13C NMR** (150 MHz, DMSO-d6) δ 155.66, 144.42, 133.34, 132.94, 119.35, 115.35, 98.94, 10.55.

**HRMS** [ESI-] for C11H9BrO3 [(M-H)-], m/z Calcd: 267.9735; Found: 267.726.

**5-(4-chlorophenoxy)-3-methylfuran-2(5H)-one (3c):**

Rf=0.3, (PE/EA=1/10), 300mg, 89%; m.p. 122-123 °C

**1H NMR** (600 MHz, DMSO-d6) δ 7.41 (d, *J* = 8.8 Hz, 2H), 7.38 (s, 1H), 7.14 (d, *J* = 9.0 Hz, 2H), 6.68 (s, 1H), 1.88 (s, 3H).

**13C NMR** (150 MHz, DMSO-d6) δ 195.08, 171.61, 155.19, 144.43, 133.34, 130.02, 127.53, 118.91, 99.02, 10.55.

**HRMS** [ESI-] for C11H9ClO3 [(M-H)-], m/z Calcd: 224.0240; Found: 224.0236.

**5-(4-fluorophenoxy)-3-methylfuran-2(5H)-one (3d):**

Rf=0.3, (PE/EA=1/10), 280 mg, 90%; m.p. 133-134 °C

**1H NMR** (600 MHz, CDCl3) δ 7.12-7.08(m, 2H), 7.04-6.98(m, 2H), 6.97 (s, 1H), 6.21 (s, 1H), 2.01 (s, 3H).

**13C NMR** (150 MHz, DMSO-d6) δ 171.66,159.32, 157.74,152.59,144.50,133.30,119.06,116.71,116.55,99.61,10.52.

**HRMS** [ESI-] for C11H9FO3 [(M-H)-], m/z Calcd:208.1884; Found: 208.1885.

**methyl4-((4-methyl-5-oxo-2,5-dihydrofuran-yl)oxy)benzoate(3e):** Rf=0.3, (PE/EA=1/10), 310 mg, 89%; m.p. 112-113 °C

**1H NMR** (600 MHz, DMSO-d6) δ 7.99 (d, *J* = 8.9 Hz, 2H), 7.43 (s, 1H), 7.25 (d, *J* = 9.0 Hz, 2H), 6.84 (s, 1H), 3.84 (s, 3H), 1.92 (s, 3H).

**13C NMR** (150 MHz, DMSO-d6) δ 171.56, 166.08, 160.02, 144.36, 133.39, 131.79, 124.79, 116.69, 98.30, 52.44, 10.56.

**HRMS** [ESI-] for C13H12O5 [(M-H)-], m/z Calcd:248.0685; Found:248.0684.

**4-methyl-2-((4-methyl-5-oxo-2,5-dihydrofuran-2-** **yl)oxy)benzaldehyde (3f)**:

Rf=0.3, (PE/EA=1/15), 300 mg, 92%; m.p.115-116 °C

**1H NMR** (600 MHz, CDCl3) δ 10.21 (s, 1H), 7.53 – 7.37 (m, 1H), 7.26 (s, 1H), 7.09 (d, *J* = 7.9 Hz, 1H), 6.86 – 6.67 (m, 1H), 2.40 (s, 3H), 1.91 (s, 3H).

**13C NMR** (150 MHz, DMSO-d6) δ 171.79, 156.51, 144.71, 139.49, 133.07, 125.12, 114.66, 99.12, 21.38, 10.53.

**HRMS** [ESI-] for C13H14O3 [(M-H)-], m/z Calcd: 218.2520; Found:218.2522.

**5-(3,5-dimethylphenoxy)-3-methylfuran-2(5H)-one(3g)**:

Rf=0.3, (PE/EA=1/10), 315 mg, 94%; m.p. 125-126 °C

**1H NMR** (600 MHz, CDCl3) δ 6.95 (s, 1H), 6.80-6.70 (m, 3H), 6.26 (s, 1H), 2.30 (s, 6H), 2.00 (s, 3H).

**13C NMR** (150 MHz, DMSO-d6) δ 171.79, 156.51, 144.71, 139.49, 133.07, 125.12, 114.66, 99.12, 21.38, 10.53.

**HRMS** [ESI-] for C13H14O3[(M-H)-], m/z Calcd: 218.2520; Found:218.2522.

**3-methyl-5-(4-nitrophenoxy)furan-2(5H)-one (3h)**:

Rf=0.3, (PE/EA=1/10), 216 mg, 85%; m.p. 110-111 °C

**1H NMR** (600 MHz, DMSO-d6) δ 9.92 (s, 1H), 7.93 (d, *J* = 6.6 Hz, 2H), 7.43 (s, 1H), 7.31 (d, *J* = 8.7 Hz, 2H), 6.86 (s, 1H), 1.91 (s, 3H).

**13C NMR** (150 MHz, DMSO-d6) δ 171.40, 161.22, 144.13, 143.16, 133.60, 126.40, 117.26, 98.19, 10.58.

**HRMS** [ESI-] for C11H9NO5 [(M-H)-], m/z Calcd: 235.0481; Found: 235.0475.

**4-((4-methyl-5-oxo-2,5-dihydrofuran-2-yl)oxy)benzaldehyde(3i):** Rf=0.3, (PE/EA=1/10), 300 mg, 90%; m.p. 12-14 °C

**1H NMR** (600 MHz, DMSO-d6) δ 9.92 (d, *J* = 2.9 Hz, 1H), 7.93 (dd, *J* = 8.4, 2.9 Hz, 2H), 7.43 (s, 1H), 7.31 (dd, *J* = 8.5, 2.7 Hz, 2H), 6.86 (s, 1H), 1.91 (s, 3H).

**13C NMR** (150MHz, DMSO-d6) δ 191.98, 171.54, 160.92, 144.32, 133.46, 132.24, 132.02, 117.07, 98.18, 10.57.

**HRMS** [ESI-] for C12H10O4[(M-H)-], m/z Calcd: 218.0579; Found: 218.0573.

**3-methyl-5-(4-(trifluoromethyl )phenoxy)furan-2(5H)-one (3j)**:

Rf=0.3, (PE/EA=1/10), 263 mg, 92%; m.p. 142-143 °C

**1H NMR** (600 MHz, DMSO-d6) δ 7.76 (dd, *J* = 9.0, 2.6 Hz, 2H), 7.44 (s, 1H), 7.33 (dd, *J* = 9.1, 2.6 Hz, 2H), 6.84 (s, 1H), 1.92 (s, 3H).

**13C NMR** (150 MHz, DMSO-d6) δ 191.98, 171.54, 160.92, 144.32, 133.46, 132.24, 132.02, 117.07, 98.18, 10.57.

**HRMS** [ESI-] for C12H10O4 [(M-H)-], m/z Calcd: 218.0579; Found: 218.0573.

**3-methyl-5-(4-(methylsulfonyl)phenoxy)furan-2(5H)-one (3k)**:

Rf=0.3, (PE/EA=1/10), 356 mg, 91%; m.p. 135-136 °C

**1H NMR** (600 MHz, DMSO-d6) δ 7.94 (d, *J* = 8.7 Hz, 2H), 7.45 (s, 1H), 7.37 (d, *J* = 8.8 Hz, 2H), 6.87 (s, 1H), 3.19 (s, 3H), 1.92 (s, 3H).

**13C NMR** (151 MHz, DMSO-d6) δ 171.48, 159.95, 144.25, 135.69, 133.51, 129.83, 117.26, 98.28, 44.27, 10.57.

**HRMS** [ESI-] for C12H12O5S [(M-H)-], m/z Calcd: 268.2830; Found: 268.2825.

**5-(4-(tert-butyl)phenoxy)-3-methylfuran-2(5H)-one (3l)**:

Rf=0.3, (PE/EA=1/10), 305 mg, 91%; m.p. 141-142 °C.

**1H NMR** (600 MHz, DMSO-d6) δ 7.41 – 7.33 (m, 3H), 7.03 (d, *J* = 8.8 Hz, 2H), 6.63 (s, 1H), 1.88 (s, 3H), 1.25 (s, 9H).

**13C NMR** (150 MHz, DMSO-d6) δ 171.79, 154.23, 146.00, 144.73, 133.14, 126.79, 116.60, 99.32, 34.41, 31.71, 10.56.

**HRMS** [ESI-] for C15H18O3 [(M-H)-], m/z Calcd: 246.1256; Found: 246.1259.

**5-([1,1'-biphenyl]-4-yloxy)-3-methylfuran-2(5H)-one (3m)**:

Rf=0.3, (PE/EA=1/15), 291 mg, 89%; m.p. 135-136 °C.

**1H NMR** (600 MHz, DMSO-d6) δ 7.66 (d, *J* = 6.7 Hz, 2H), 7.62 (d, *J* = 7.8 Hz, 2H), 7.46 – 7.39 (m, 3H), 7.32 (s, 1H), 7.20 (d, *J* = 6.7 Hz, 2H), 6.74 (s, 1H), 1.90 (s, 3H).

**13C NMR** (150 MHz, DMSO-d6) δ 171.74, 155.98, 144.60, 139.88, 135.67, 133.26, 129.35, 128.45, 127.59, 126.86, 117.48, 99.05, 10.57.

**HRMS** [ESI-] for C17H14O3 [(M-H)-], m/z Calcd: 266.0943; Found: 266.0935.

**5-(3-methoxyphenoxy)-3-methylfuran-2(5H)-one (3n)**:

Rf=0.3, (PE/EA=1/10), 340 mg, 92%; m.p. 16-17 °C

**1H NMR** (600 MHz, DMSO-d6) δ 7.37 (s, 1H), 7.25 (s, 1H), 6.72-6.64 (m = 15.2, 8.8 Hz, 4H), 3.73 (s, 3H), 1.88 (s, 3H).

**13C NMR** (150 MHz, DMSO-d6) δ 171.74, 160.94, 157.53, 144.58, 133.17, 130.72, 109.31, 108.97, 103.31, 98.94, 55.74, 10.54.

**HRMS** [ESI-] for C12H12O4[(M-H)-], m/z Calcd: 220.0736; Found: 220.0725.

**3-methyl-5-(naphthalen-2-yloxy)furan-2(5H)-one (3o)**:

Rf=0.3, (PE/EA=1/10), 256 mg, 95%; m.p. 119-120 °C

**1H NMR** (600 MHz, DMSO-d6) δ 7.91 (d, *J* = 8.8 Hz, 1H), 7.89-7.83 (m, 2H), 7.61 (s, 1H),7.62-7.59 (m, 1H), 7.42 (dd, *J* = 14.3, 6.7 Hz, 2H), 7.28 (dd, *J* = 8.9, 2.6 Hz, 1H), 6.83 (s, 1H), 1.91 (s, 3H).

**13C NMR** (150 MHz, DMSO-d6) δ 171.75, 154.45, 144.64, 139.06, 133.11, 129.29, 117.04, 99.34, 27.75, 16.14, 10.50.

**HRMS** [ESI-] for C15H12O3 [(M-H)-], m/z Calcd:240.0786; Found: 240.0785.

**3-methyl-5-(pyridin-4-yloxy)furan-2(5H)-one (3p)**:

Rf=0.3, (PE/EA=1/10), 345 mg, 90%; m.p. 126-127 °C.

**1H NMR** (600 MHz, DMSO-d6) δ 7.69 (d, *J* = 7.3 Hz, 2H), 7.38 (s, 1H), 6.75 (s, 1H), 6.11 (d, *J* = 7.8 Hz, 2H), 1.93 (s, 3H).

**13C NMR** (150 MHz, DMSO-d6) δ 171.46, 143.19, 139.16, 134.89, 118.35, 90.06, 10.88.

**HRMS** [ESI-] for C10H9NO3 [(M-H)-], m/z Calcd:191.0582; Found: 191.0574.

**3-methyl-5-(p-tolyloxy)furan-2(5H)-one (3q)**:

Rf=0.3, (PE/EA=1/10), 345 mg, 92%; m.p. 120-121 °C.

**1H NMR** (600 MHz, DMSO-d6) δ 7.37 (s, 1H), 7.17 (d, *J* = 8.8 Hz, 2H), 7.01 (d, *J* = 8.7 Hz, 2H), 6.63 (s, 1H), 2.27 (s, 3H), 1.89 (s, 3H).

**13C NMR** (150 MHz, DMSO-d6) δ 171.77, 154.29, 144.66, 133.14, 132.65, 130.48, 117.07, 99.38, 20.57, 10.52.

**HRMS** [ESI-] for C12H12O3 [(M-H)-], m/z Calcd: 204.2250; Found: 204.2249.

**5-(4-ethylphenoxy)-3-methylfuran-2(5H)-one (3r)**:

Rf=0.3, (PE/EA=1/10), 293 mg, 88%; m.p. 129-130 °C

**1H NMR** (600 MHz, DMSO-d6) δ 7.38 (s, 1H), 7.20 (d, J = 8.7 Hz, 2H), 7.04 (d, J = 8.7 Hz, 2H), 6.64 (s, 1H), 2.57 (q, J = 7.6 Hz, 2H), 1.92 – 1.84 (m, 3H), 1.16 (s, 3H).

**13C NMR** (150 MHz, DMSO-d6) δ 171.75, 154.45, 144.64, 139.06, 133.11, 129.29, 117.04, 99.34, 27.75, 16.14, 10.50.

**HRMS** [ESI-] for C13H14O3 [(M-H)-], m/z Calcd: 218.0943; Found: 218.0942.

**3-methyl-5-(2,3,5-trimethylphenoxy)furan-2(5H)-one (3s)**:

Rf=0.3, (PE/EA=1/20), 369mg, 90%; m.p. 138-139 °C

**1H NMR** (600 MHz, DMSO-d6) δ 7.41 (s, 1H), 6.88 (s, 1H), 6.76 (s, 1H), 6.54 (s, 1H), 2.25 (s, 3H), 2.19 (s, 3H), 2.03 (s, 3H), 1.91 (s, 3H).

**13C NMR** (150 MHz, CDCl3) δ 171.53, 154.70, 142.56, 138.08, 136.03, 134.27, 126.03, 114.31, 100.09, 21.07,19.96, 11.60, 10.58.

**HRMS** [ESI-] for C14H16O3 [(M-H)-], m/z Calcd:232.1099; Found: 232.1088.

**5-(isoquinolin-6-yloxy)-3-methylfuran-2(5H)-one (3t)**:

Rf=0.3, (PE/EA=1/20), 288mg, 92%; m.p. 10-11 °C

**1H NMR** (600 MHz, DMSO-d6) δ 9.32 (s, 1H), 8.52 (d, *J* = 5.8 Hz, 1H), 7.88-7.82 (m, 2H), 7.70-7.64 (m, 1H), 7.58 (d, *J* = 7.7 Hz, 1H), 7.54 (s, 1H), 6.89 (s, 1H), 1.94 (s, 3H).

**13C NMR** (150 MHz, DMSO-d6) δ 171.64, 152.45, 150.98, 144.51, 143.51, 133.50, 129.45, 128.09, 122.71, 114.61, 114.24, 99.37, 10.64.

**HRMS** [ESI-] for C14H11NO3 [(M-H)-], m/z Calcd:241.0739; Found: 241.0726.

**5-(4-aminophenoxy)-3-methylfuran-2(5H)-one (3u)**:

Rf=0.3, (PE/EA=1/10),316mg, 92%; m.p. 156-157 °C

**1H NMR** (600 MHz, DMSO-d6) δ 7.29 (s, 1H), 6.79 (d, *J* = 8.8 Hz, 2H), 6.51 (d, *J* = 8.8 Hz, 2H), 6.39 (s, 1H), 4.92 (s, 2H), 1.84 (s, 3H).

**13C NMR** (150 MHz, DMSO-d6) δ 171.90, 147.18, 145.21, 144.87, 133.01, 118.96, 115.04, 100.81, 10.52.

**HRMS** [ESI-] for C11H11NO3 [(M-H)-], m/z Calcd:205.0739; Found: 250.0736.

**5-(3-chlorophenoxy)-3-methylfuran-2(5H)-one (3v)**:

Rf=0.3, (PE/EA=1/10), 239mg, 91%; m.p. 143-144 °C.

**1H NMR** (600 MHz, DMSO-d6) δ 7.43-7.38 (m, 2H), 7.24 (s, 1H), 7.19 (d, *J* = 5.7 Hz, 1H), 7.11 (d, *J* = 8.4 Hz, 1H), 6.77 (s, 1H), 1.94 – 1.89 (m, 3H).

**13C NMR** (150 MHz, CDCl3) δ171.27, 157.28, 142.21, 135.35, 134.97, 130.80,124.09,117.85,115.46,98.99, 10.87.

**HRMS** [ESI-] for C11H9ClO3 [(M-H)-], m/z Calcd:224.0240; Found: 224.0239.

**5-(3,4-dichlorophenoxy)-3-methylfuran-2(5H)-one (3w)**:

Rf=0.3, (PE/EA=1/10), 395mg, 93%; m.p. 138-139 °C.

**1H NMR** (600 MHz, DMSO-d6) δ 7.61 (dd, *J* = 8.8, 3.0 Hz, 1H), 7.44 (d, *J* = 3.0 Hz, 1H), 7.41 – 7.36 (m, 1H), 7.14 (dd, *J* = 8.9, 3.0 Hz, 1H), 6.82 – 6.69 (m, 1H), 1.91 – 1.83 (m, 3H).

**13C NMR** (150 MHz, CDCl3) δ 170.81, 155.23, 141.71, 134.87, 133.21, 130.91, 127.25, 119.17, 116.69, 98.78, 10.59.

**HRMS** [ESI-] for C11H8Cl2O3 [(M-H)-], m/z Calcd:257.9850; Found: 257.9843.

**5-(3,5-dichlorophenoxy)-3-methylfuran-2(5H)-one (3x)**:

Rf=0.3, (PE/EA=1/10), 321mg, 93%; m.p. 147-149 °C.

**1H NMR** (600 MHz, DMSO-d6) δ 7.39 (s, 1H), 7.34 (s, 1H), 7.23 (d, *J* = 1.9 Hz, 2H), 6.80 (s, 1H), 1.89 (s, 3H).

**13C NMR** (150 MHz, DMSO-d6) δ 171.38, 157.53, 144.07, 135.20, 133.56, 123.38, 116.28, 98.55, 10.54.

**HRMS** [ESI-] for C11H8Cl2O3 [(M-H)-], m/z Calcd:257.9850; Found: 257.9839.

**5-(2,3-dichlorophenoxy)-3-methylfuran-2(5H)-one (3y)**:

Rf=0.3, (PE/EA=1/10), 253mg, 95%; m.p. 120-121 °C.

**1H NMR** (600 MHz, DMSO-d6) δ 7.44 (s, 1H), 7.41-7.37 (m, 3H), 6.77 (s, 1H), 1.91 (s, 3H).

**13C NMR** (150 MHz, CDCl3) δ 170.80, 153.39, 141.73, 134.99, 134.07, 127.62, 125.66, 123.77, 116.75, 99.59, 10.58.

**HRMS** [ESI-] for C11H8Cl2O3 [(M-H)-], m/z Calcd:257.9850; Found: 257.9853.

**5-((4-fluorophenyl)thio)-3-methylfuran-2(5H)-one (4a)**:

Rf=0.3, (PE/EA=1/20),3 26mg, 85%; m.p. 125-126 °C.

**1H NMR** (600 MHz, CDCl3) δ 7.53-7.49 (m, 2H), 7.05-7.01 (m, 2H), 6.94-6.92(m, 1H), 6.04-6.02 (m, 1H), 1.82 (s, 3H).

**13C NMR** (150 MHz, CDCl3) δ 172.45, 164.32, 162.66, 144.72, 136.85, 136.79, 132.12, 124.76, 116.35, 85.60, 10.37.

**HRMS** [ESI-] for C11H9FO2S [(M-H)-], m/z Calcd:224.0307; Found: 224.0301.

**5-((4-bromophenyl)thio)-3-methylfuran-2(5H)-one (4b)**:

Rf=0.3, (PE/EA=1/20), 363mg, 82%; m.p. 118-119 °C.

**1H NMR** (600 MHz, CDCl3) δ 7.43 (d, *J* = 8.8 Hz, 2H), 6.94-6.90 (m, 1H), 6.84 (d, *J* = 8.8 Hz, 2H), 6.01-5.97 (m, 1H), 3.80 (s, 3H), 1.79 (s, 3H).

**13C NMR** (150 MHz, CDCl3) δ 172.37, 144.45, 135.37, 132.42, 132.30, 129.32, 123.64, 85.41, 10.46.

**HRMS** [ESI-] for C11H9BrO2S [(M-H)-], m/z Calcd:285.1550; Found: 285.1543.

**3-methyl-5-(m-tolylthio)furan-2(5H)-one (4c)**:

Rf=0.3, (PE/EA=1/20), 312mg, 88%; m.p. 14-15 °C.

**1H NMR** (600 MHz, CDCl3) δ 7.56 (d, *J* = 7.3 Hz, 1H), 7.25 – 7.21 (m, 2H), 7.19-7.15 (m, 1H),6.99-6.95 (m, 1H), 6.10-6.06 (m, 1H), 2.46 (s, 3H), 1.84 (s, 3H).

**13C NMR** (150 MHz, CDCl3) δ 172.61, 144.68, 141.22, 134.89, 131.84, 130.62, 129.70, 129.15, 126.68, 85.80, 21.04, 10.45.

**HRMS** [ESI-] for C12H12O2S [(M-H)-], m/z Calcd:220.0558; Found: 220.0549.

**5-((4-methoxyphenyl)thio)-3-methylfuran-2(5H)-one (4d)**:

Rf=0.3, (PE/EA=1/20), 356mg, 89%; m.p. 123-124 °C.

**1H NMR** (600 MHz, CDCl3) δ 7.44-7.41 (m, 2H), 6.91 (p, *J* = 1.6 Hz, 1H), 6.86-6.82 (m, 2H), 5.99 (p, *J* = 1.9 Hz, 1H), 3.80 (s, 3H), 1.79 (t, *J* = 1.8 Hz, 3H).

**13C NMR** (150 MHz, CDCl3) δ 172.72, 160.74, 145.13, 136.90, 131.65, 119.61, 114.61,85.93,55.34,10.35.

**HRMS** [ESI-] for C12H12O3S [(M-H)-], m/z Calcd:236.0507; Found: 236.0493.

**5-((4-(tert-butyl)phenyl)thio)-3-methylfuran-2(5H)-one (4e)**:

Rf=0.3, (PE/EA=1/20), 413mg, 81%; m.p. 135-136 °C.

**1H NMR** (600 MHz, CDCl3) δ 7.45 (d, *J* = 8.5 Hz, 2H), 7.35 (d, *J* = 8.7 Hz, 2H), 6.96-6.92 (m, 1H), 6.09-6.05 (m, 1H), 1.81 (s, 3H), 1.30 (s, 9H).

**13C NMR** (150 MHz, CDCl3) δ 172.69, 152.53, 144.87, 133.70, 131.83, 126.57, 126.15, 85.98, 34.66, 31.16, 10.35.

**HRMS** [ESI-] for C15H18O2S [(M-H)-], m/z Calcd:262.1028; Found: 262.1019.

**3-methyl-5-(naphthalen-2-ylthio)furan-2(5H)-one (4f)**:

Rf=0.3, (PE/EA=1/20), 396mg, 90%; m.p. 124-125 °C.

**1H NMR** (600 MHz, CDCl3) δ 8.05 (s, 1H), 7.84-7.78 (m, 3H), 7.56 (dd, *J* = 8.5, 1.9 Hz, 1H),7.54-7.79 (m, 2H), 7.03-6.98 (m, 1H), 6.21-6.17 (m, 1H), 1.82 (s, 3H).

**13C NMR** (150 MHz, CDCl3) δ 172.63, 144.72, 133.47, 133.24, 133.01, 132.16, 130.24, 128.77, 127.79, 127.75, 127.71, 126.97, 126.79, 85.99, 10.43.

**HRMS** [ESI-] for C15H18O2S [(M-H)-], m/z Calcd:256.0558; Found: 256.0846.

**5-((4-chlorophenyl)thio)-3-methylfuran-2(5H)-one (4g)**:

Rf=0.3, (PE/EA=1/20), 360mg, 88%; m.p. 147-148 °C.

**1H NMR** (600 MHz, CDCl3) δ 7.46 (d, *J* = 8.5 Hz, 2H), 7.31 (d, *J* = 8.5 Hz, 2H), 6.97-6.94 (m, 1H), 6.09-6.04 (m, 1H), 1.86 (s, 3H).

**13C NMR** (150 MHz, CDCl3) δ 172.38, 144.51, 135.52, 135.08, 132.35, 129.33, 128.56, 85.48, 10.43.

**HRMS** [ESI-] for C11H9O2S [(M-H)-], m/z Calcd:240.0012; Found: 240.0003.

**5-((3,5-dimethylphenyl)thio)-3-methylfuran-2(5H)-one (4h)**:

Rf=0.3, (PE/EA=1/30), 313mg, 85%; m.p. 124-125 °C.

**1H NMR** (600 MHz, CDCl3) δ 7.39 (s, 1H), 7.11 (d, *J* = 7.7 Hz, 1H), 7.05 (dd, *J* = 7.8, 1.8 Hz, 1H), 7.01-6.97 (m, 1H), 6.11-6.07 (m, 1H), 2.41 (s, 3H), 2.30 (s, 3H), 1.86 (s, 3H).

**13C NMR** (150 MHz, CDCl3) δ 172.68, 144.68, 137.78, 136.41, 135.11, 131.84, 130.37, 129.55, 85.97, 20.72, 20.50, 10.42.

**HRMS** [ESI-] for C13H14O2S [(M-H)-], m/z Calcd:234.0715; Found: 234.0709.

**5-((4-isopropylphenyl)thio)-3-methylfuran-2(5H)-one (4i)**:

Rf=0.3, (PE/EA=1/30), 296mg, 95%; m.p. 5-6 °C.

**1H NMR** (600 MHz, CDCl3) δ 7.44 (d, *J* = 6.5 Hz, 2H), 7.19 (d, *J* = 8.2 Hz, 2H), 6.95-6.91 (m, 1H), 6.07-6.03 (m, 1H),2.93-2.88 (m, 1H), 1.81 (s, 3H), 1.23 (d, *J* = 5.1 Hz, 6H).

**13C NMR** (150 MHz, CDCl3) δ 172.71, 150.29, 144.92, 134.40, 131.81, 127.26, 126.71, 85.98, 33.84, 23.59, 10.35.

**HRMS** [ESI-] for C12H12O5S[(M-H)-], m/z Calcd:268.0405; Found: 268.0394.

2.Biological Assay.

Promotion germination activity. Emulsions of GR-24 and the target compounds were prepared as follows: 10 mg of these materials were weighed and dissolved in DMSO-D6 (100 μL), Tween-80 (100 μL) was added and then added to 10 mL of medium-pure water, and the control group is a mixture containing the same amount of DMSO-D6, Tween-80, and water, with pure water as the blank control. Seeds of corn, sorghum, sunflower and soybean were surface sterilized by soaking in 1% NaClO for 2 min and 75% alcohol for 2 min, rinsed thoroughly with sterilized deionized water, and dried naturally. In each 9-cm Petri dish, 15 seeds of corn, sorghum, sunflower and soybean were placed in on double filter paper and delivered 1 mL of each concentration of the substance to be tested. The petri dishes were placed in a constant temperature incubator and the seeds were allowed to grow at 24 °C with a photoperiod of 12 h for 3 d. Ten plants to be tested were randomly selected from each petri dish. Root and bud lengths were measured and mean values were calculated. Each experiment was repeated three times. The rate (%) on length promotion in these tests is expressed as:

growth promotion rate (%)

Where growth promotion rate (%) indicates the percentage of root and bud growth promotion rate compared to the control, greater than 0 indicates growth promotion, less than 0 indicates growth inhibition, and equal to 0 indicates no rate.

Dose effect of target compounds on Corn Plants. Emulsions of target compounds and GR24 at concentrations of 100, 50, 10, 1, 0.1 and 0.01 mg/L were prepared according to the above procedure. The control group is a mixture containing the same amount of DMSO-d6, Tween-80, and water, with pure water as the blank control. The rate of each concentration on the promotion of root length and bud length of corn was tested according to the Petri dish bioassay method described above, and each experiment was repeated three times. The growth promotion rate (%) on length promotion in these tests is expressed as the formula above.

Growth promotion rate of target compounds on Corn Plants. The mechanism of action was investigated using 3s and 4h to promote plant height, aboveground biomass, and belowground biomass of corn. In the growth experiment, 2 kg of nutrient soil moistened with water was added to an experimental pot with a diameter of 15.5 cm. Then 10 corn seeds in the same growth state were sown at a depth of 2 cm and cultivated in a greenhouse. The compounds an above method were configured to 10 mg/L concentration, and the content of DMF and Tween-80 in the solution was 1%. The compounds were applied directly after sowing. Apply a mixture containing the same amount of DMF, water and Tween-80 as a control, with pure water as a blank control. The mixtures were sprayed at 7 d intervals during subsequent growth. After 21 d, the plant height, aboveground biomass, and belowground biomass of each pot of corn plants were determined determine its growth promotion rate. Each experiment was repeated three times. The growth promotion rate (%) on corn plant height in these tests is expressed as:

Biomass promoting rate（%）on corn in these tests is expressed as:

Where growth promotion rate (%) indicates the percentage of root and bud growth promotion rate compared to the control, greater than 0 indicates growth promotion, less than 0 indicates growth inhibition, and equal to 0 indicates no rate.

**3.** **NMR spectra**

**1H NMR of Intermediate 1**

**
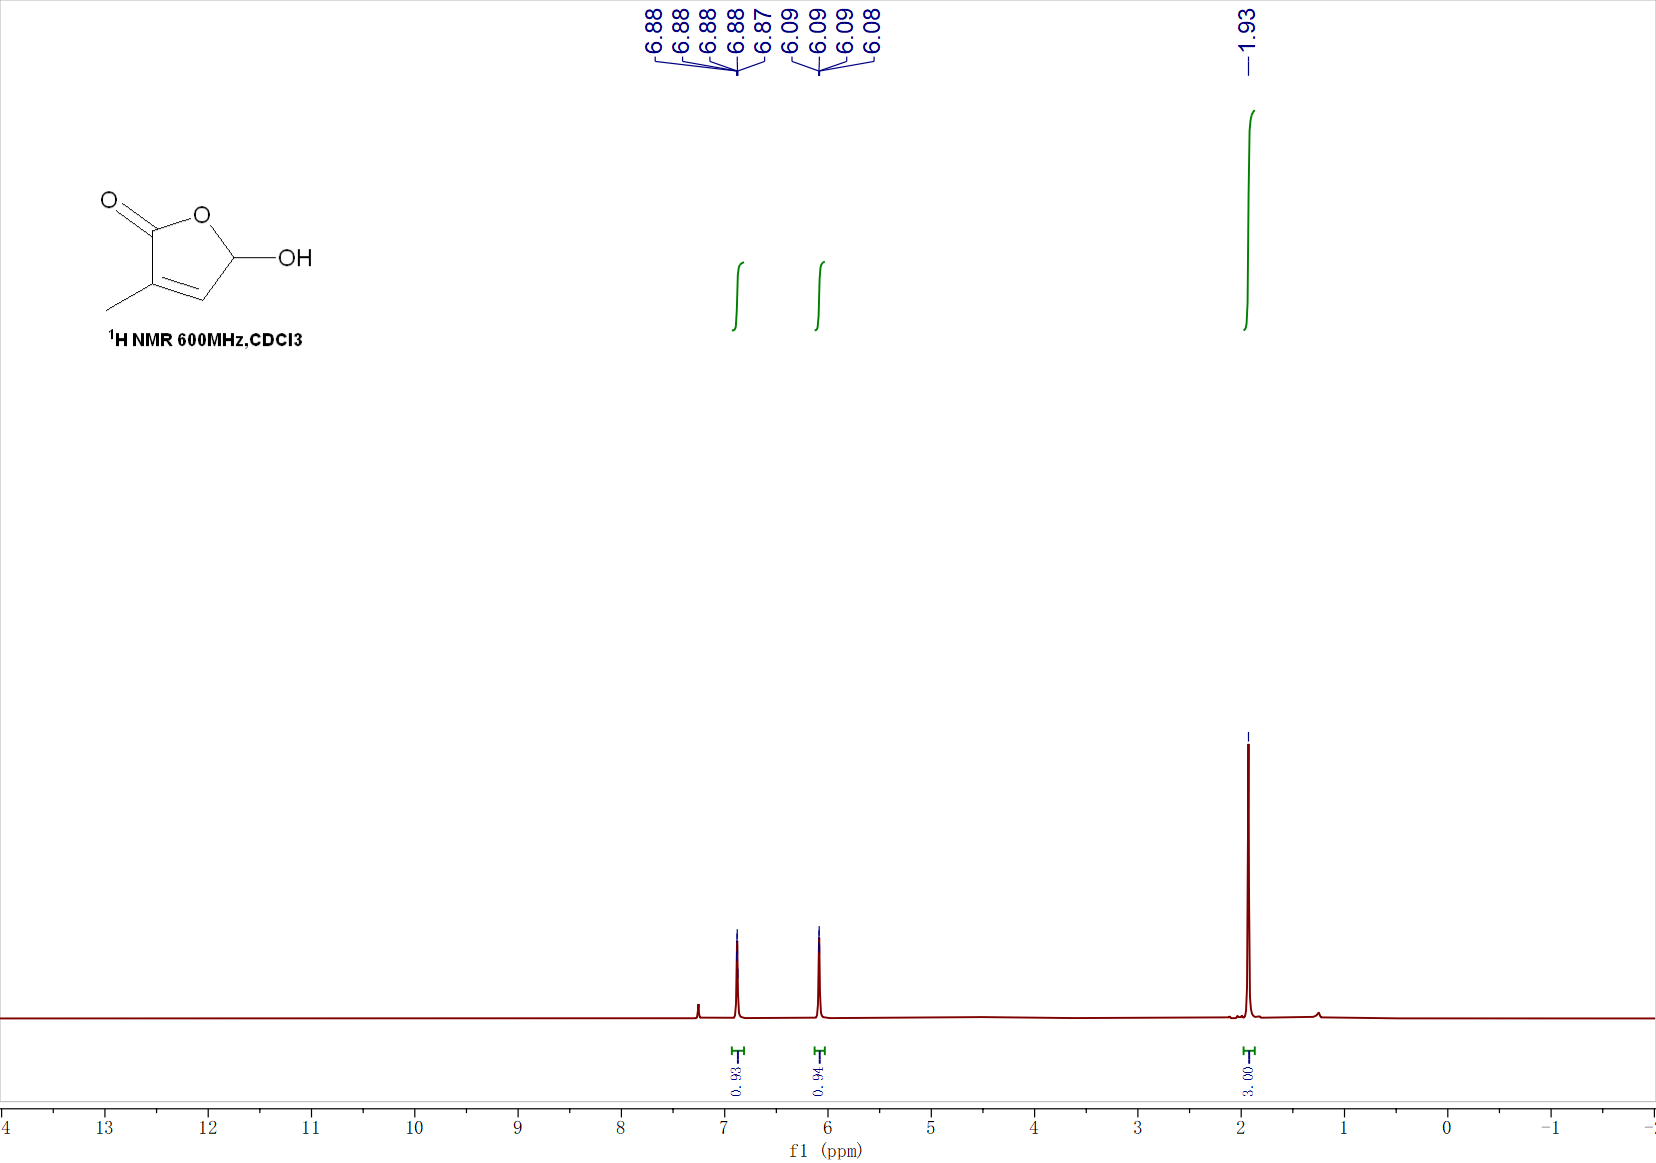
**

**13C NMR of Intermediate 1**


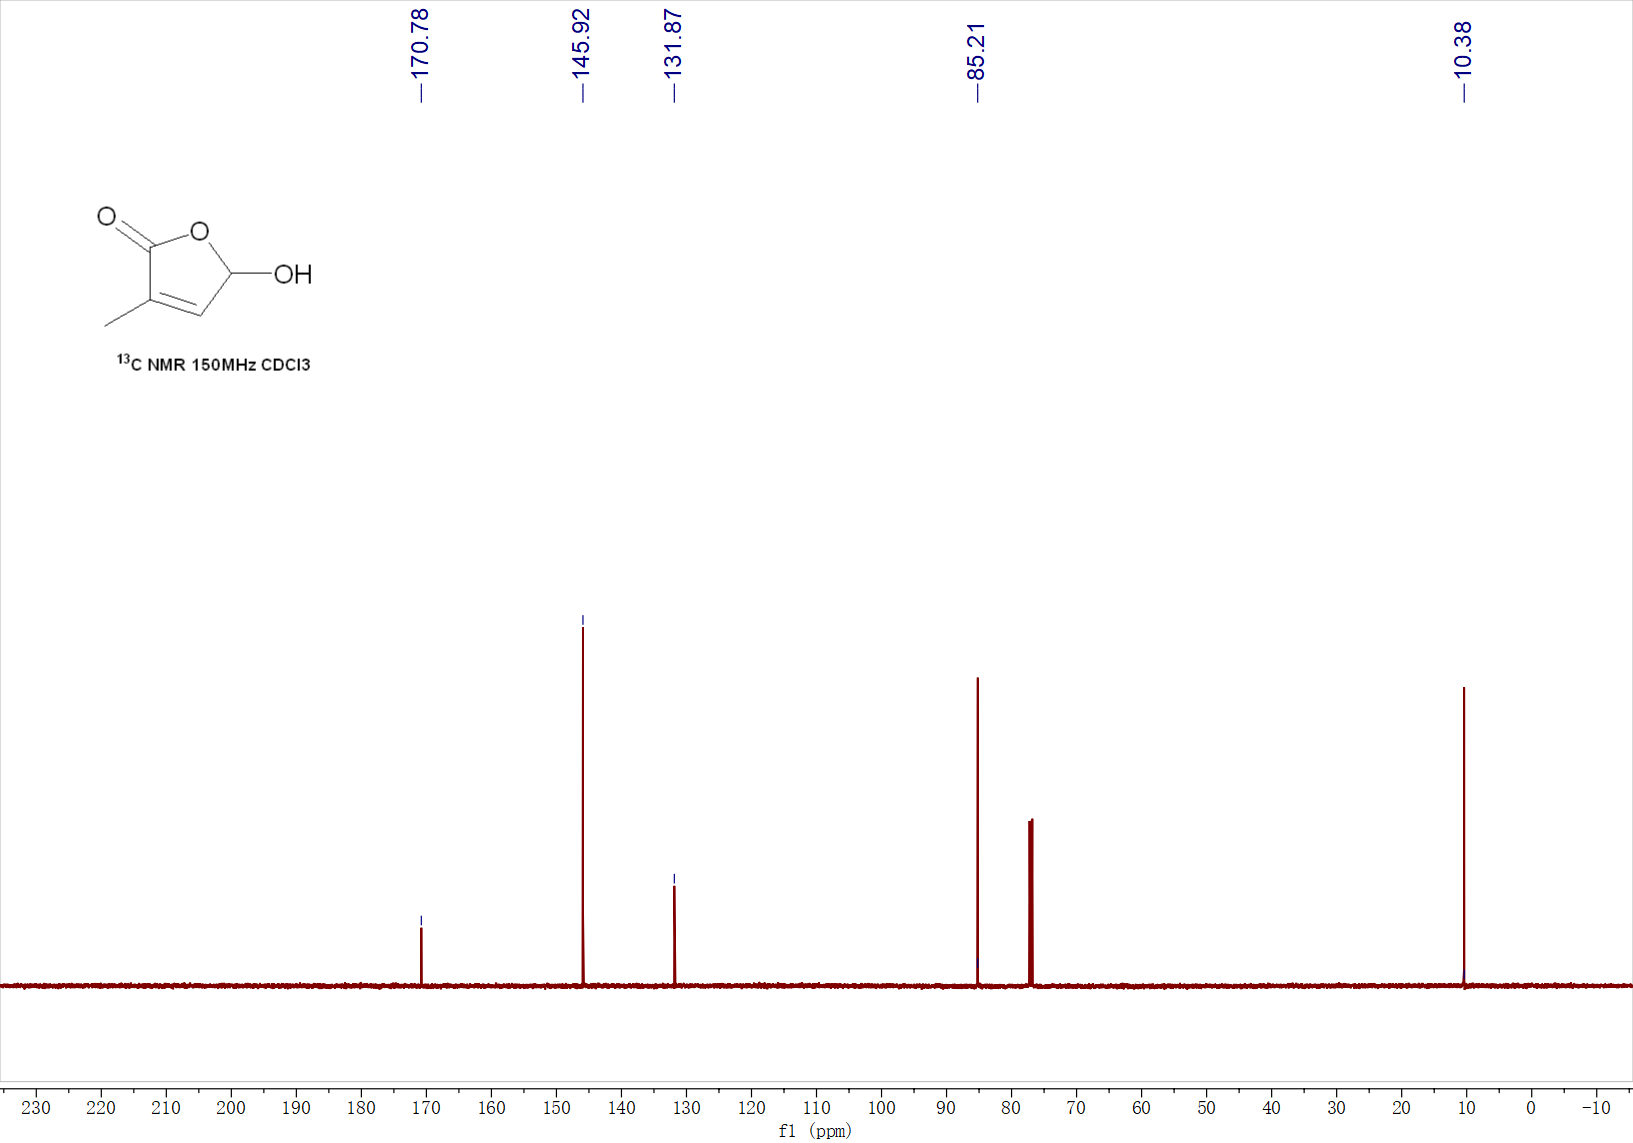


**1H NMR of Intermediate 2**

**
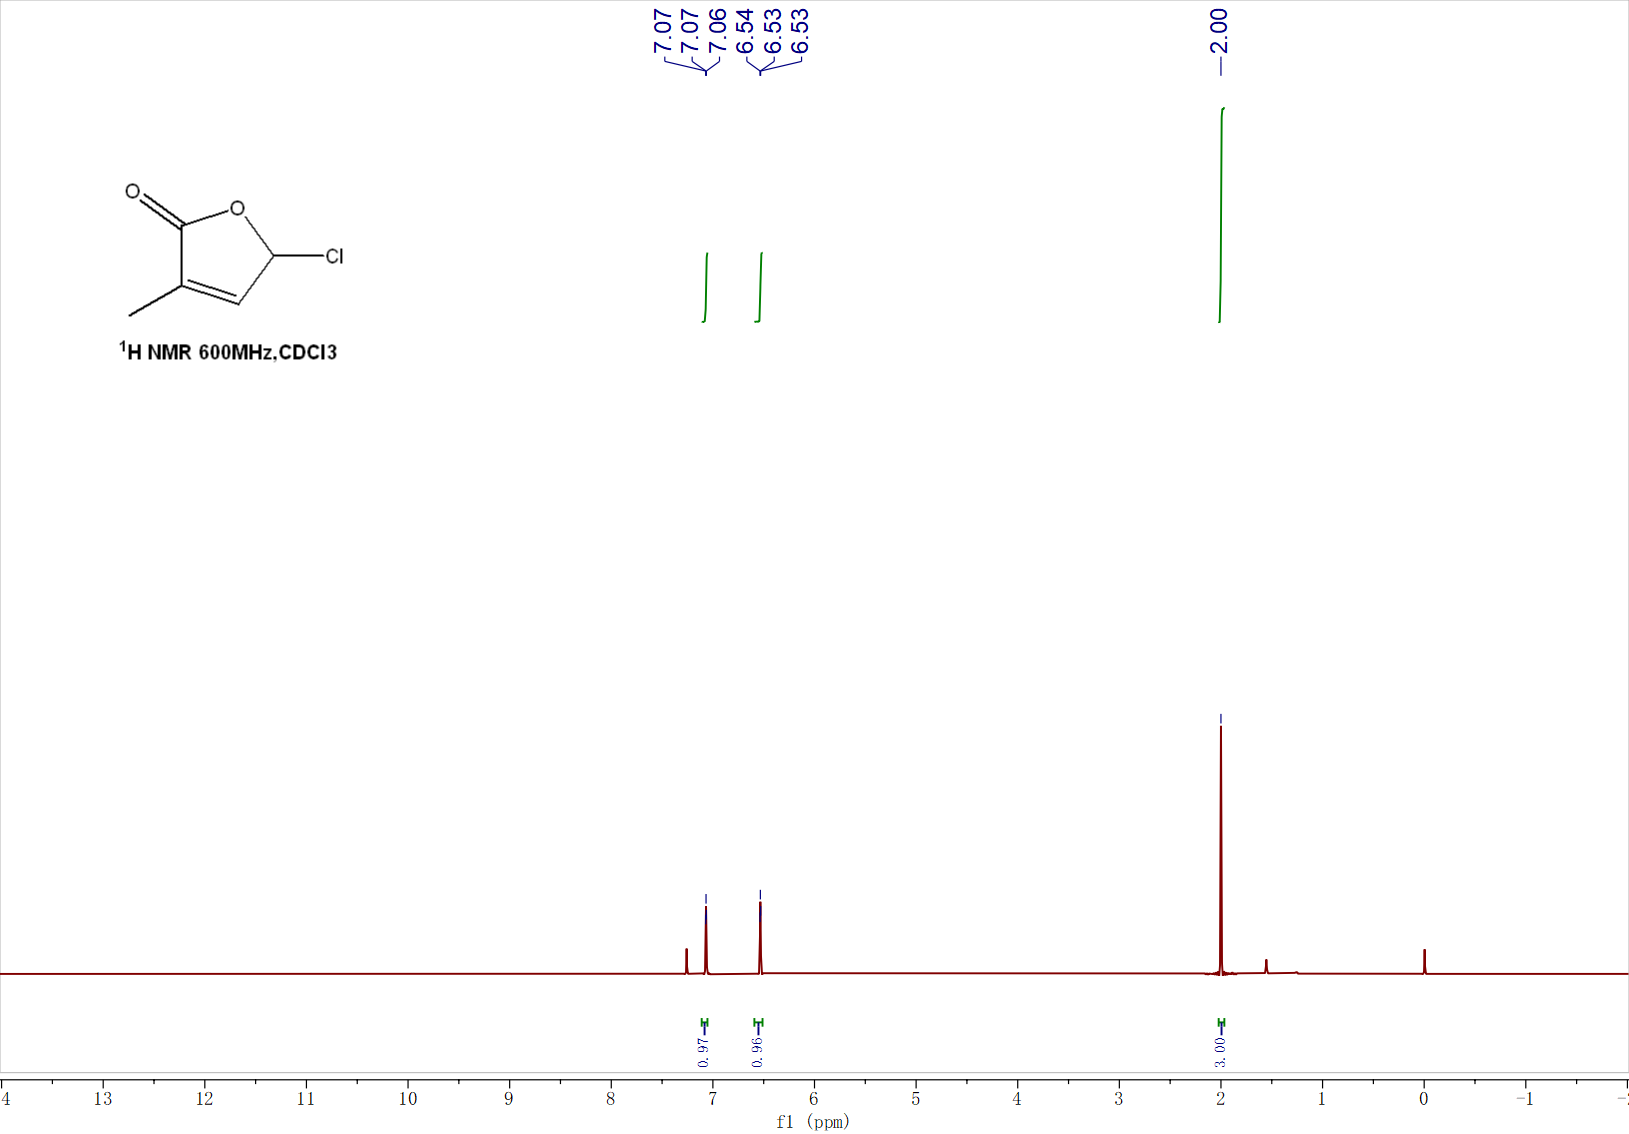
**

**13C NMR of Intermediate 2**

**
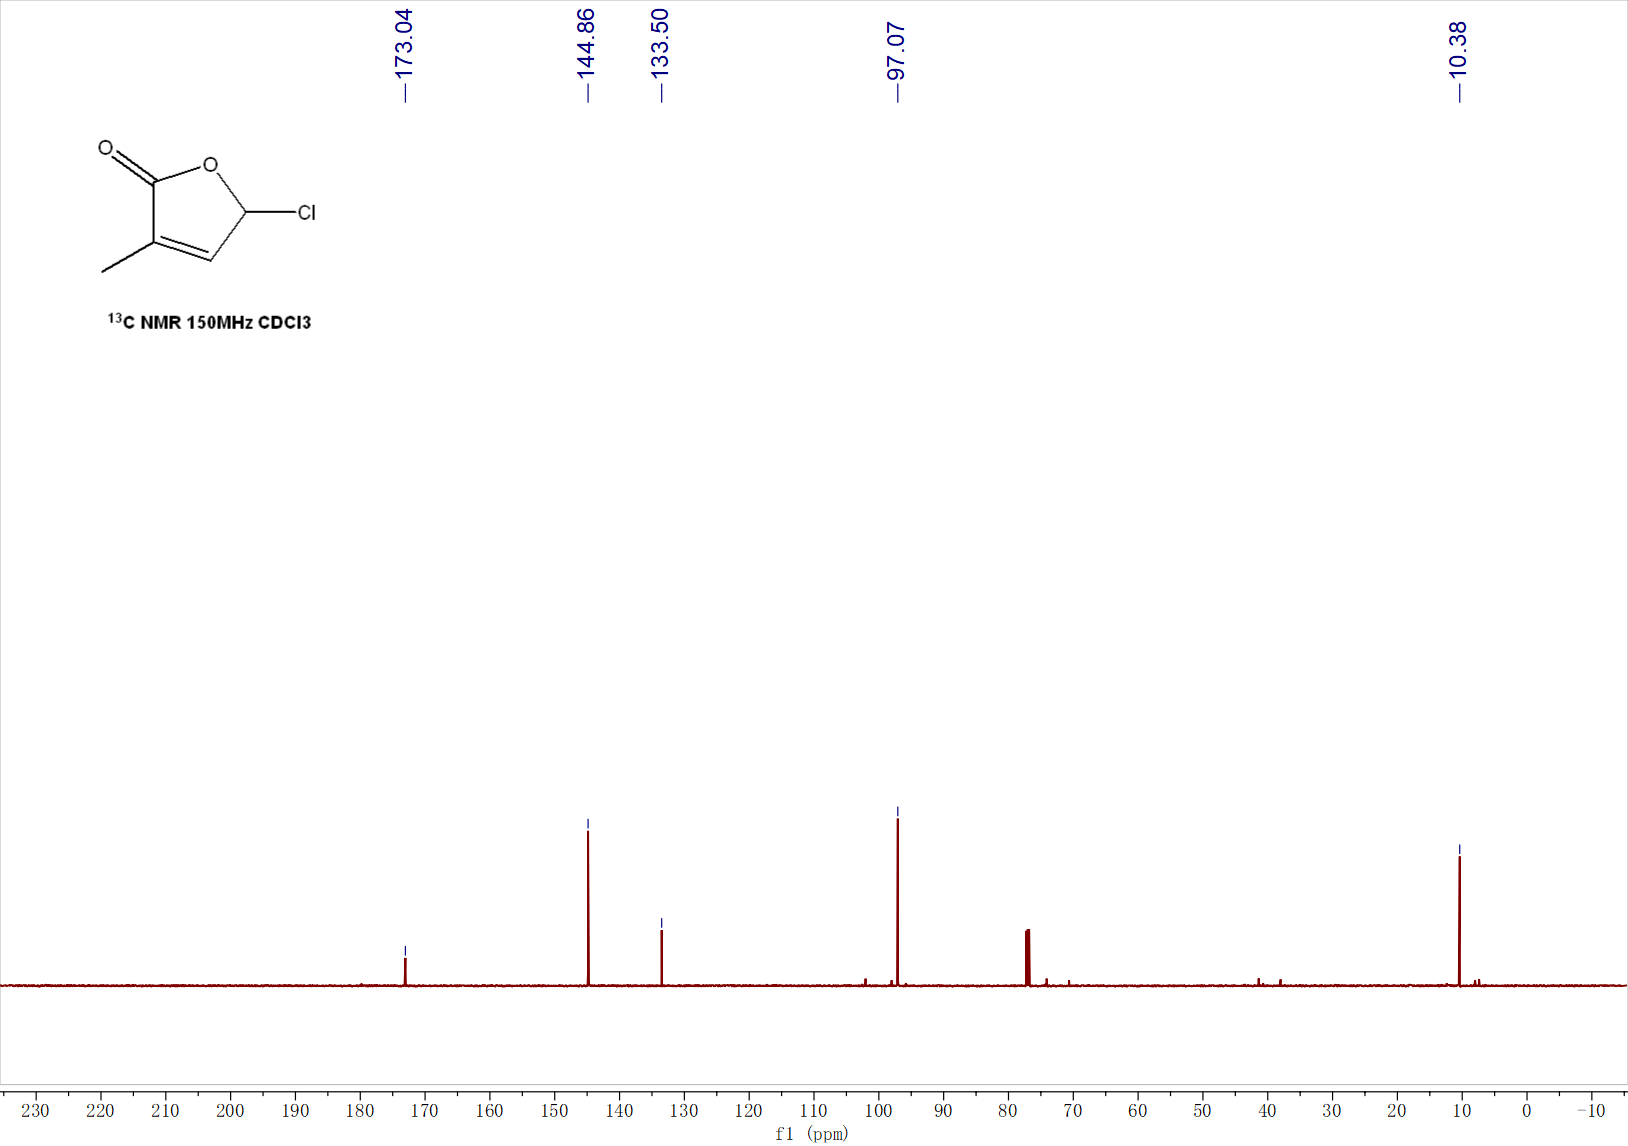
**

**1H NMR of 3a**

**
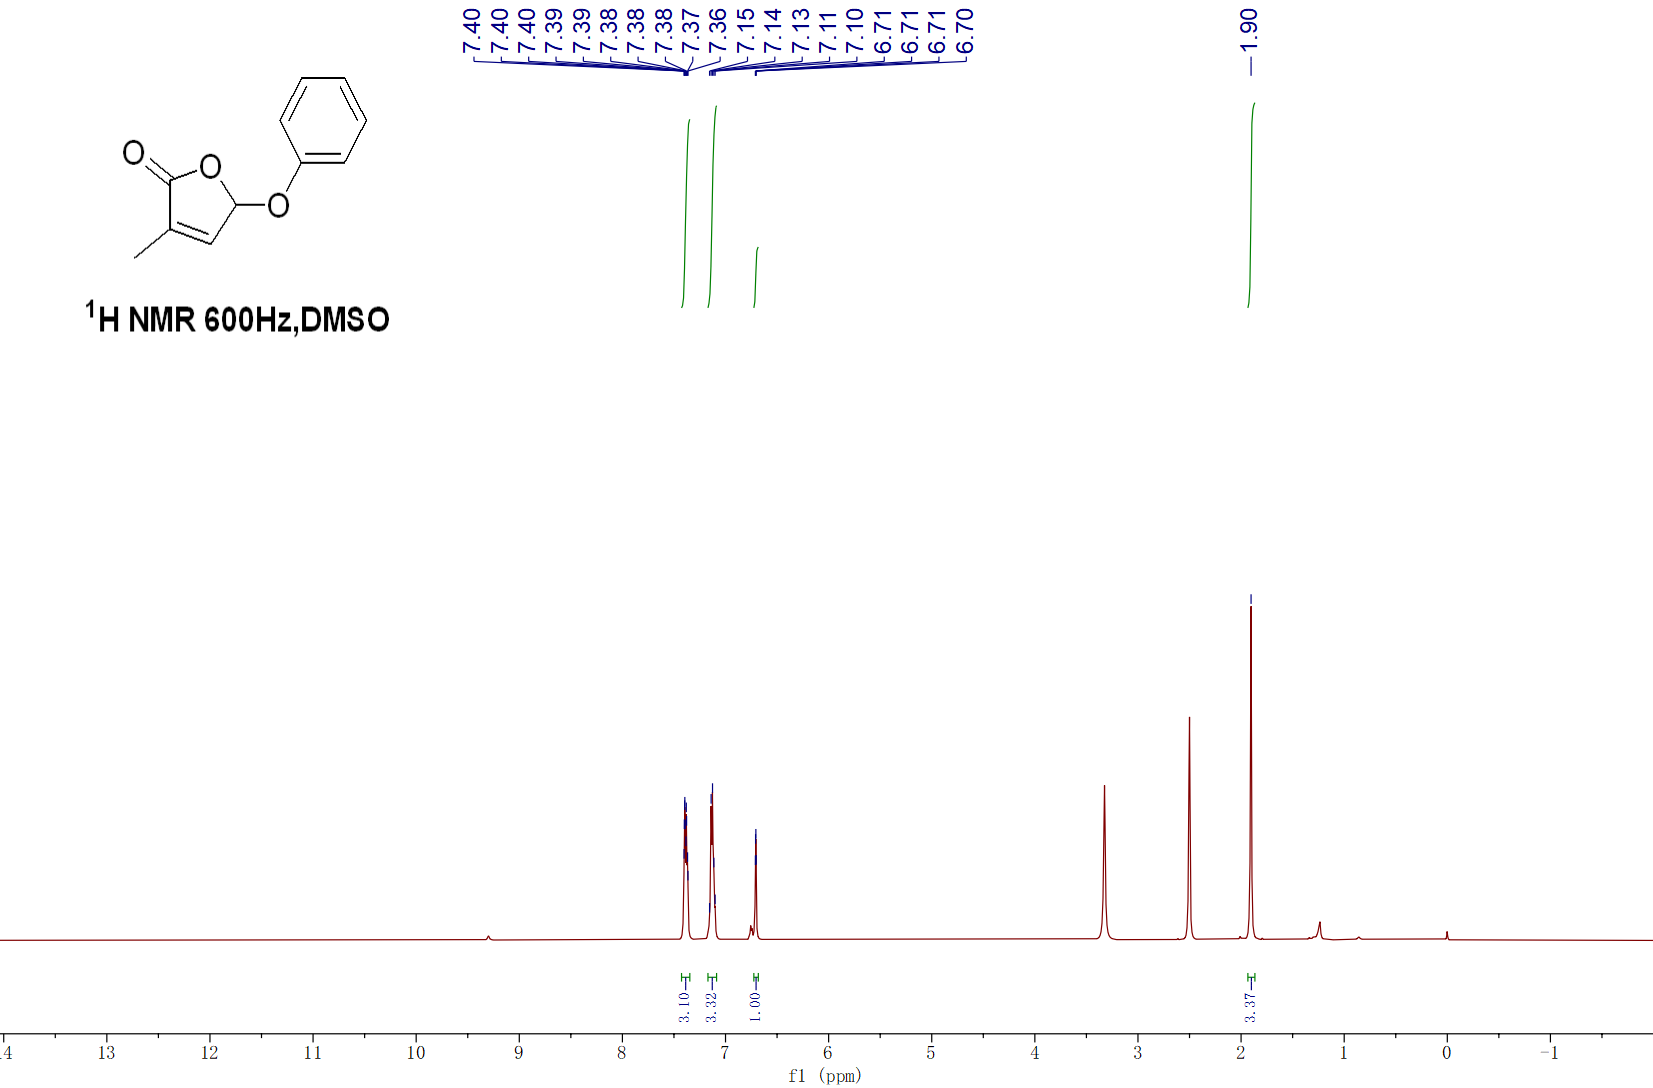
13C NMR of 3a**

**
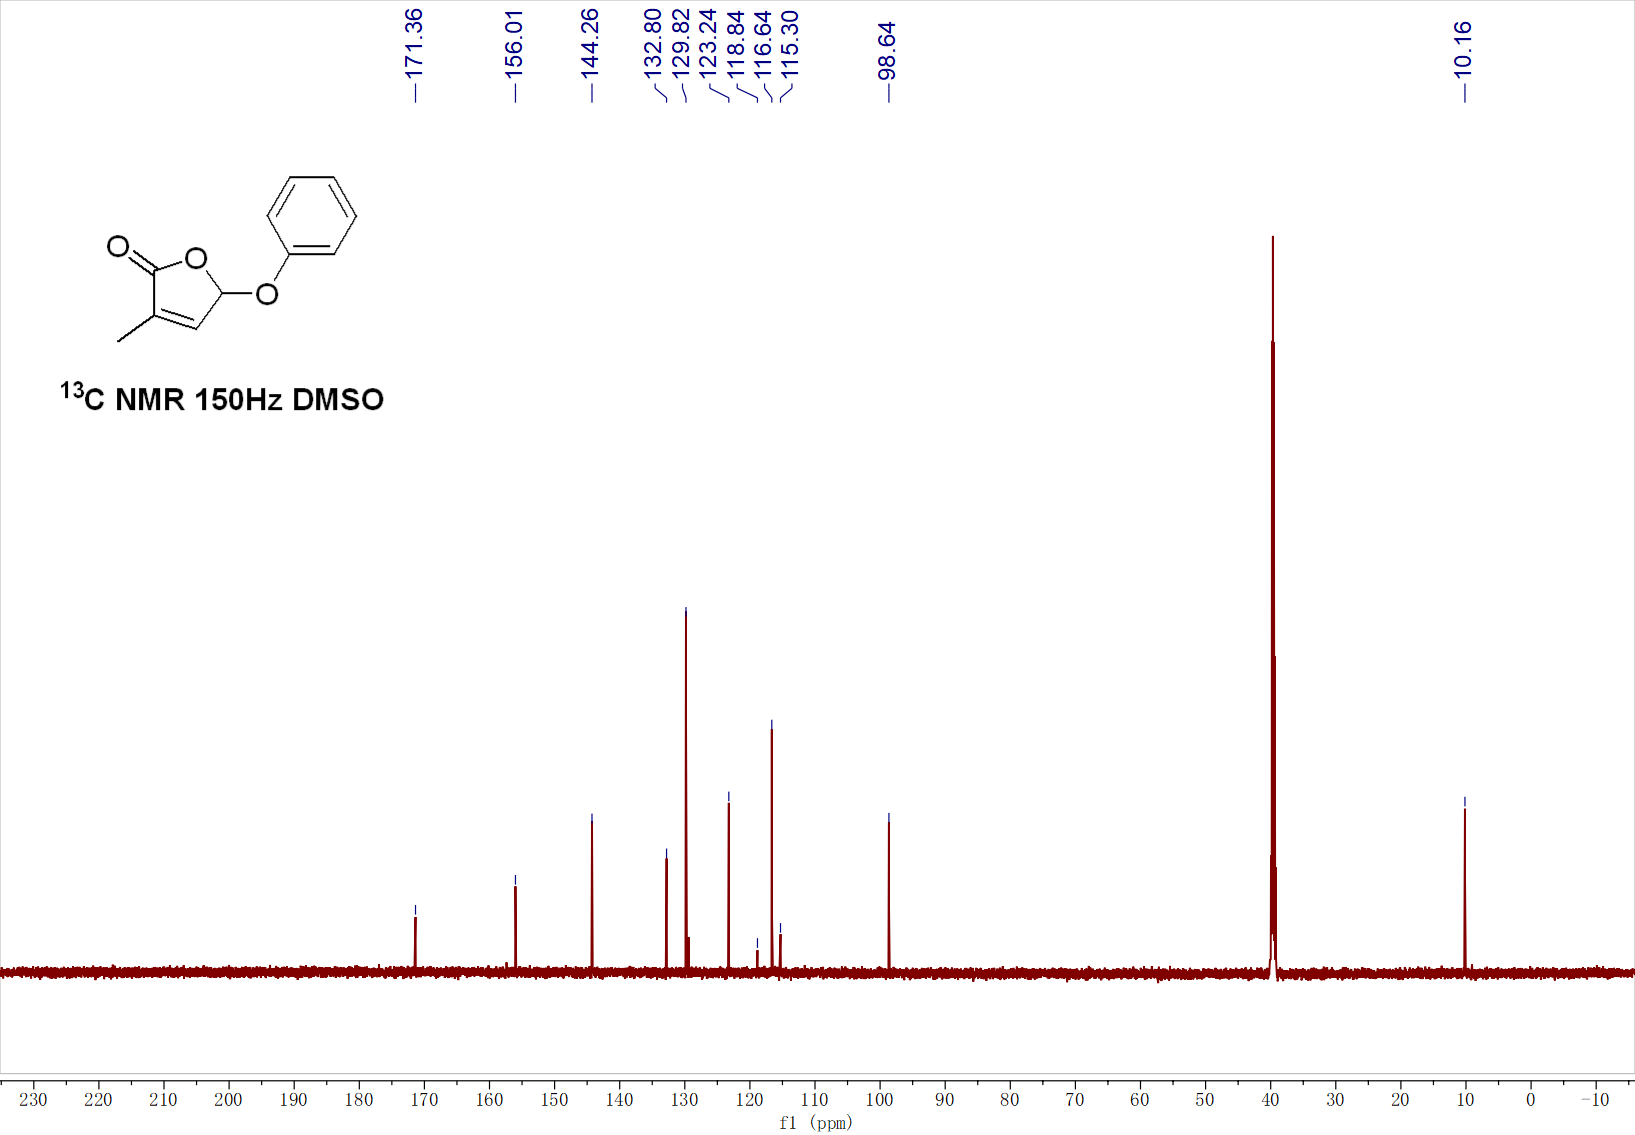
**

**1H NMR of 3b**


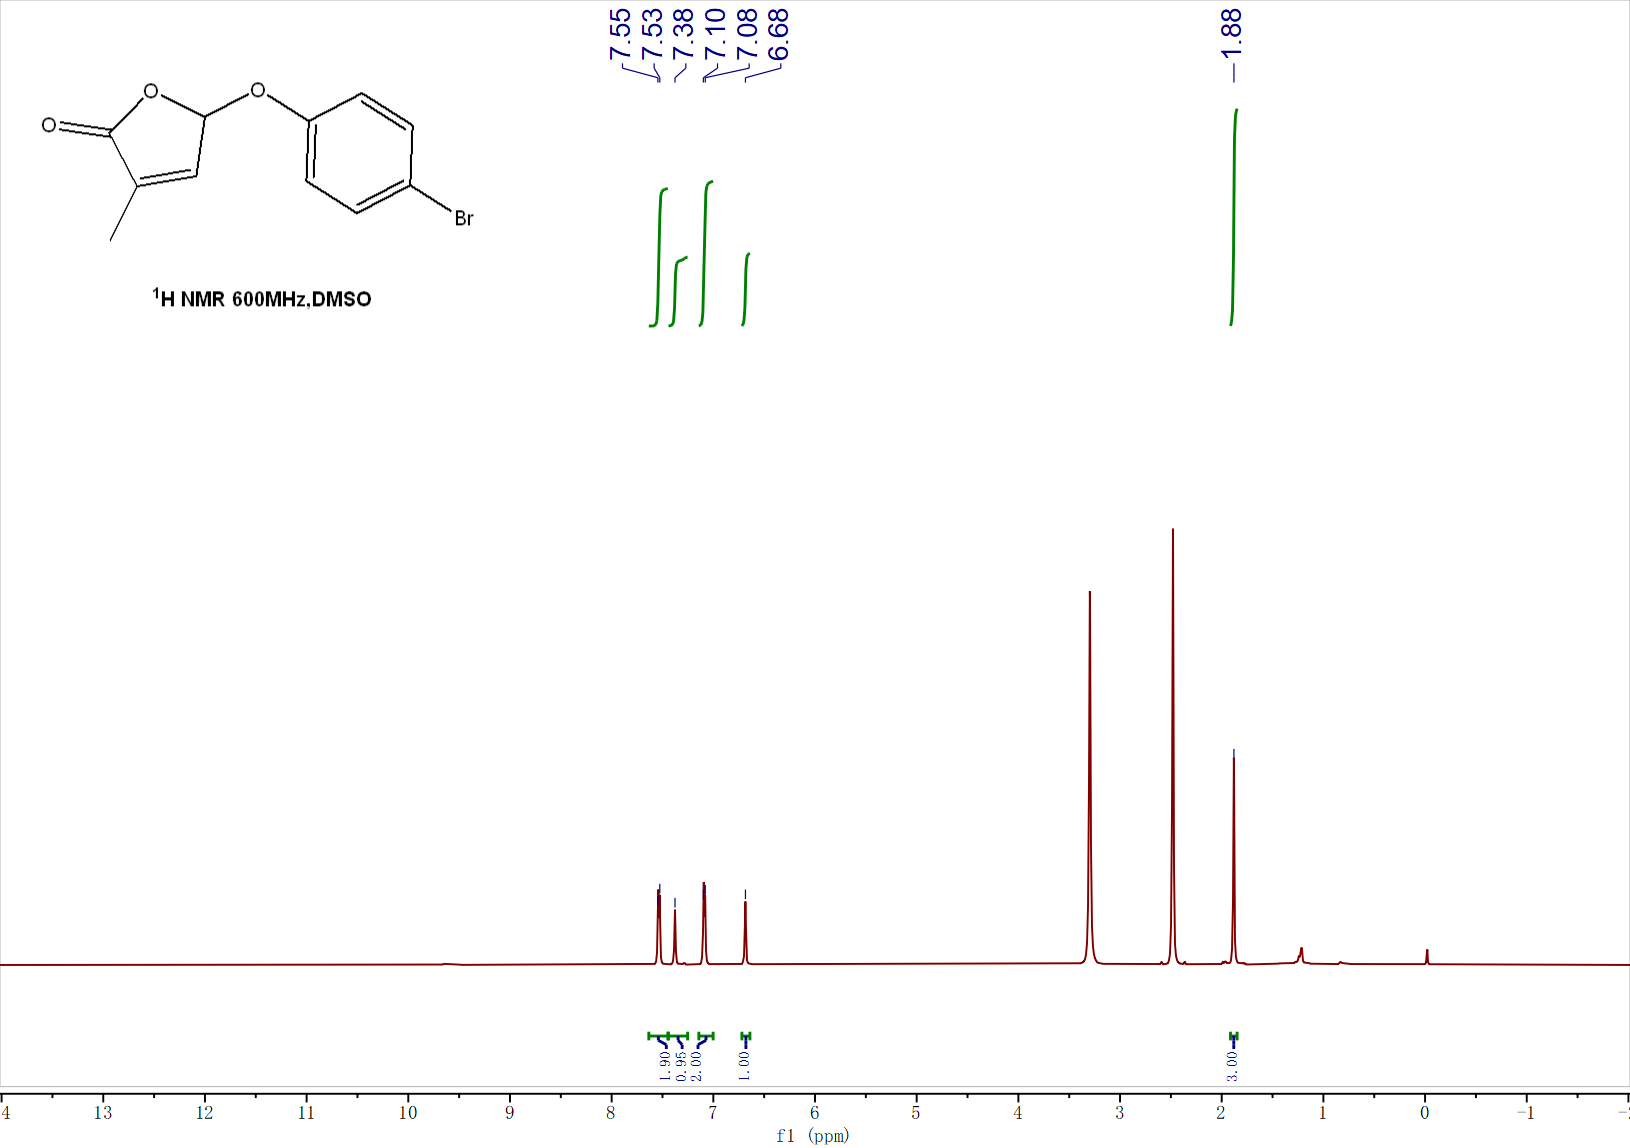


**13C NMR of 3b**

**
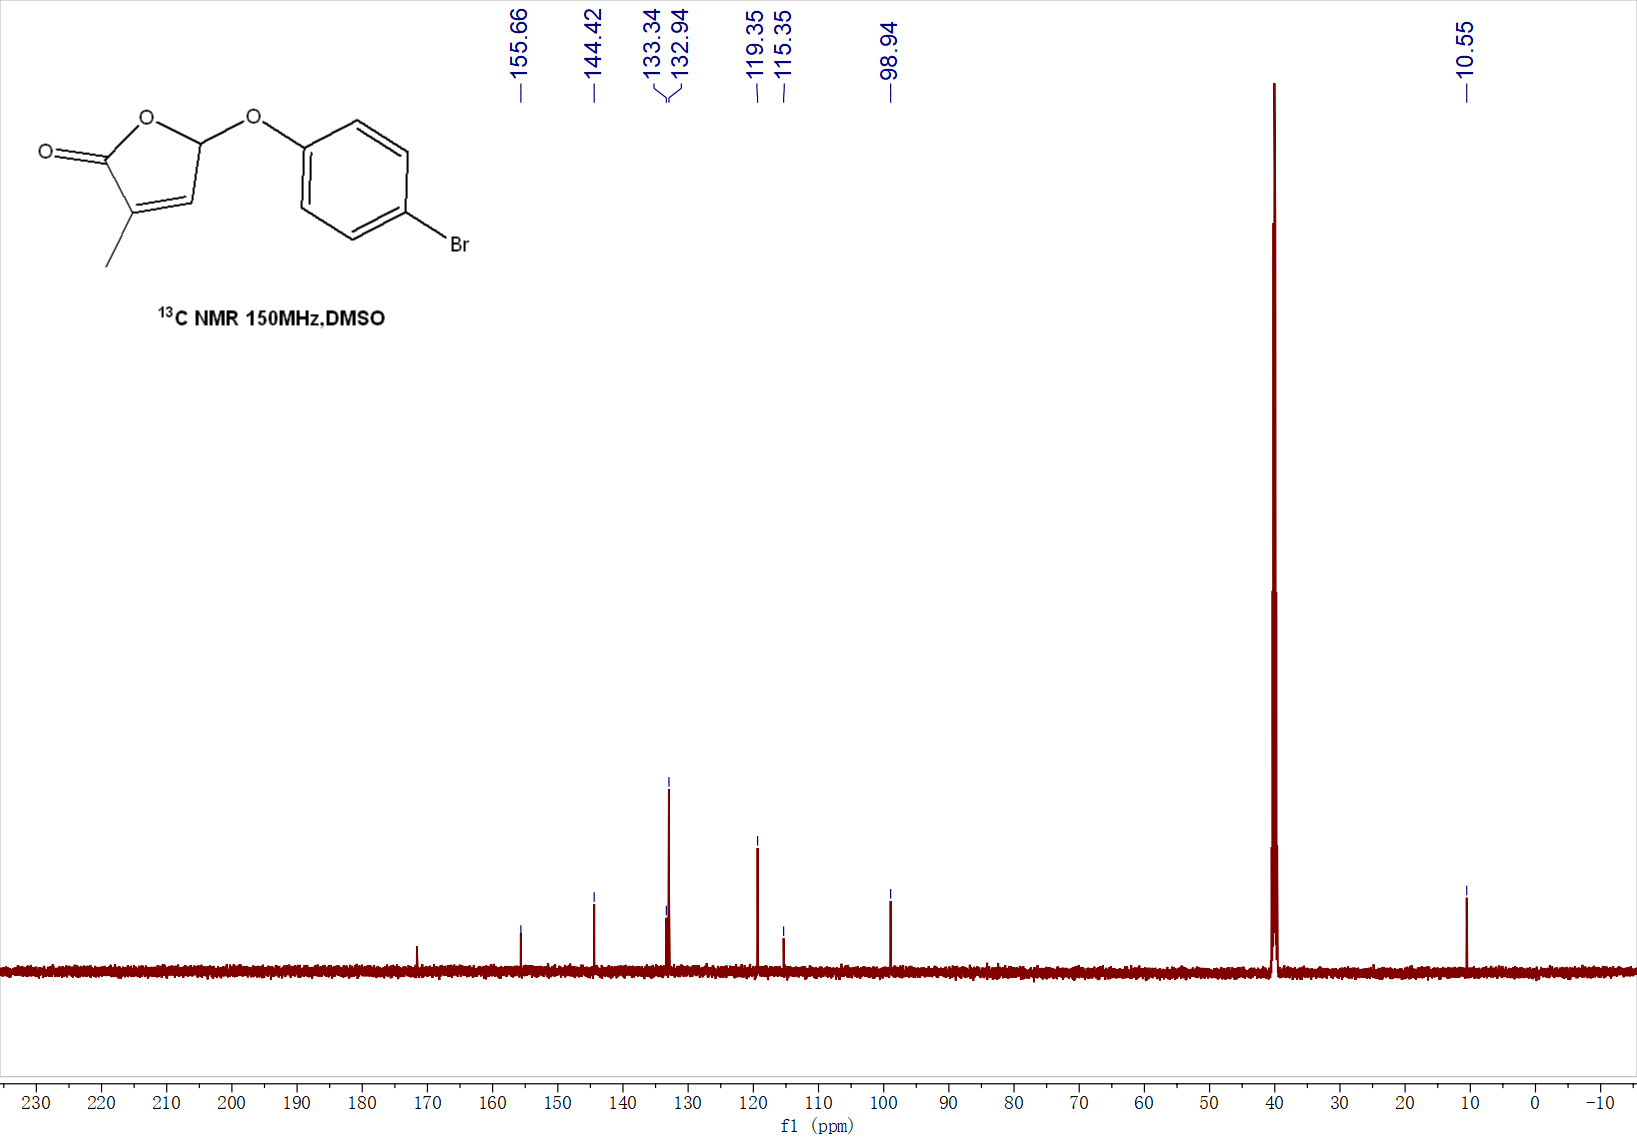
**

**1H NMR of 3c**


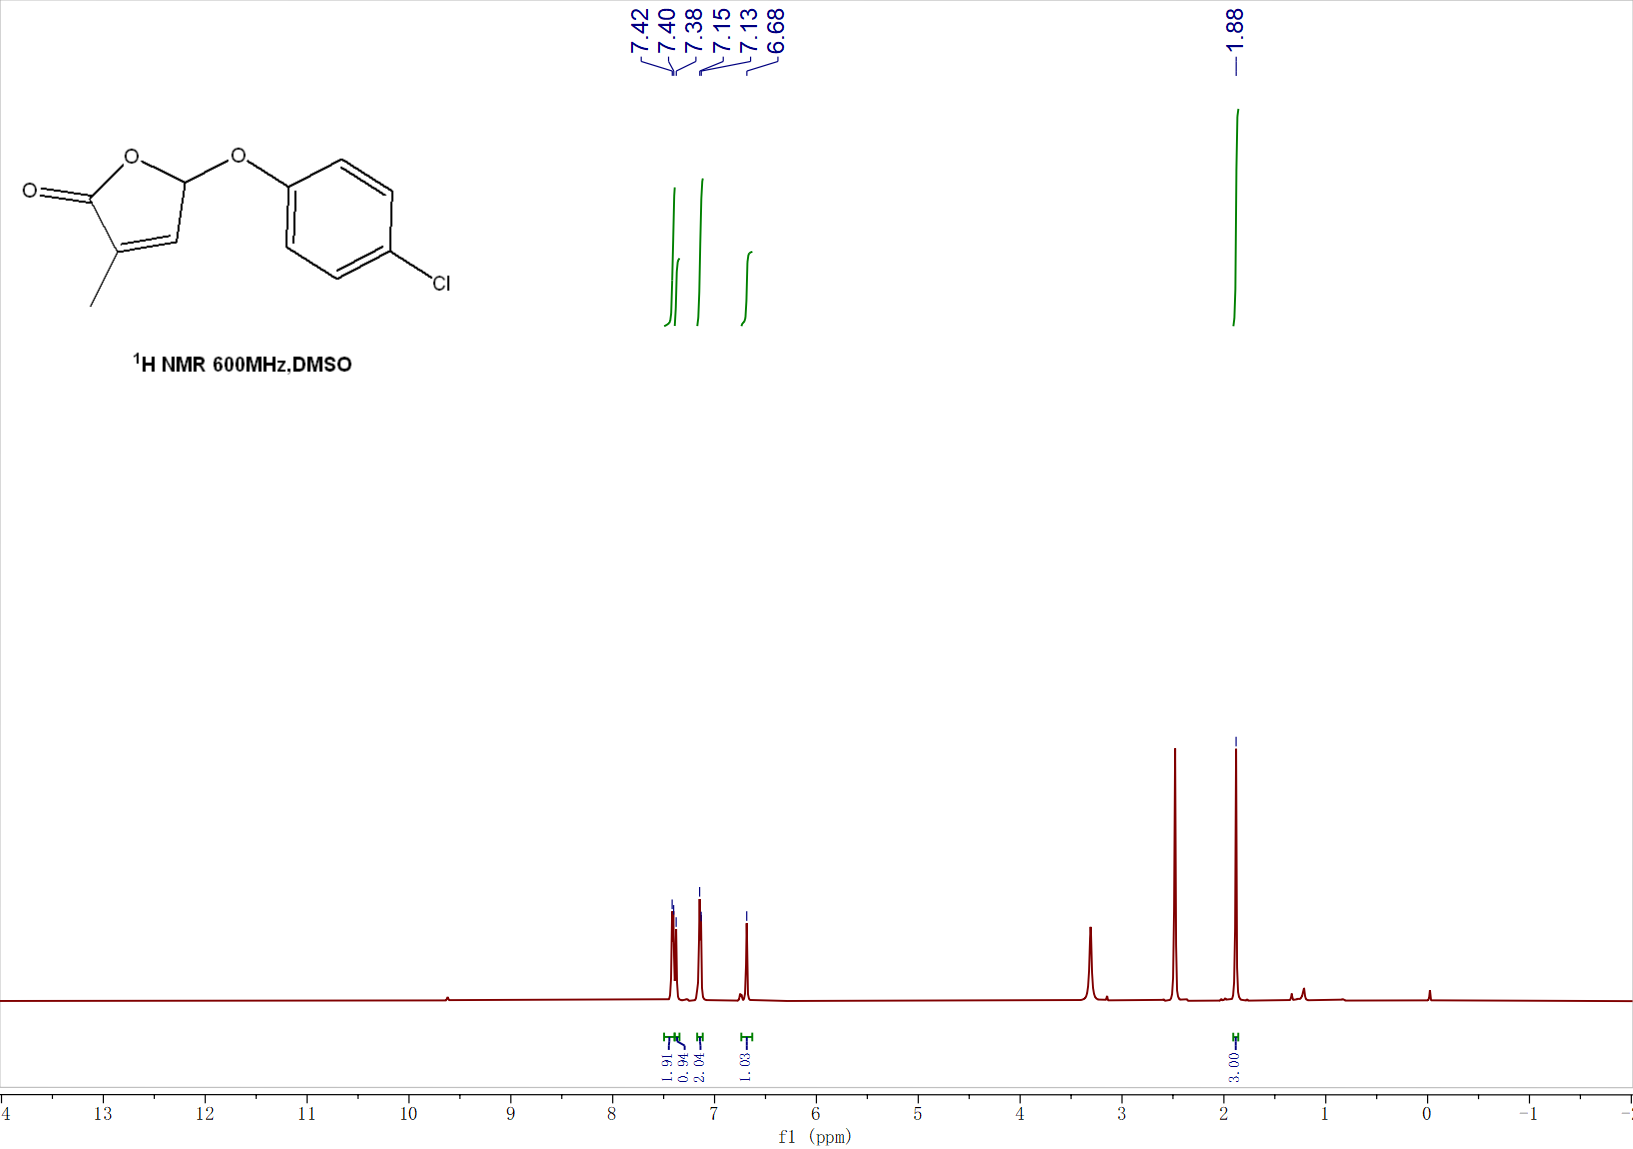


**13C NMR of 3c**


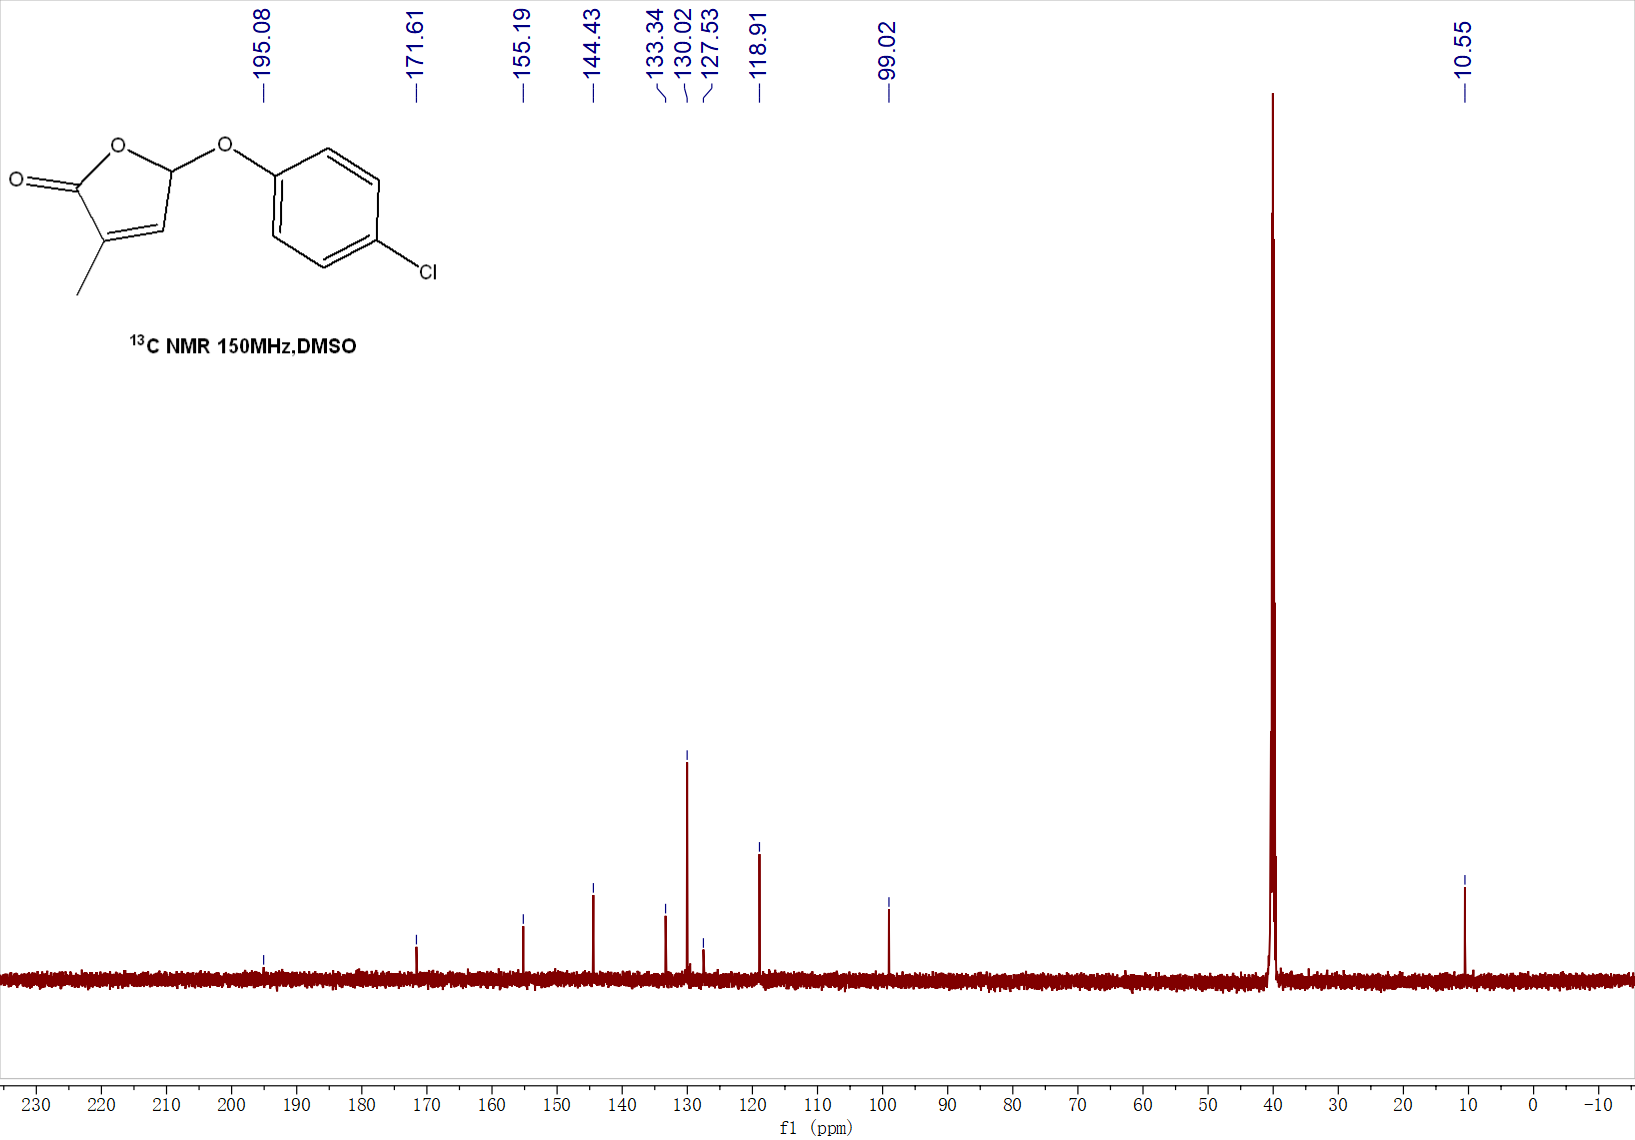


**1H NMR of 3d**


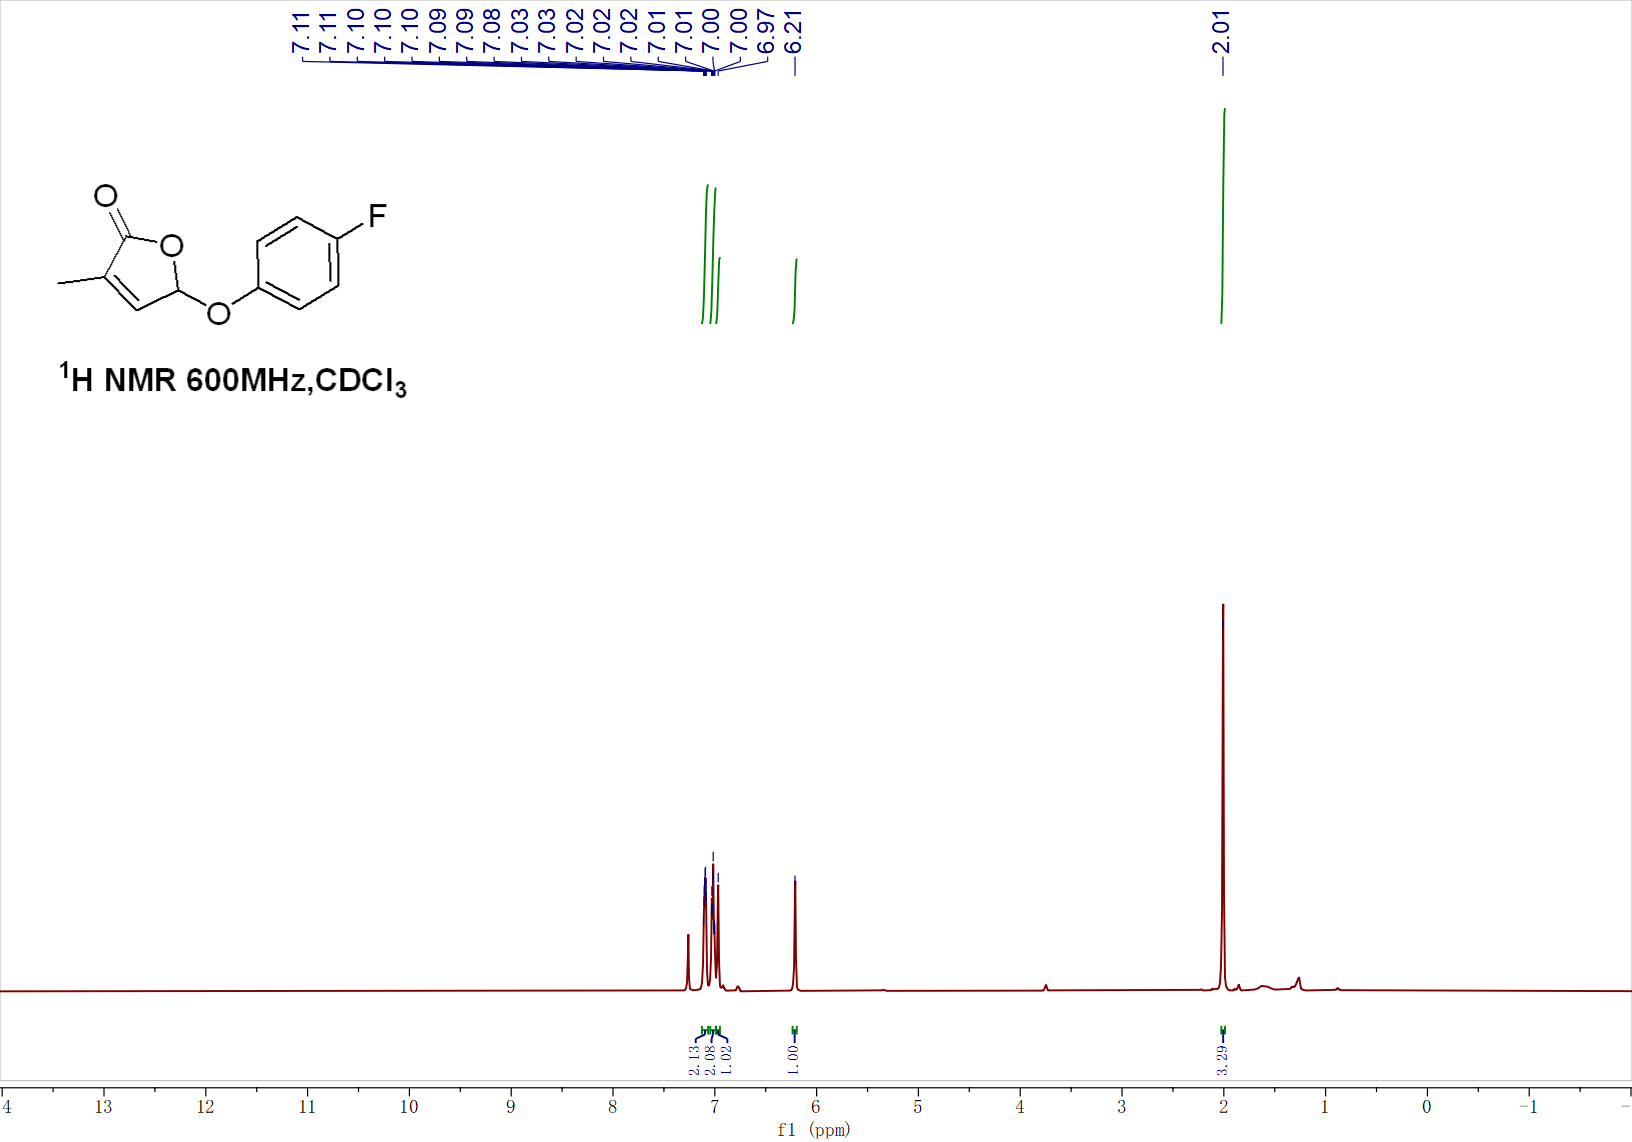


**13C NMR of 3d**


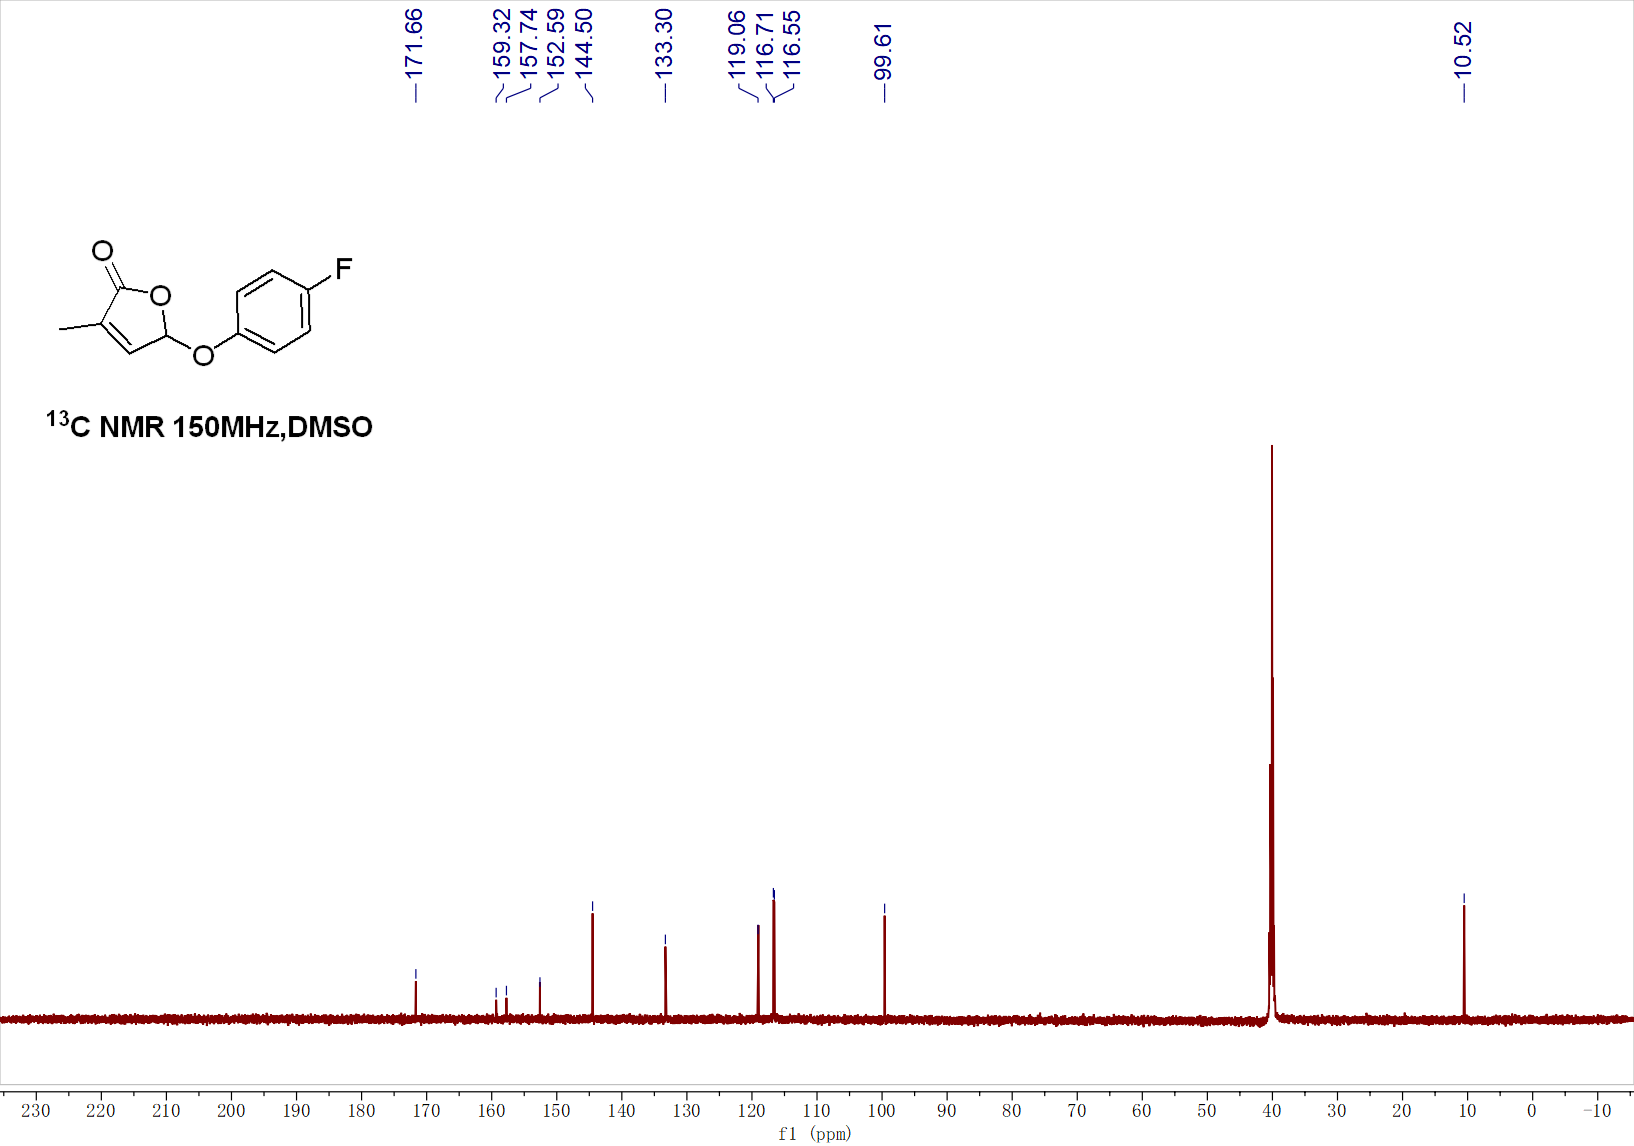


**1H NMR of 3e**


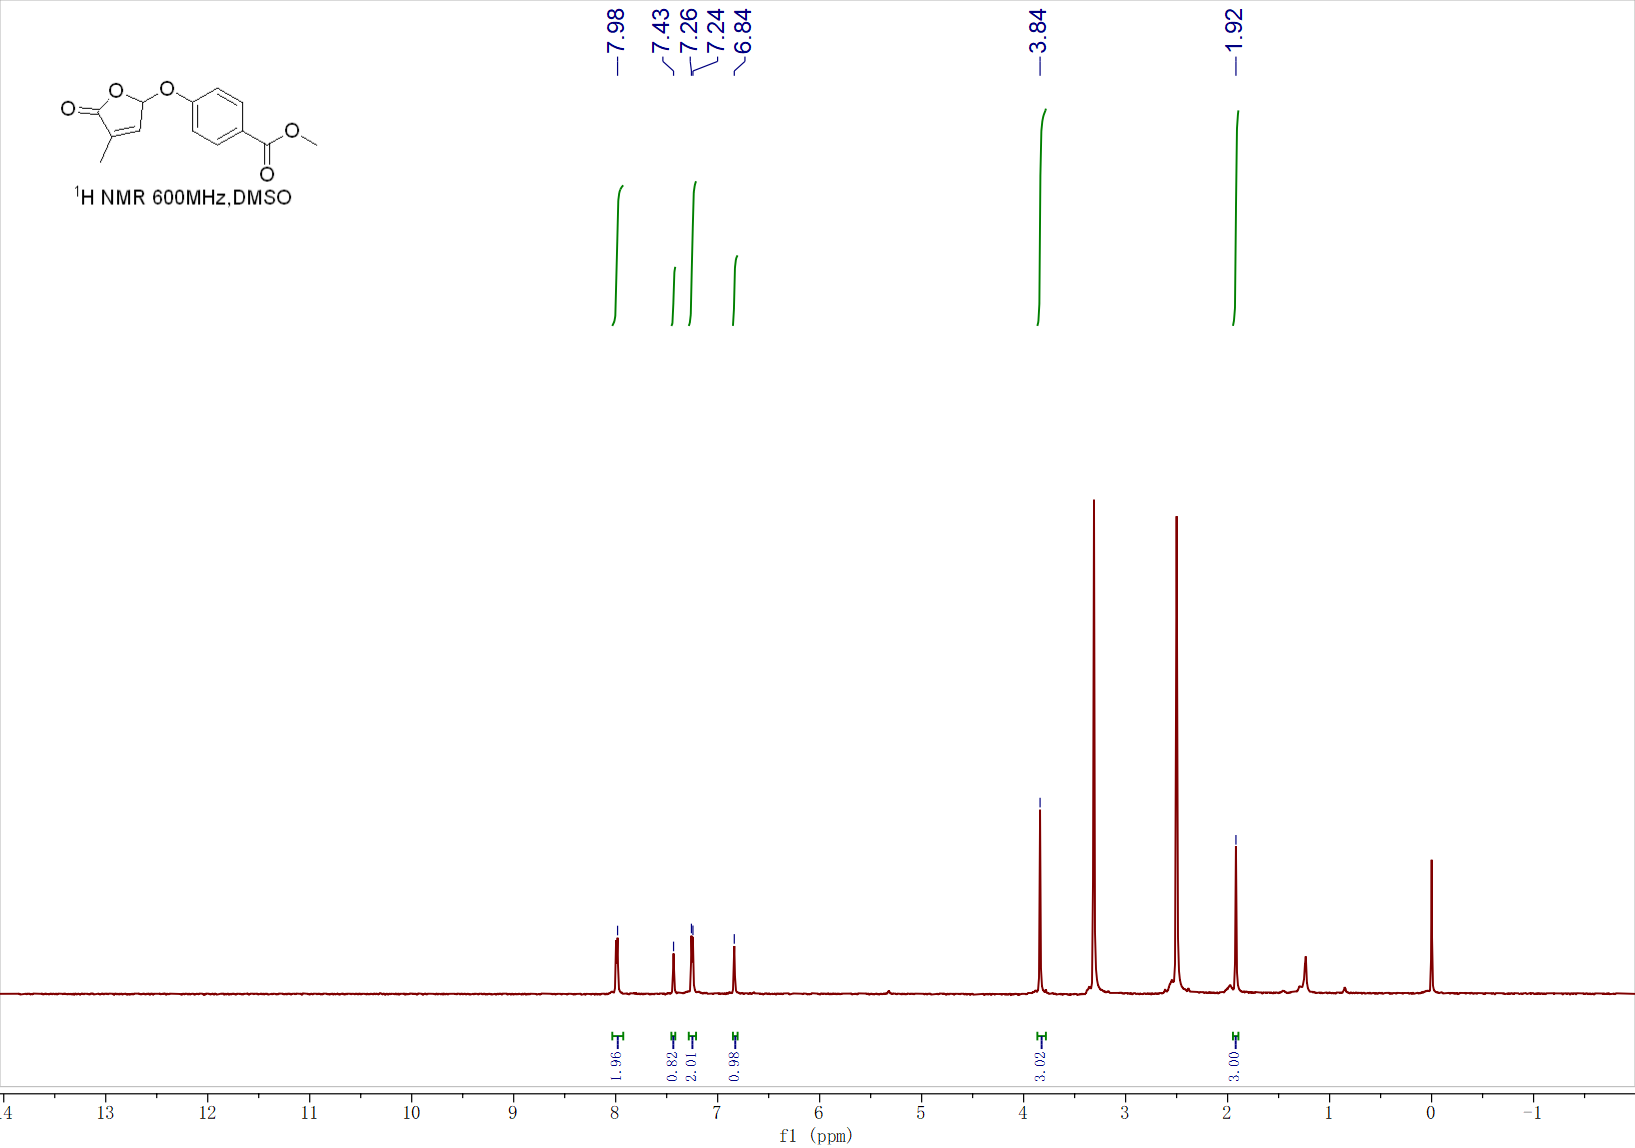


**13C NMR of 3e**


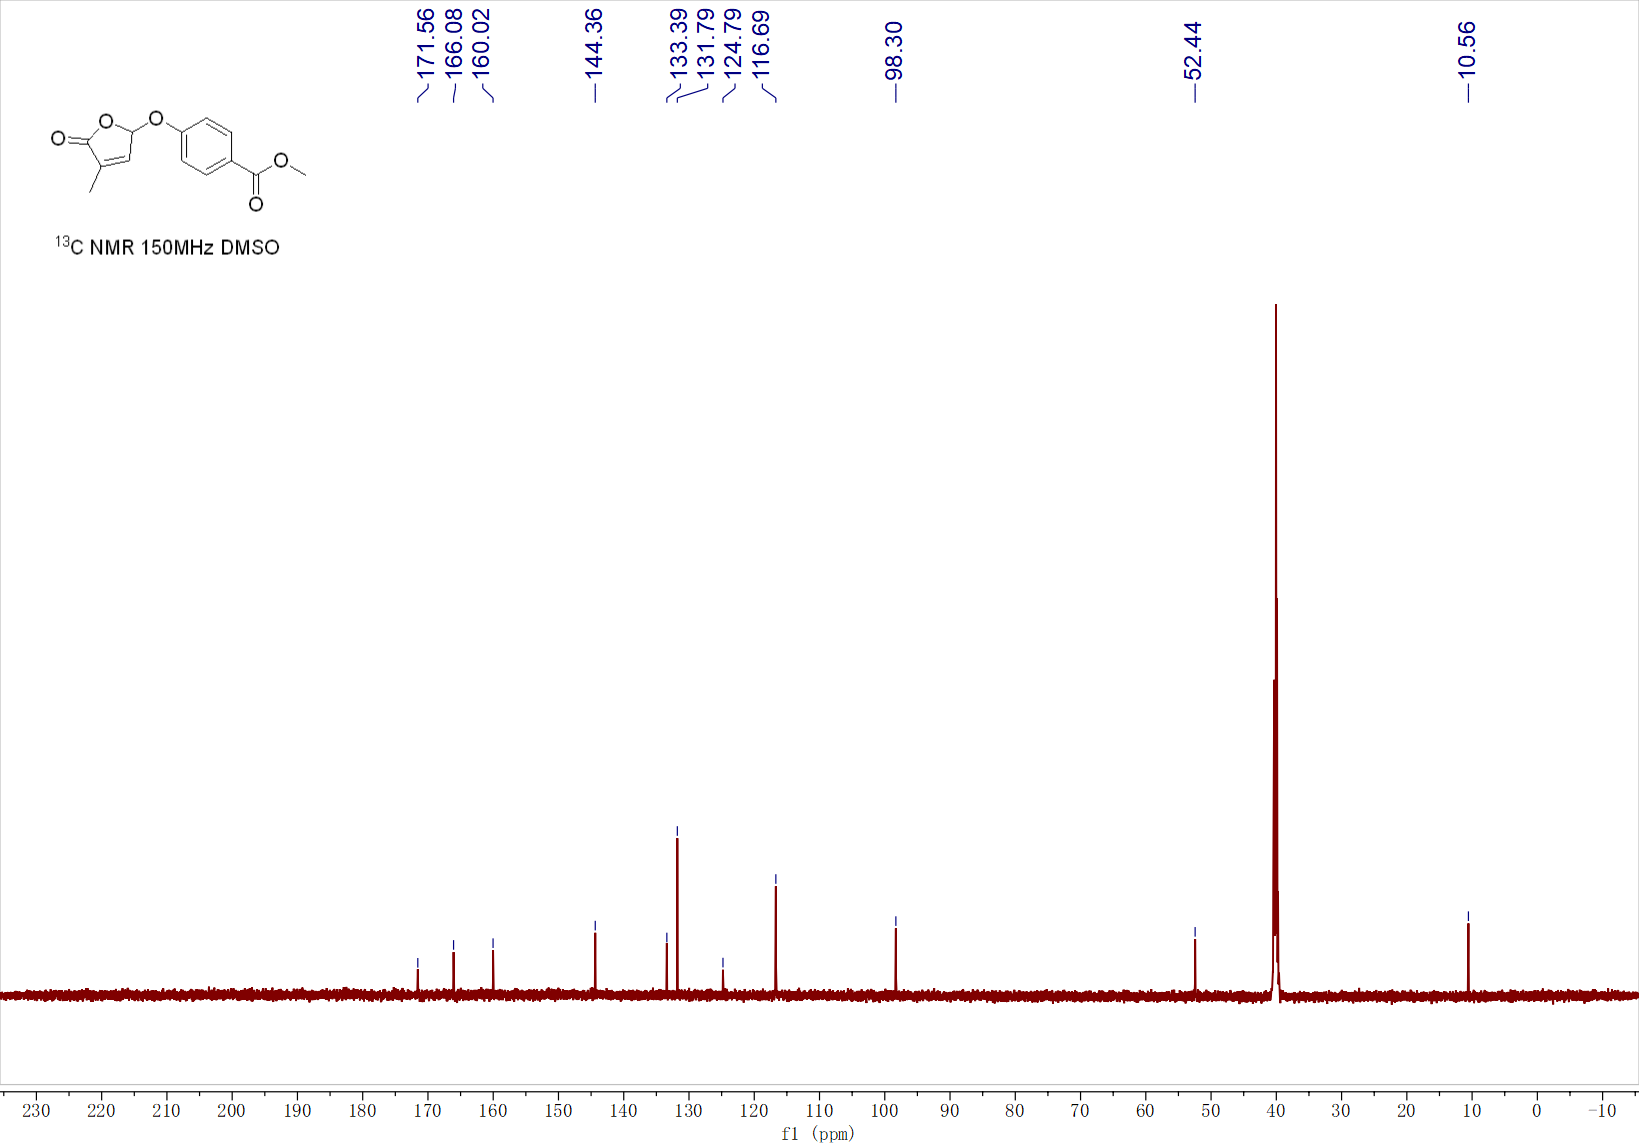


**1H NMR of 3f**


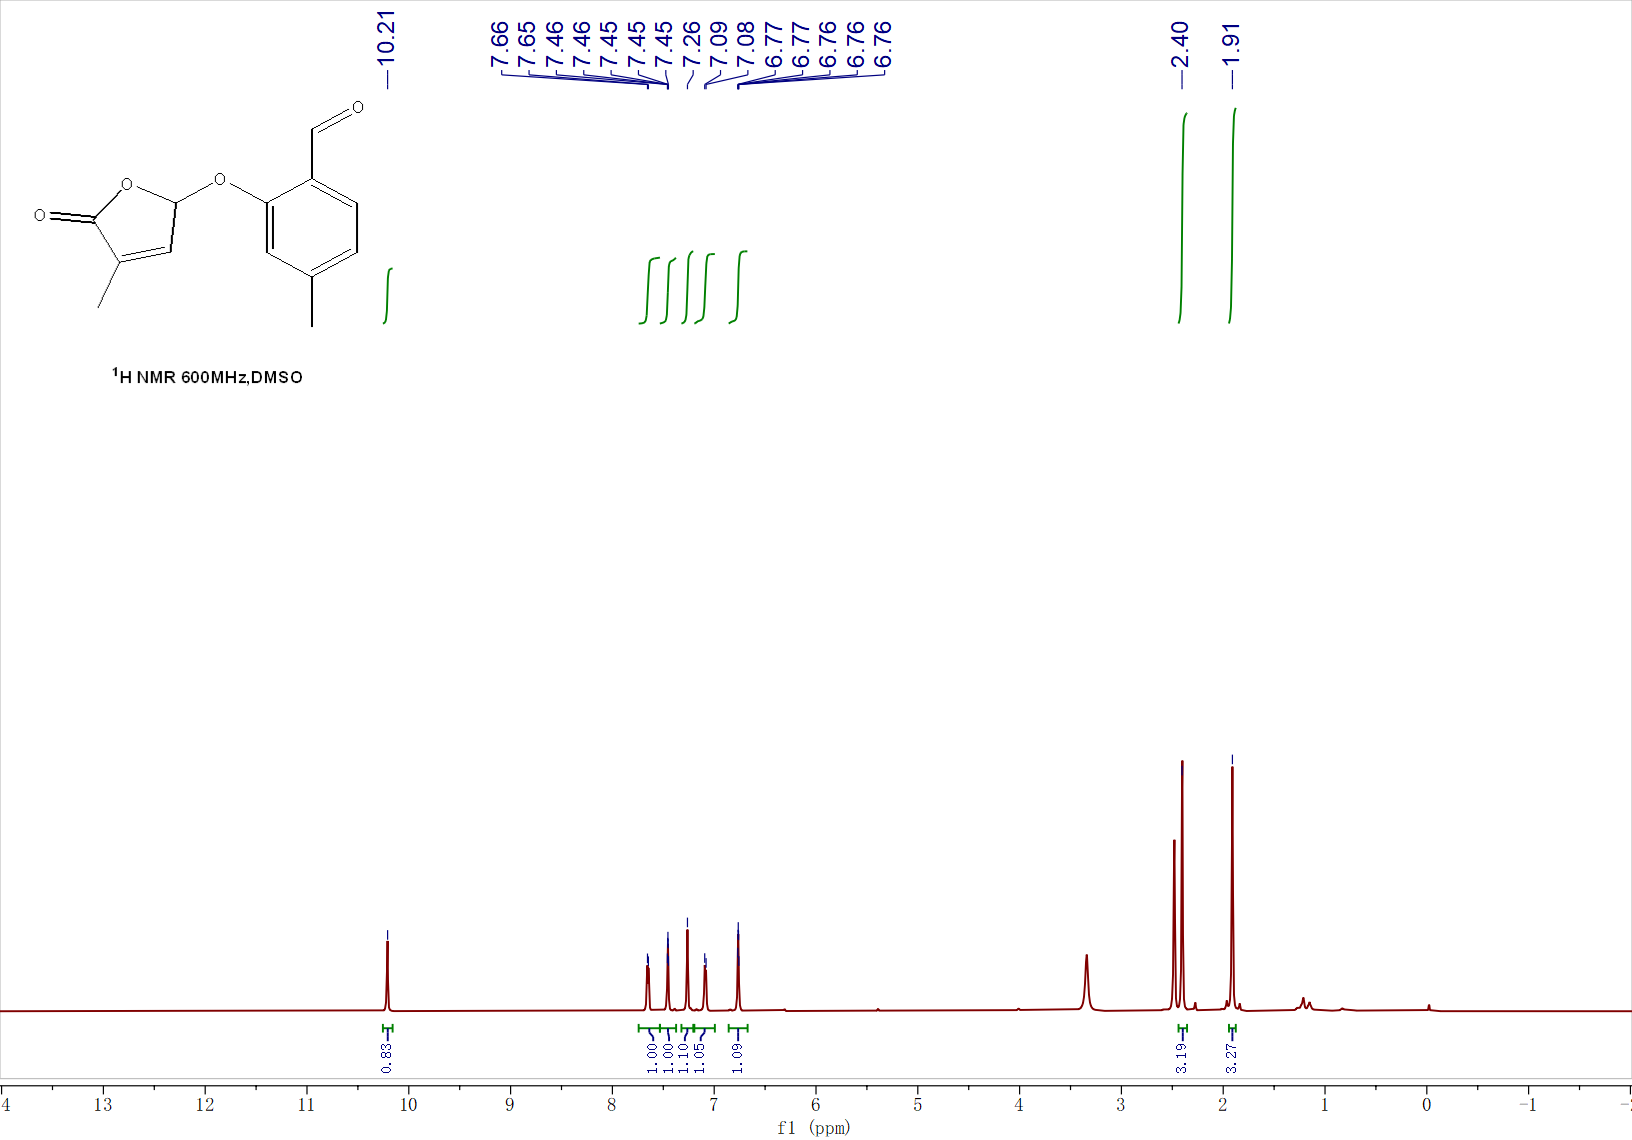


**13C NMR of 3f**


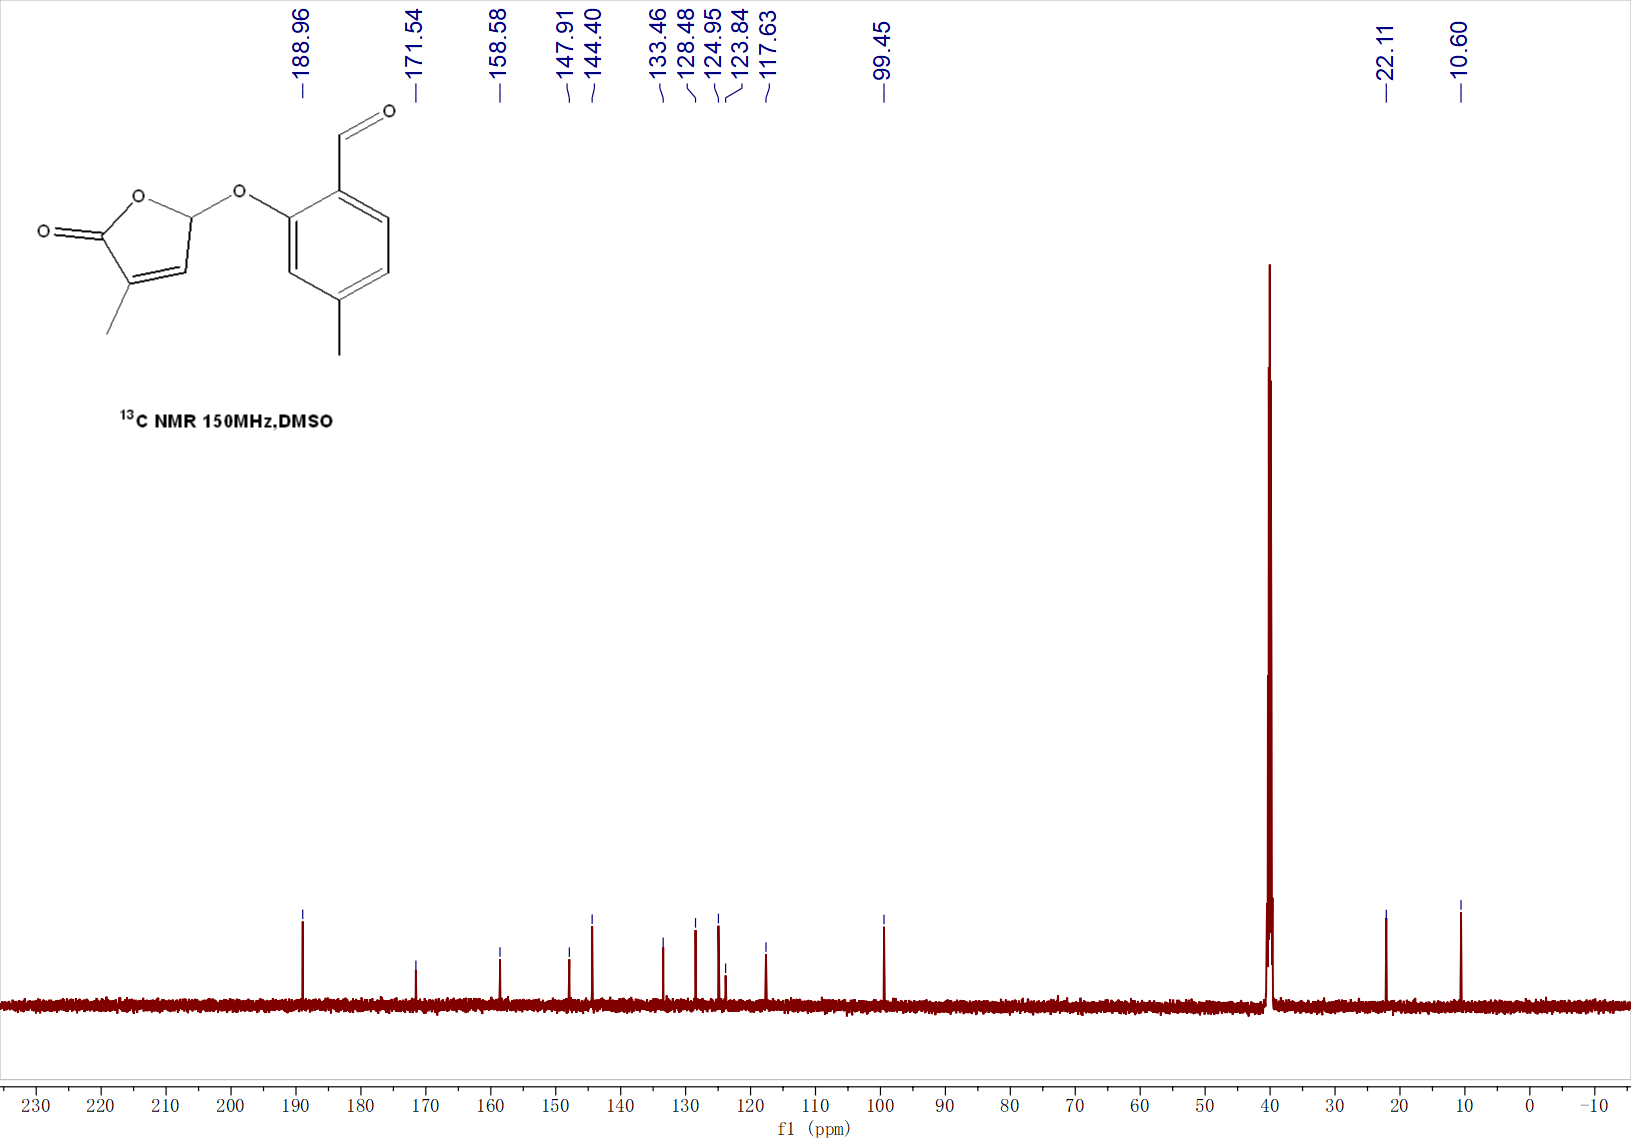


**1H NMR of 3g**


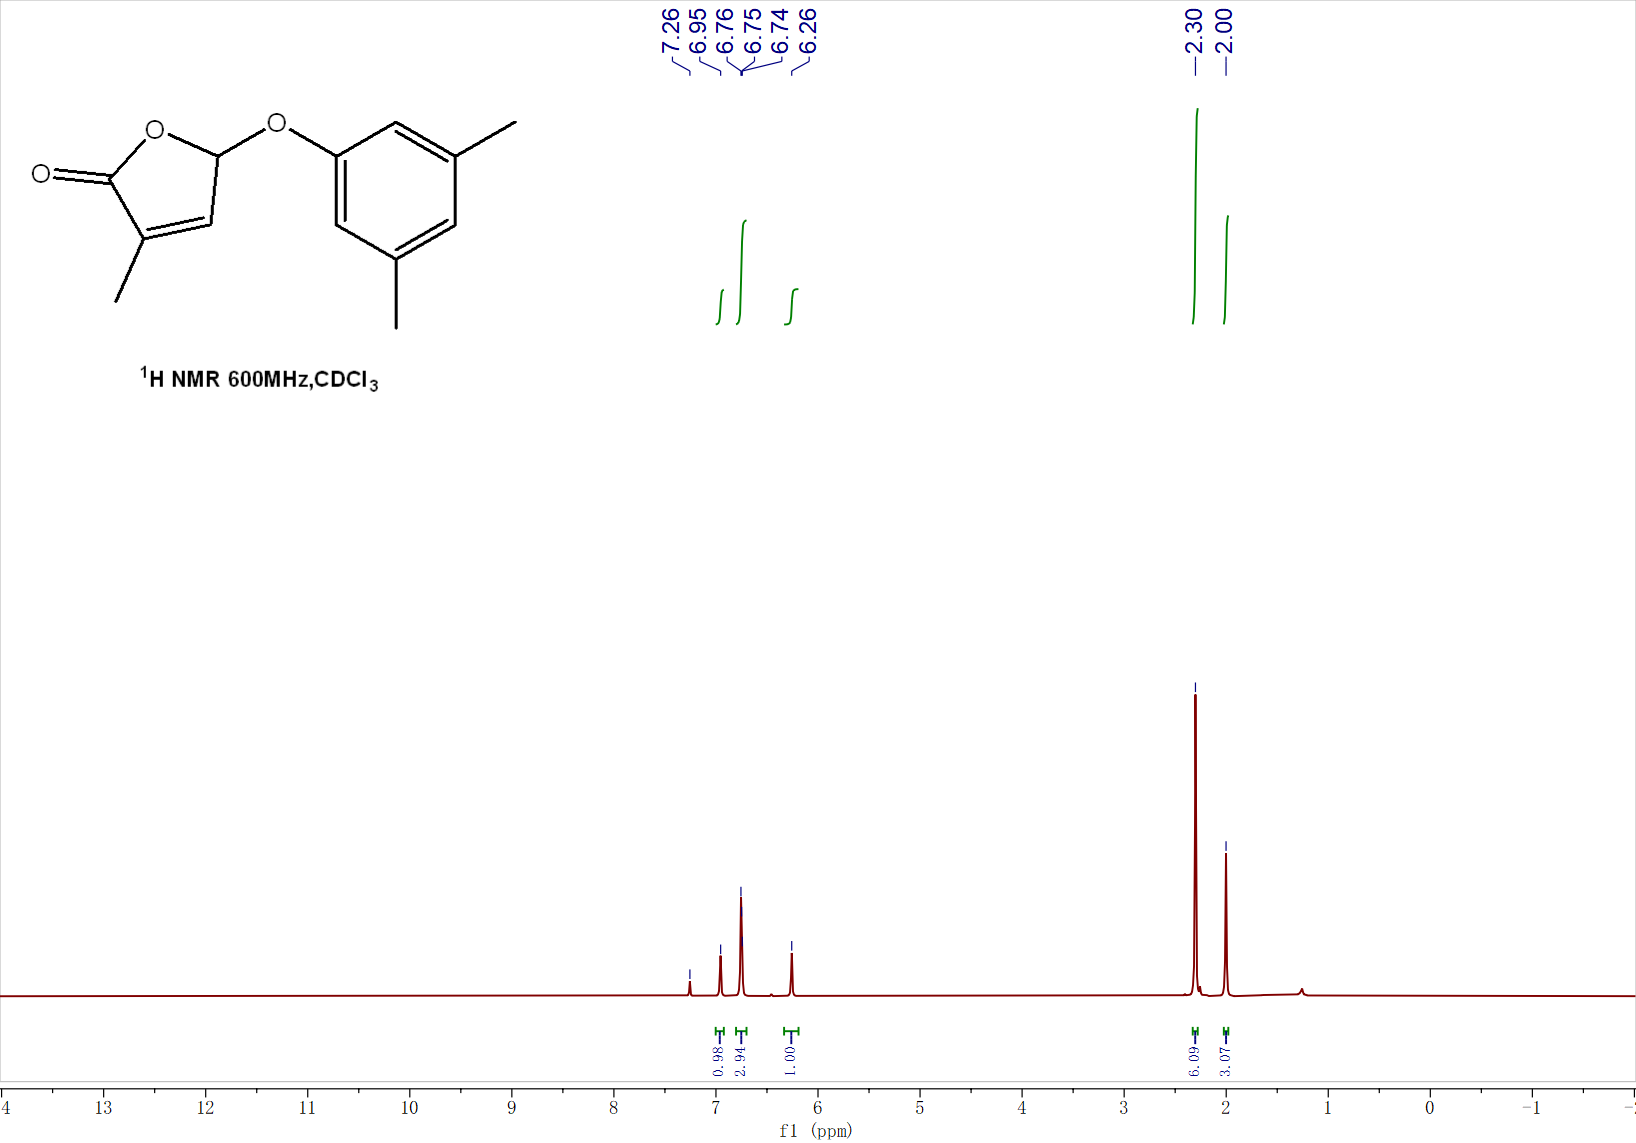


**13C NMR of 3g**


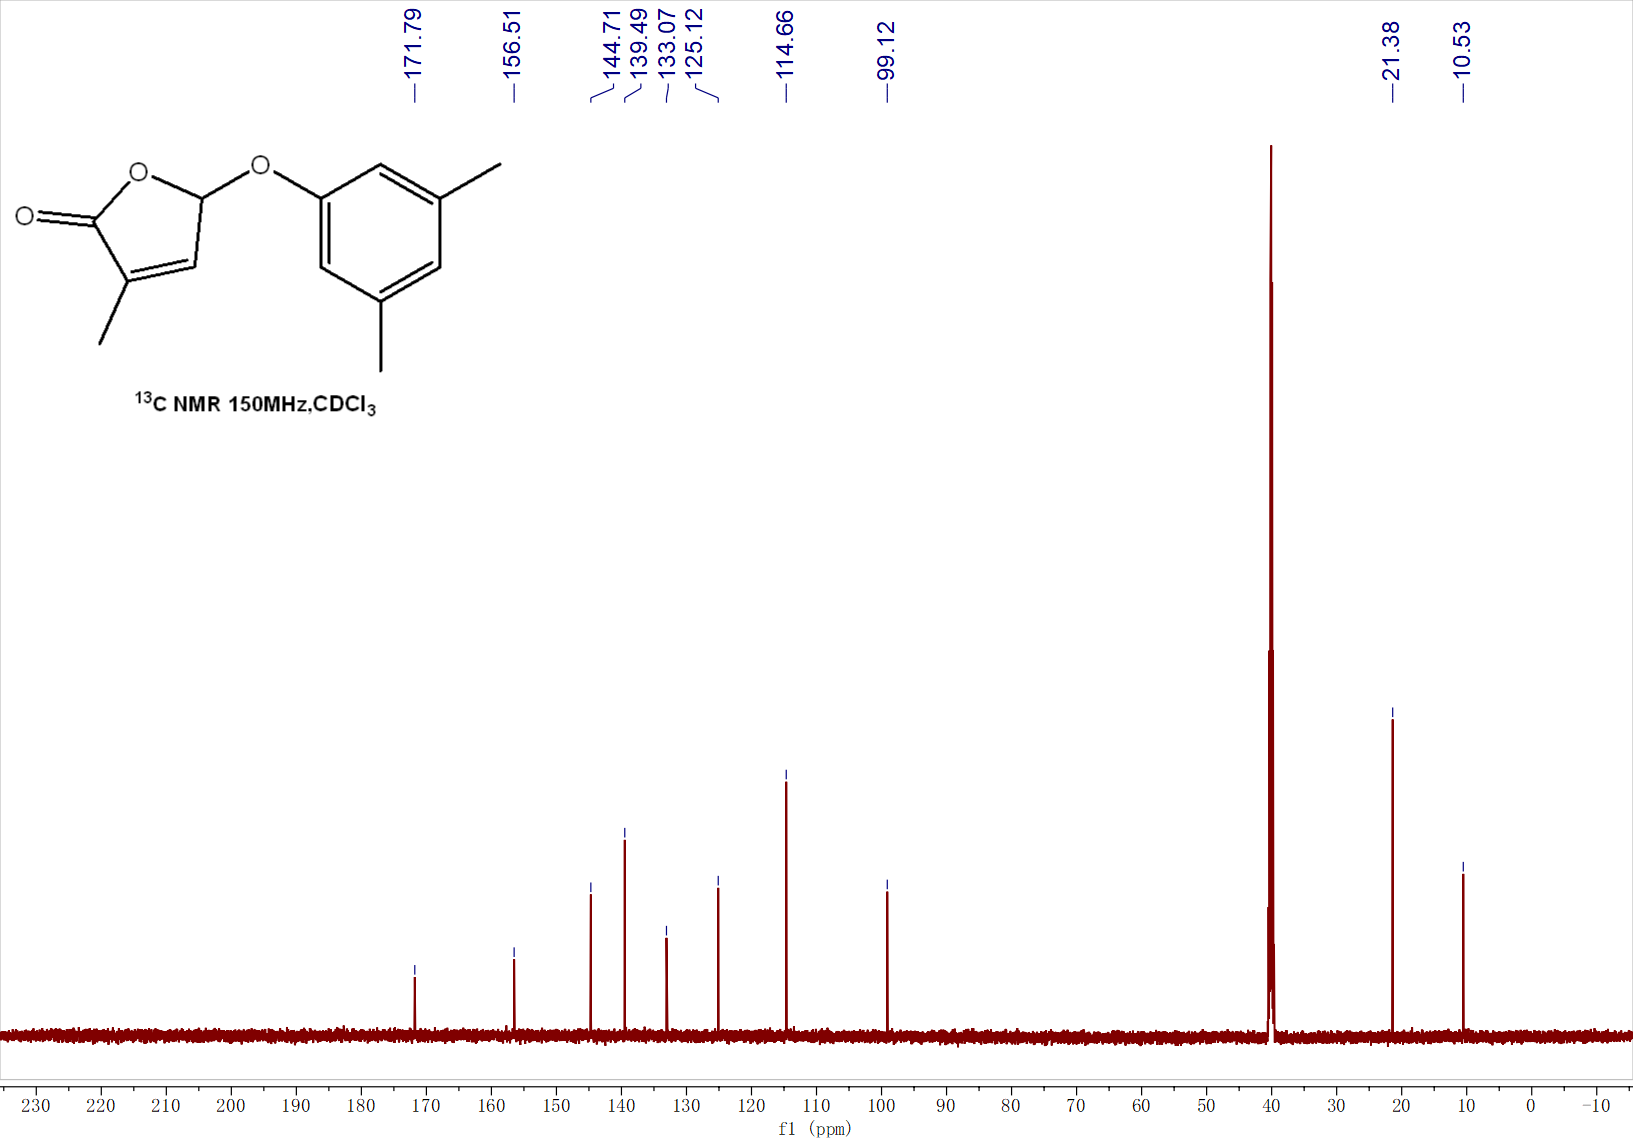


**1H NMR of 3h**


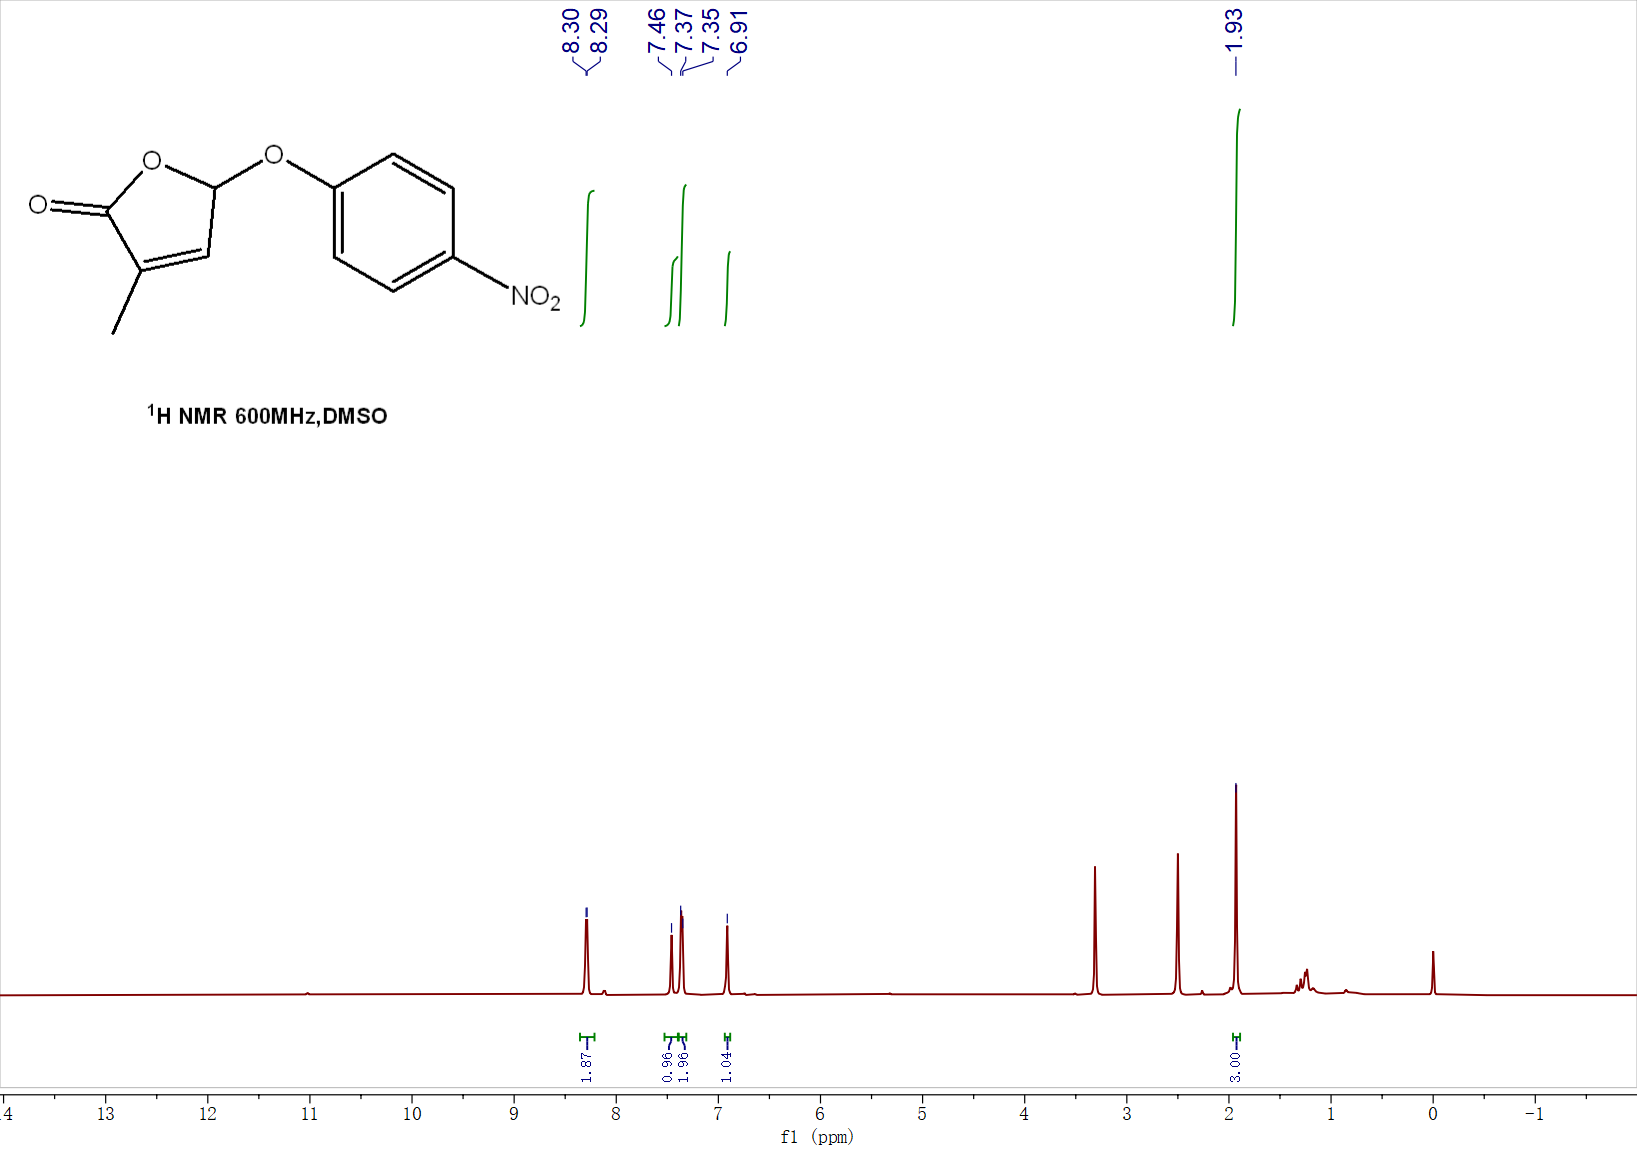


**13C NMR of 3h**


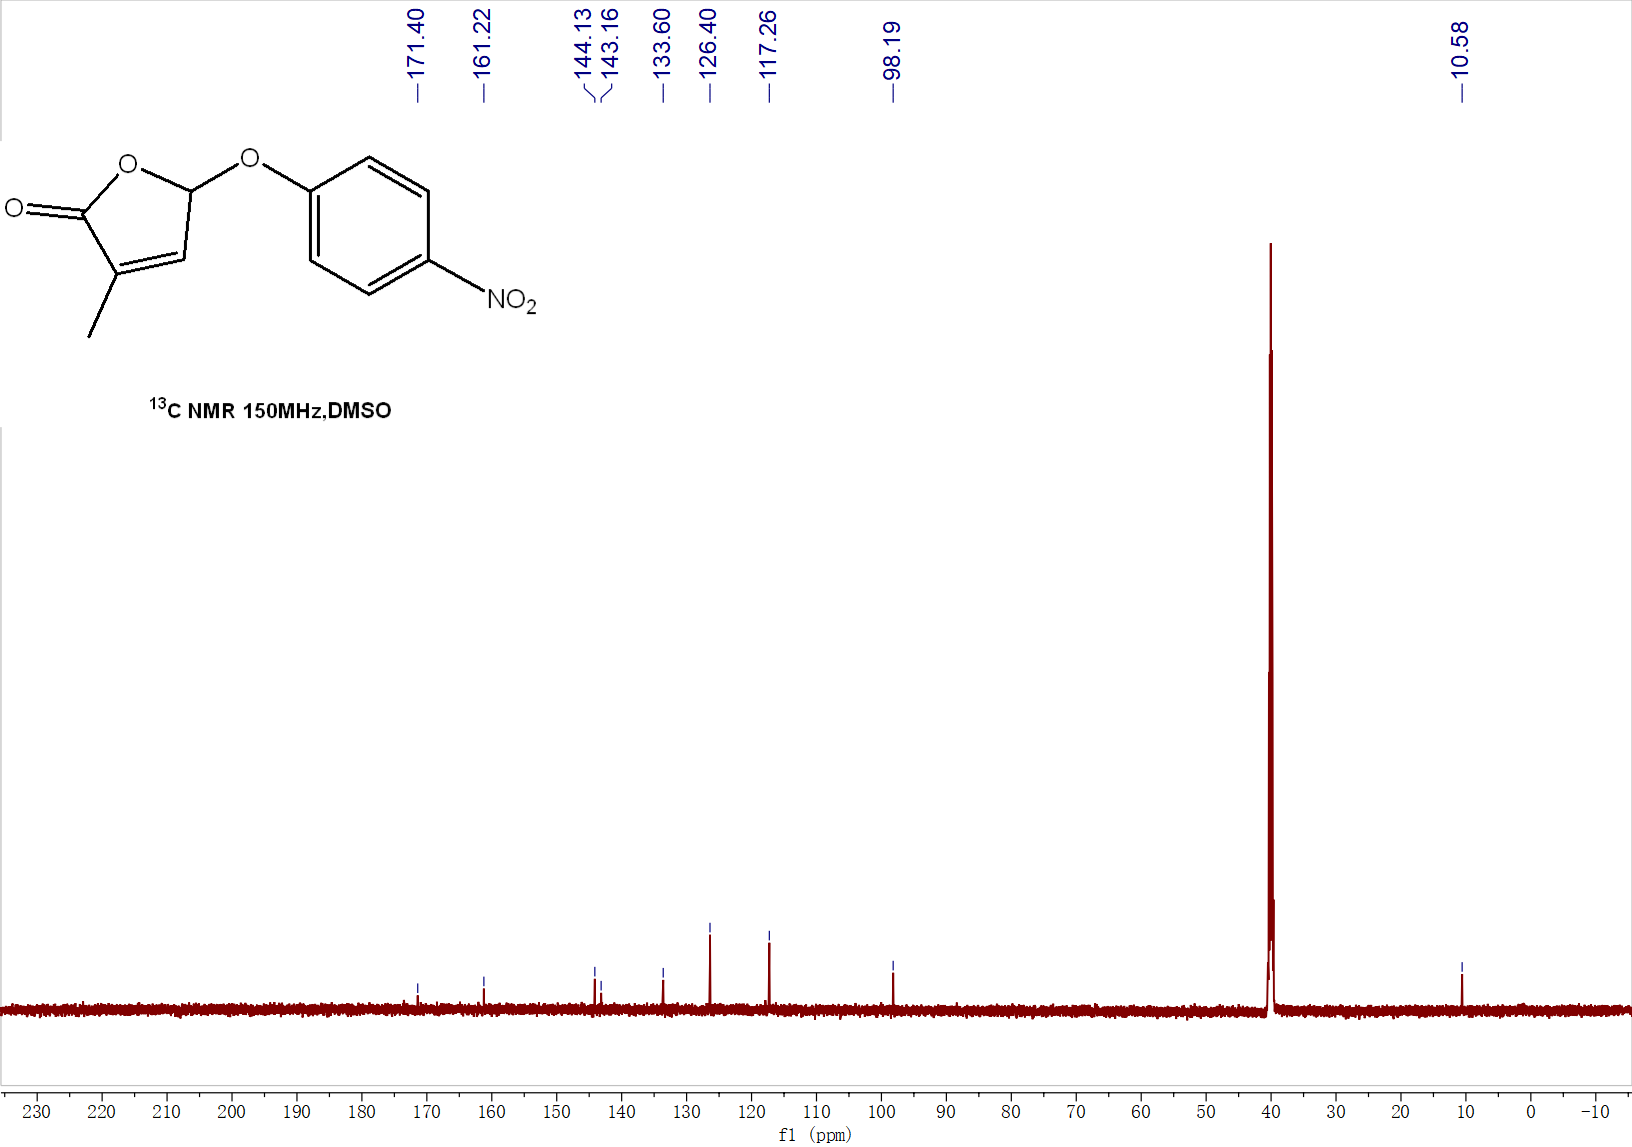


**1H NMR of 3i**


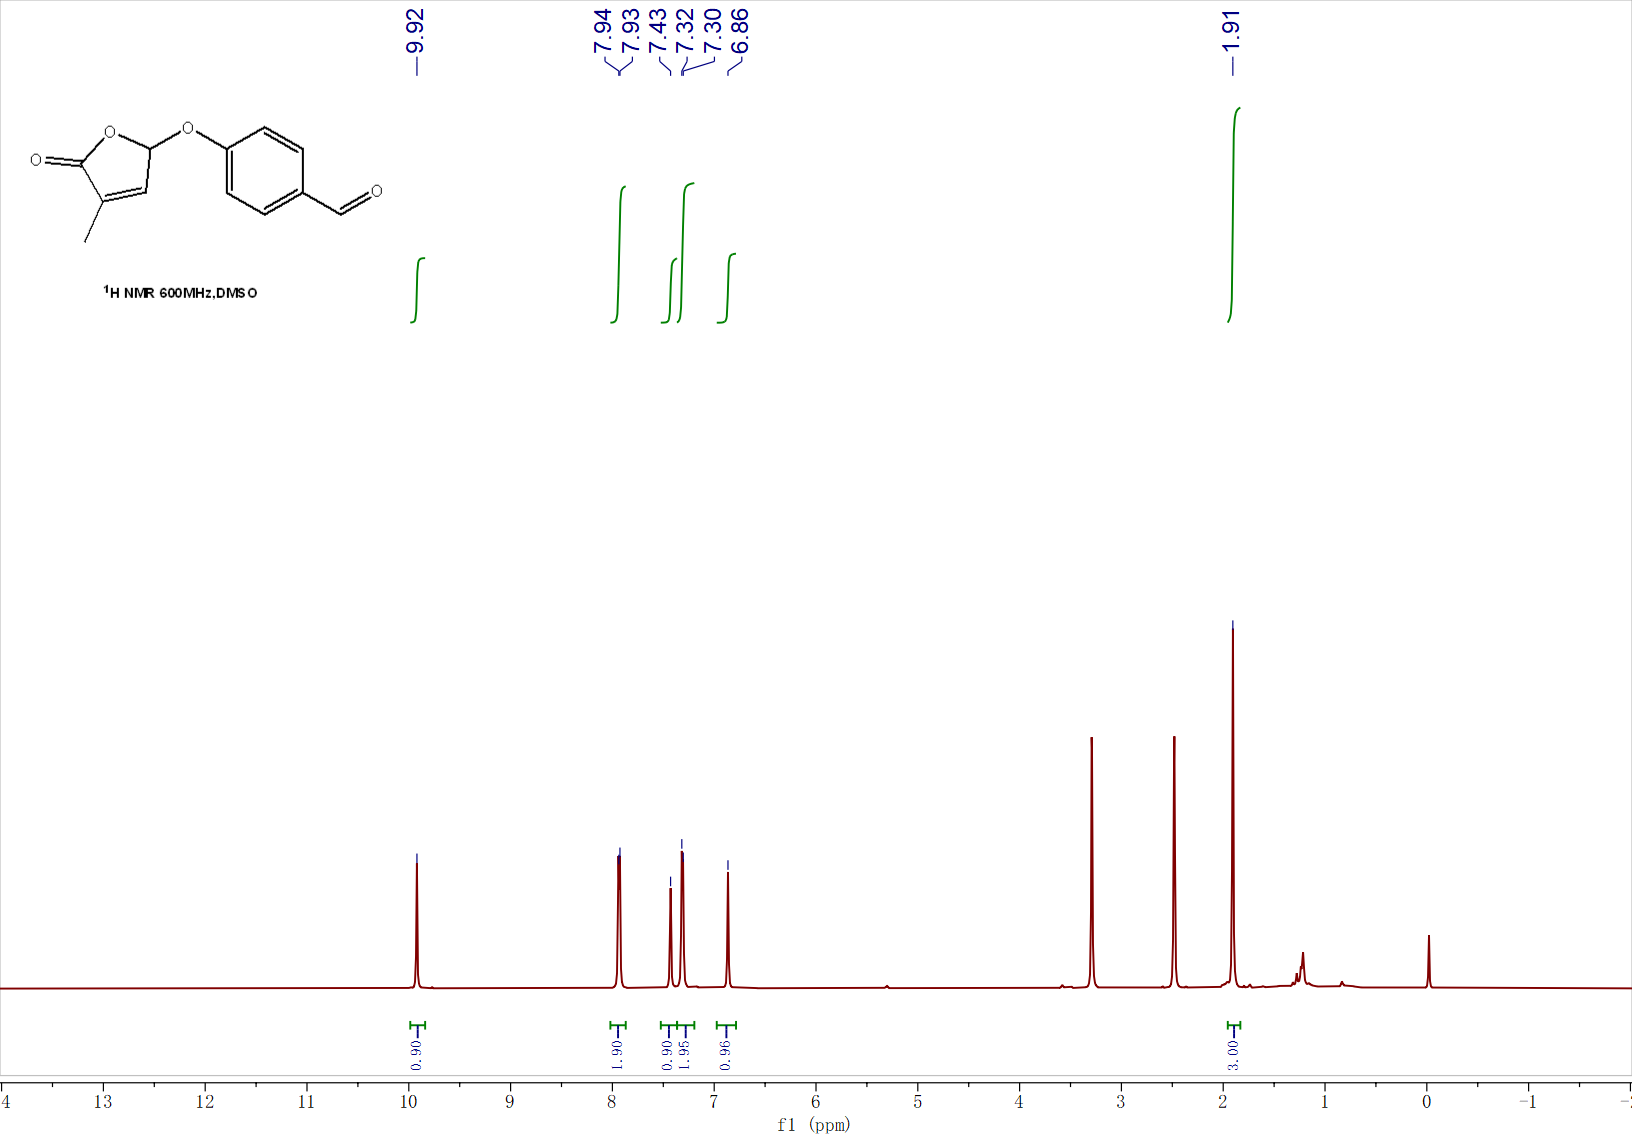


**13C NMR of 3i**


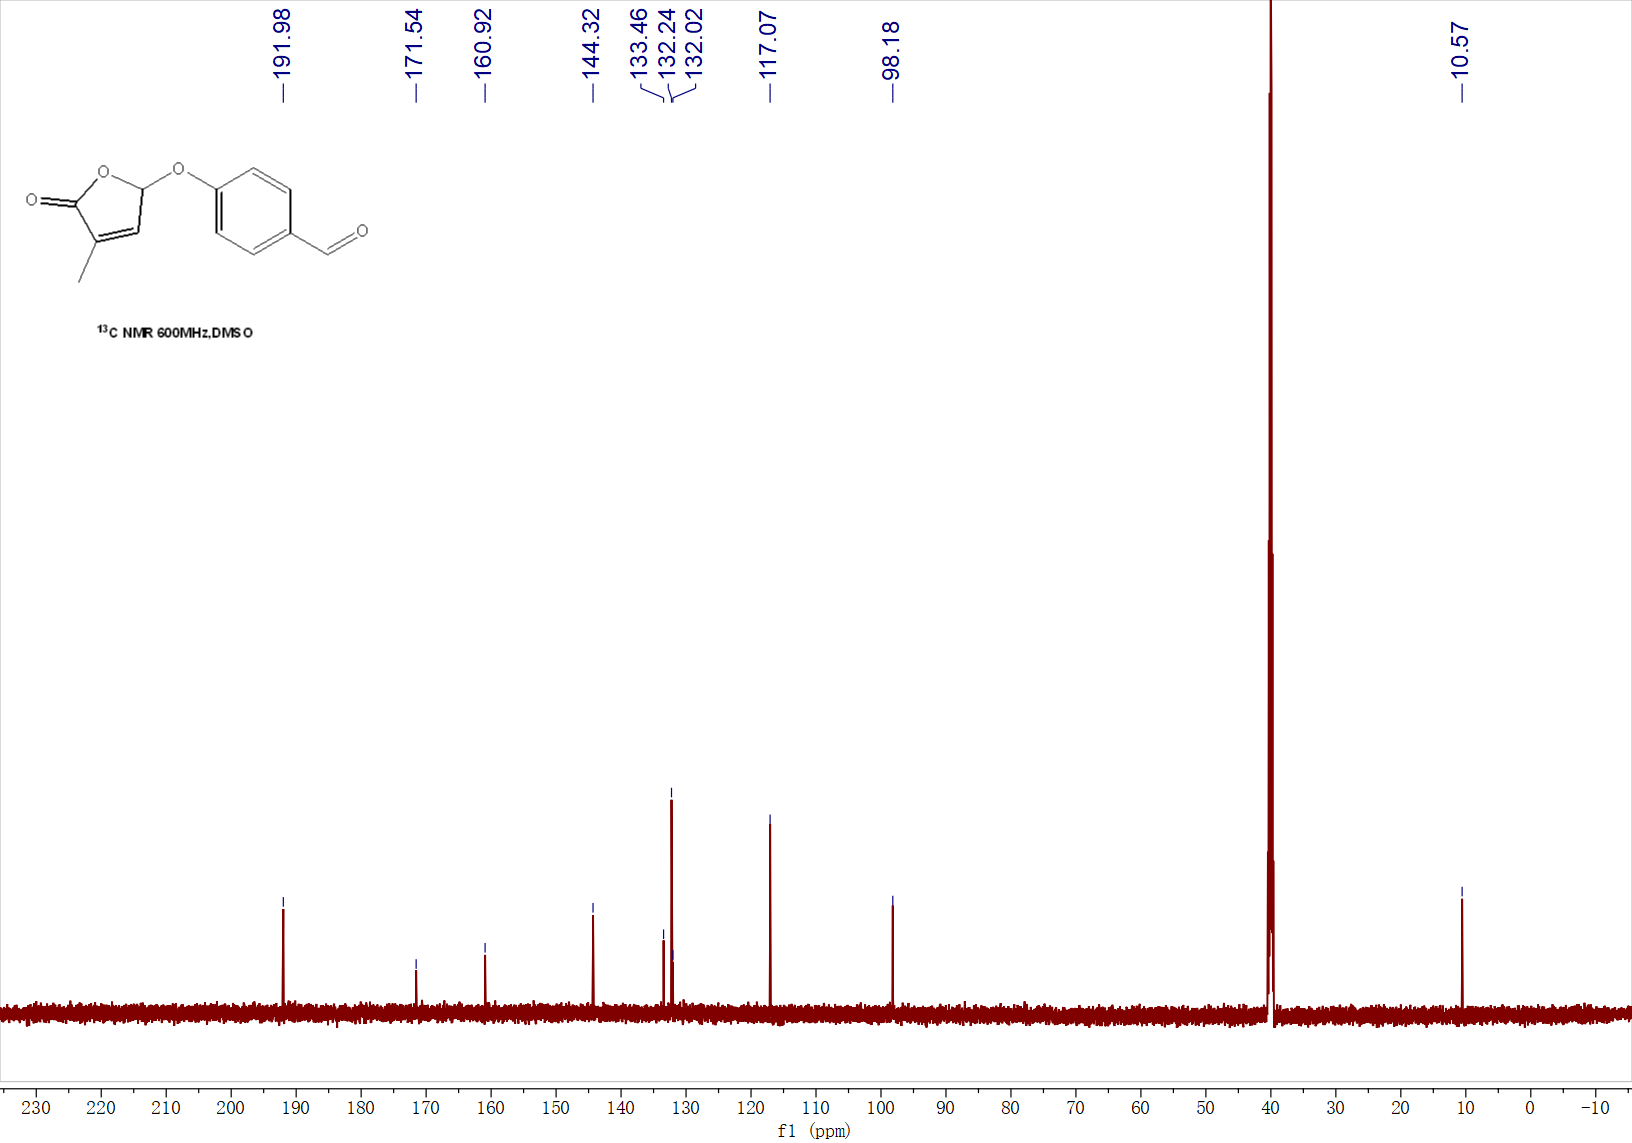


**1H NMR of 3j**


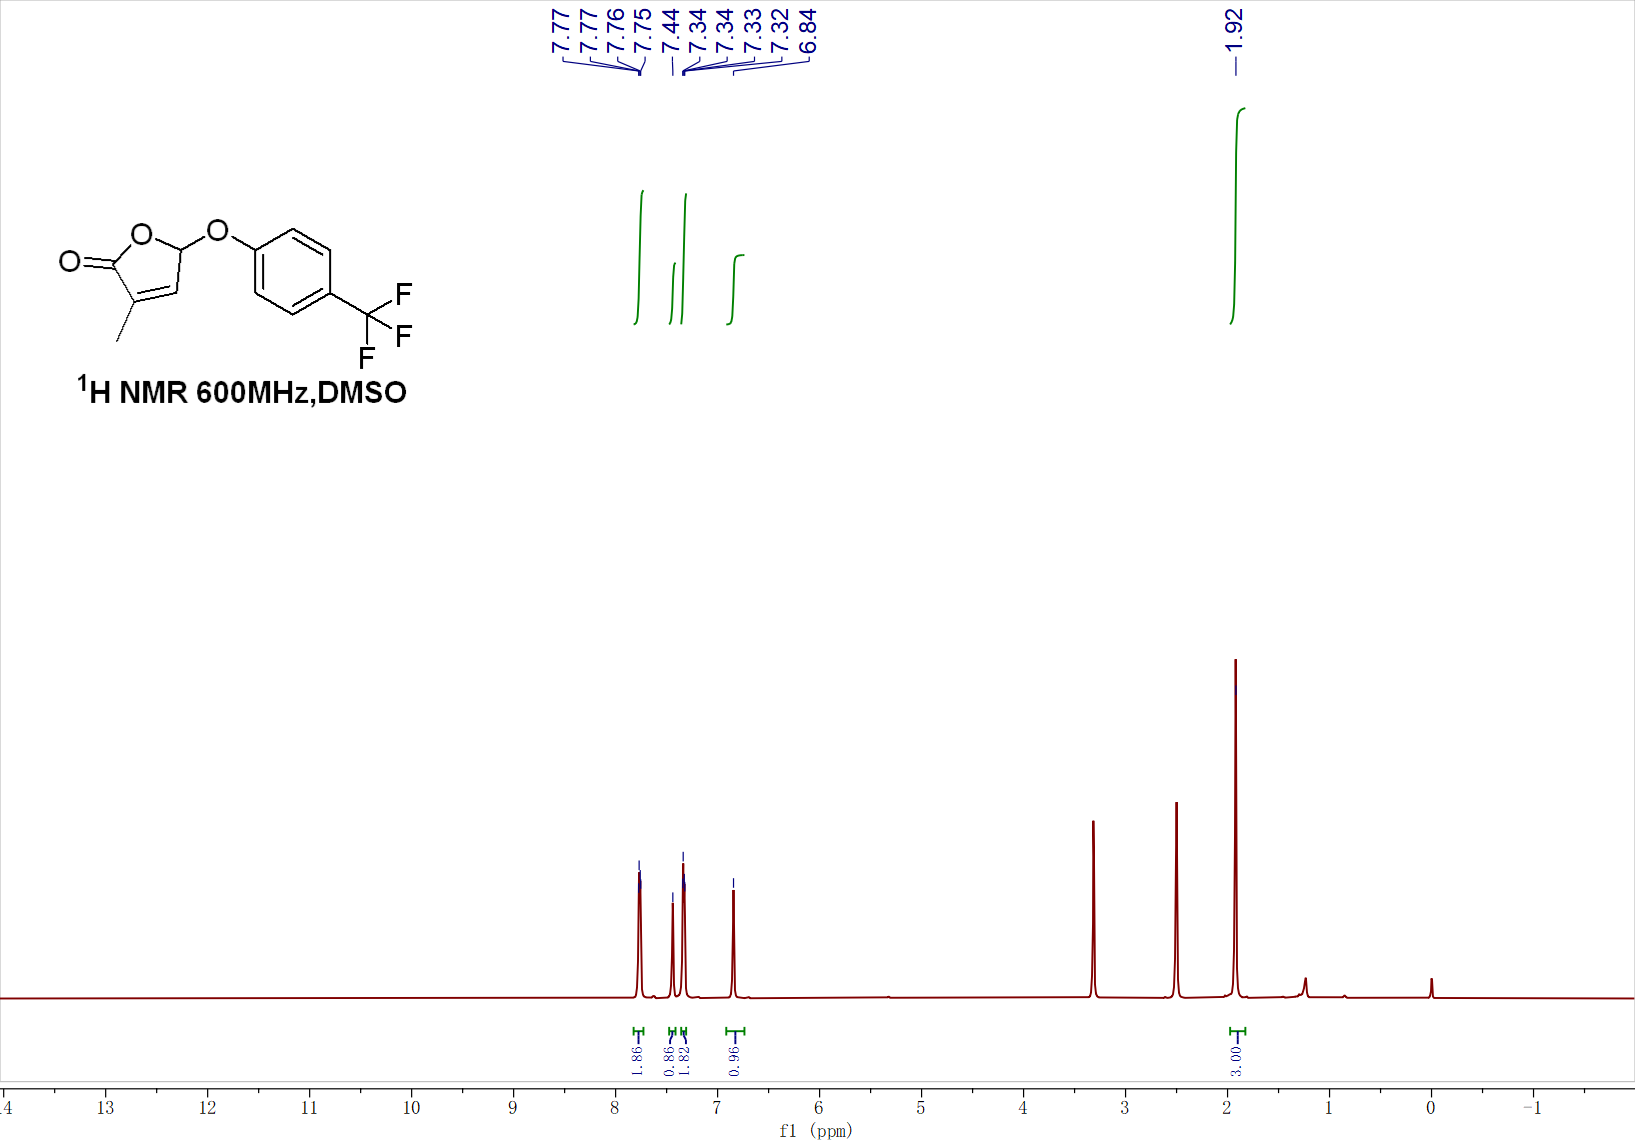


**13C NMR of 3j**


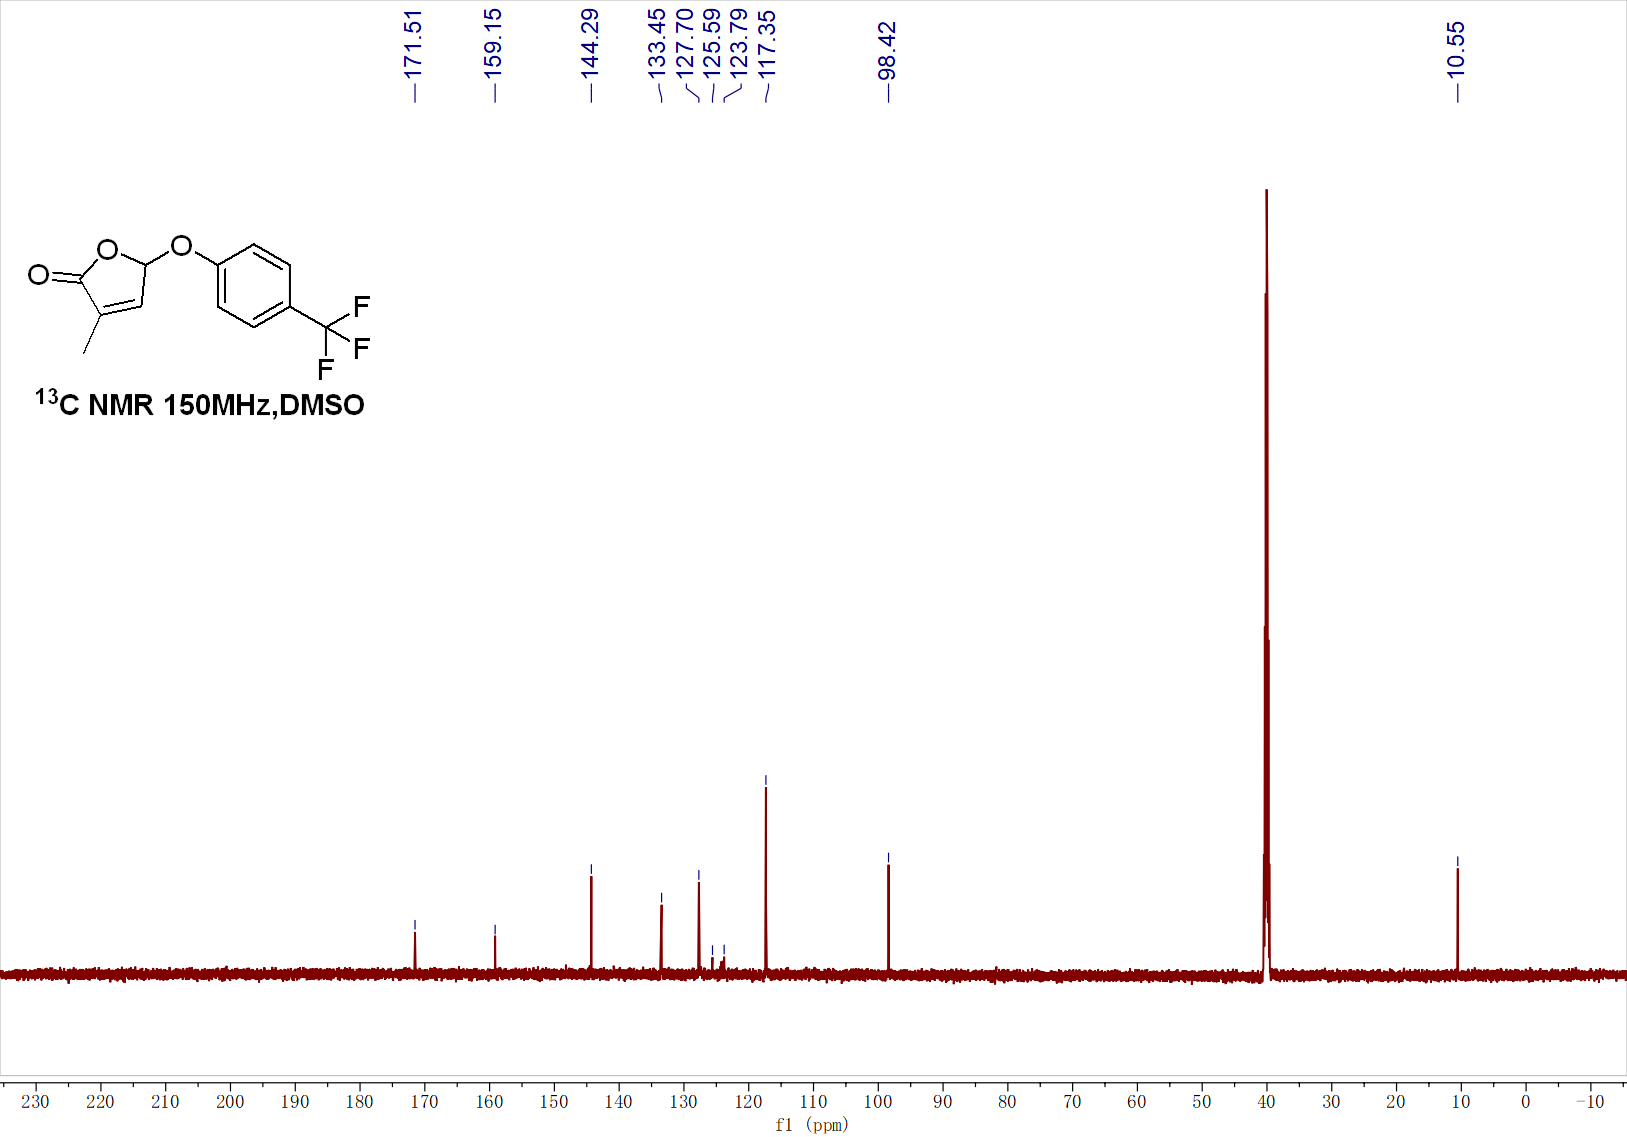


**1H NMR of 3k**


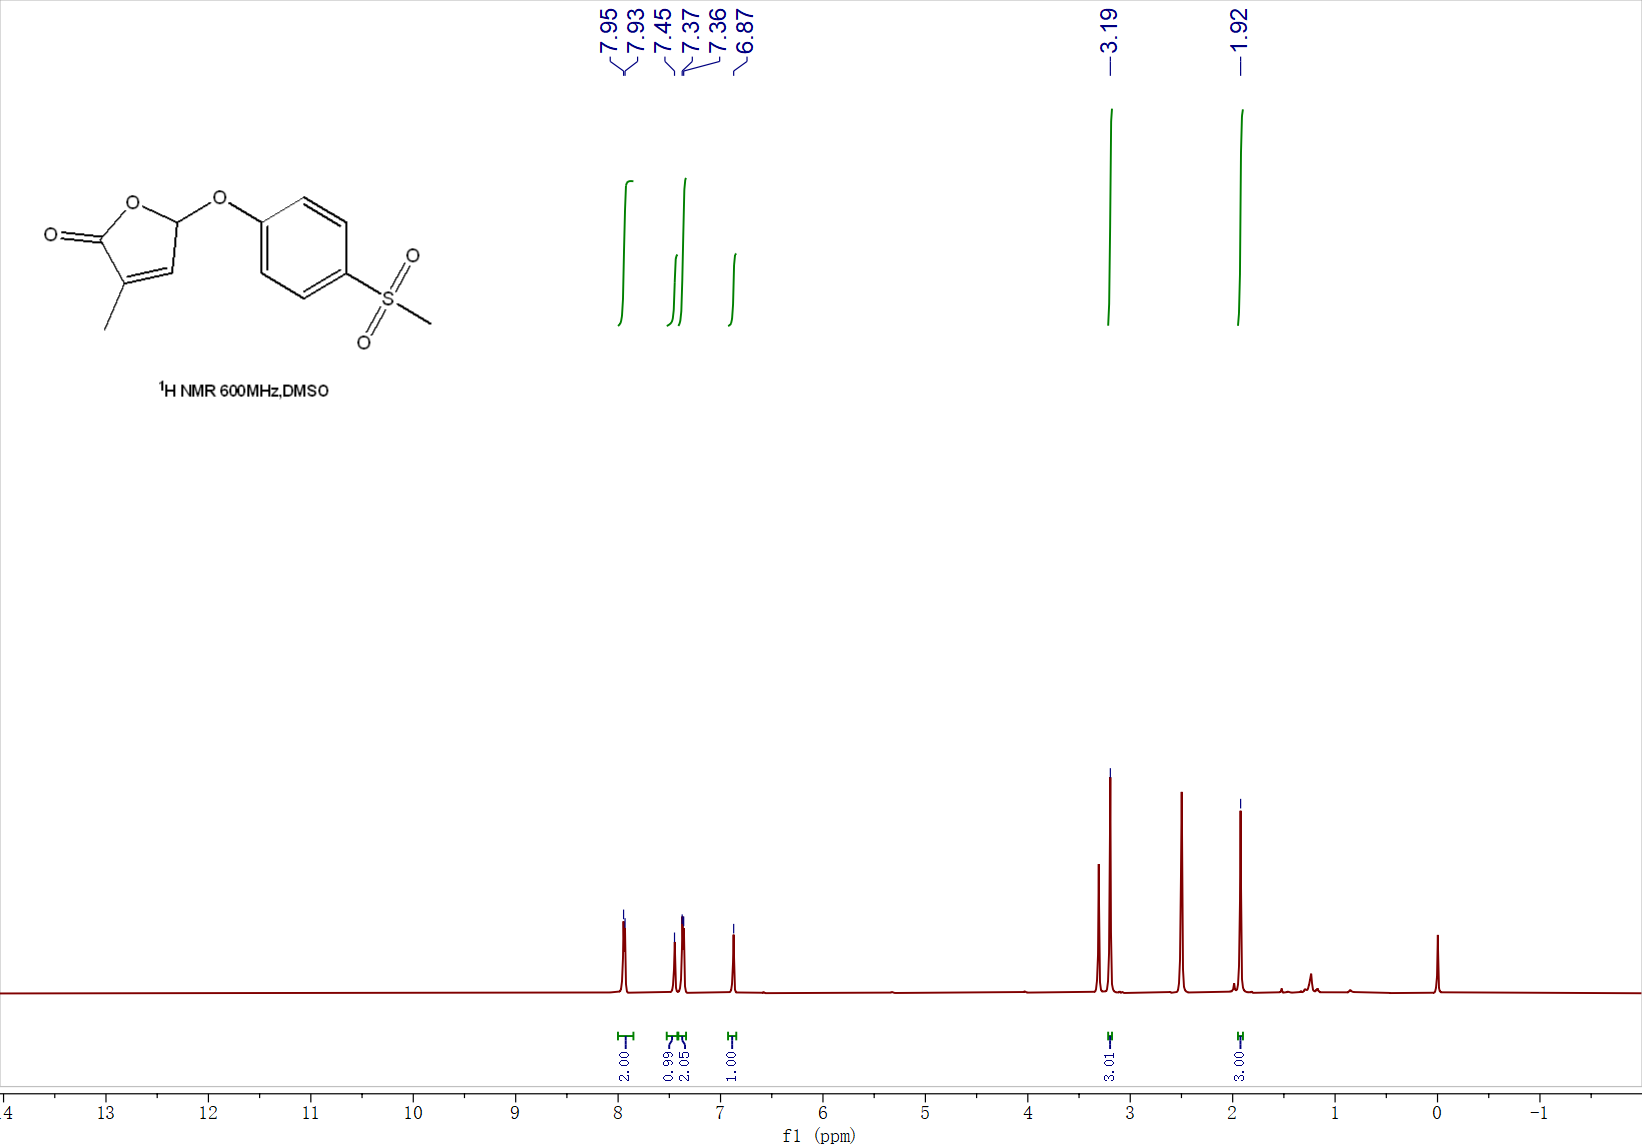


**13C NMR of 3k**


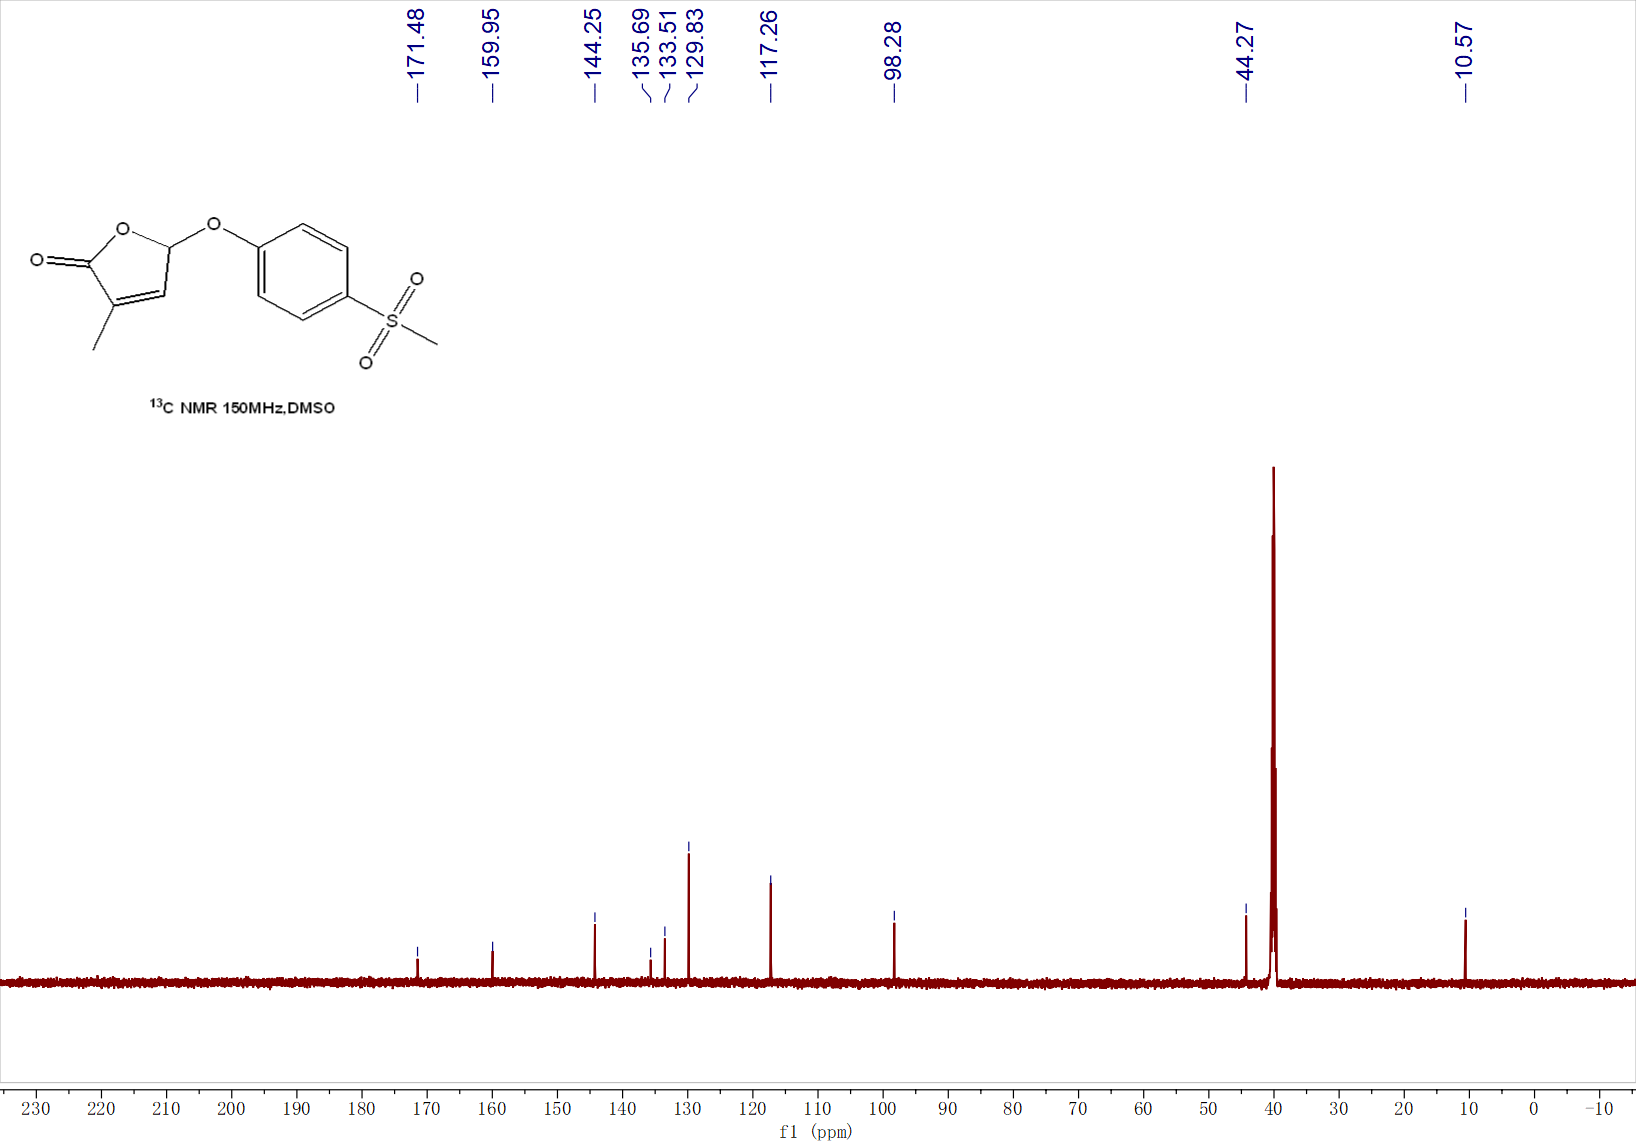


**1H NMR of 3l**


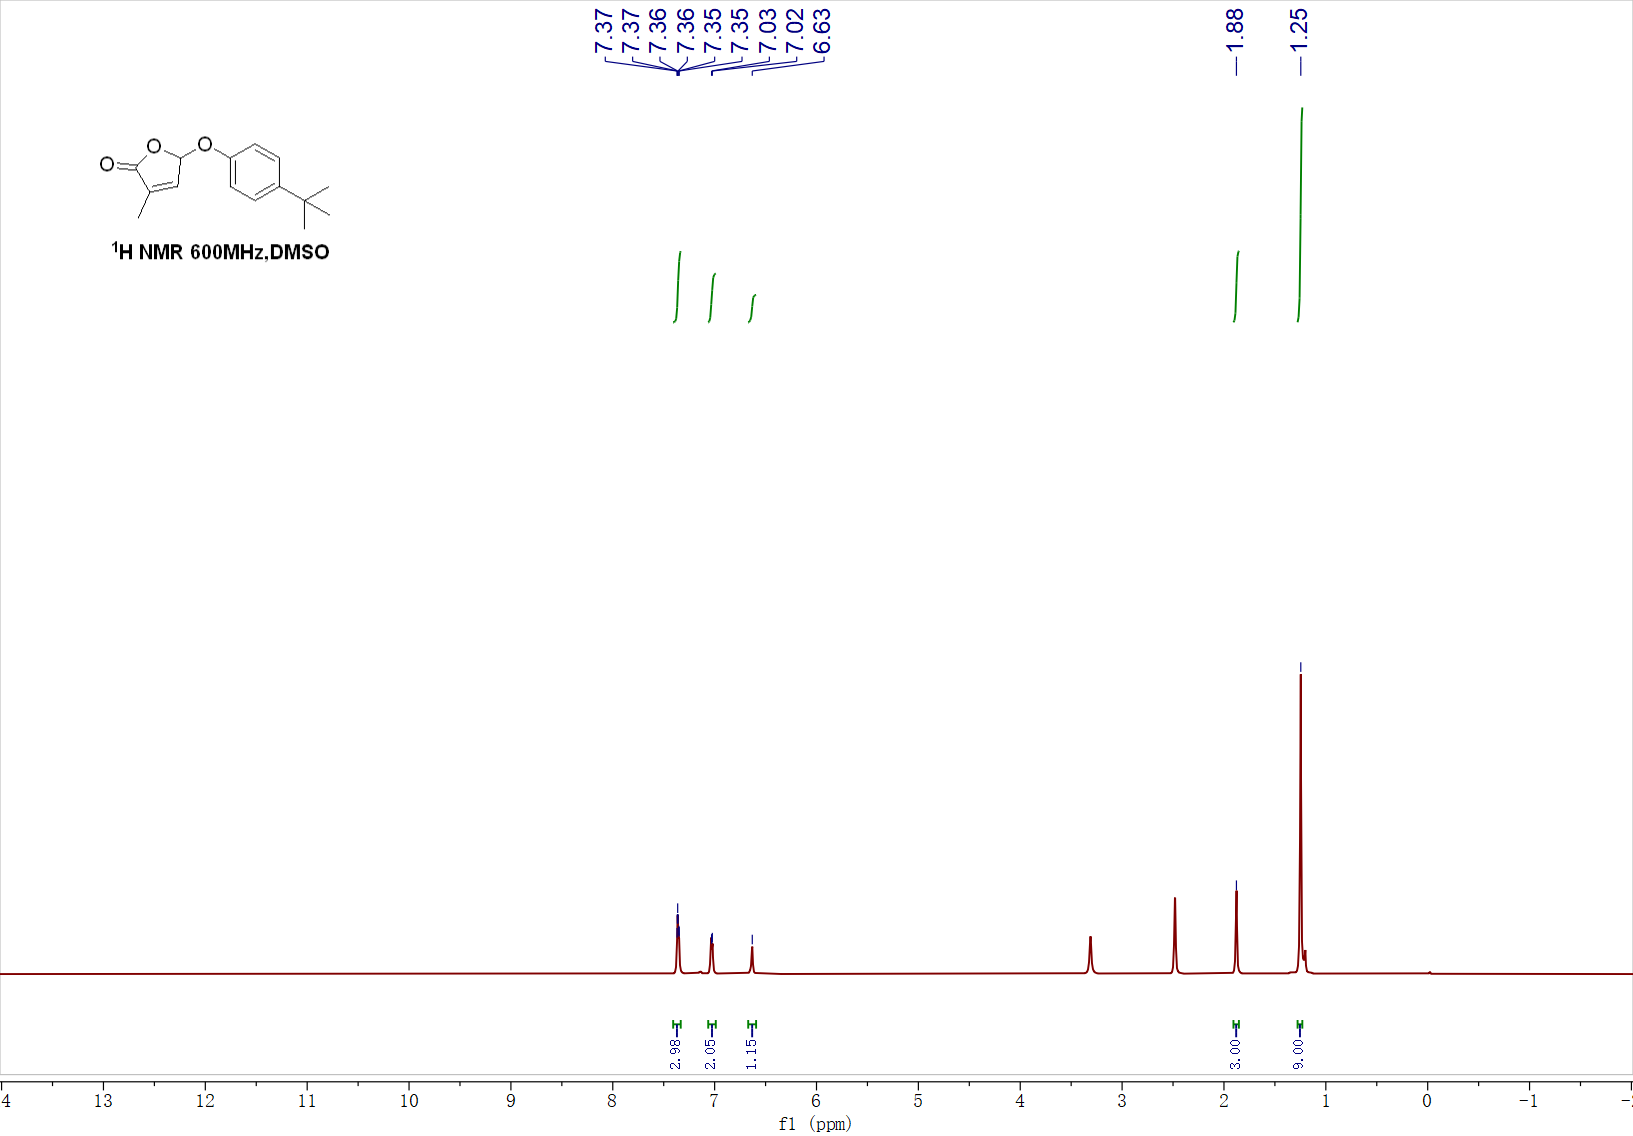


**13C NMR of 3l**


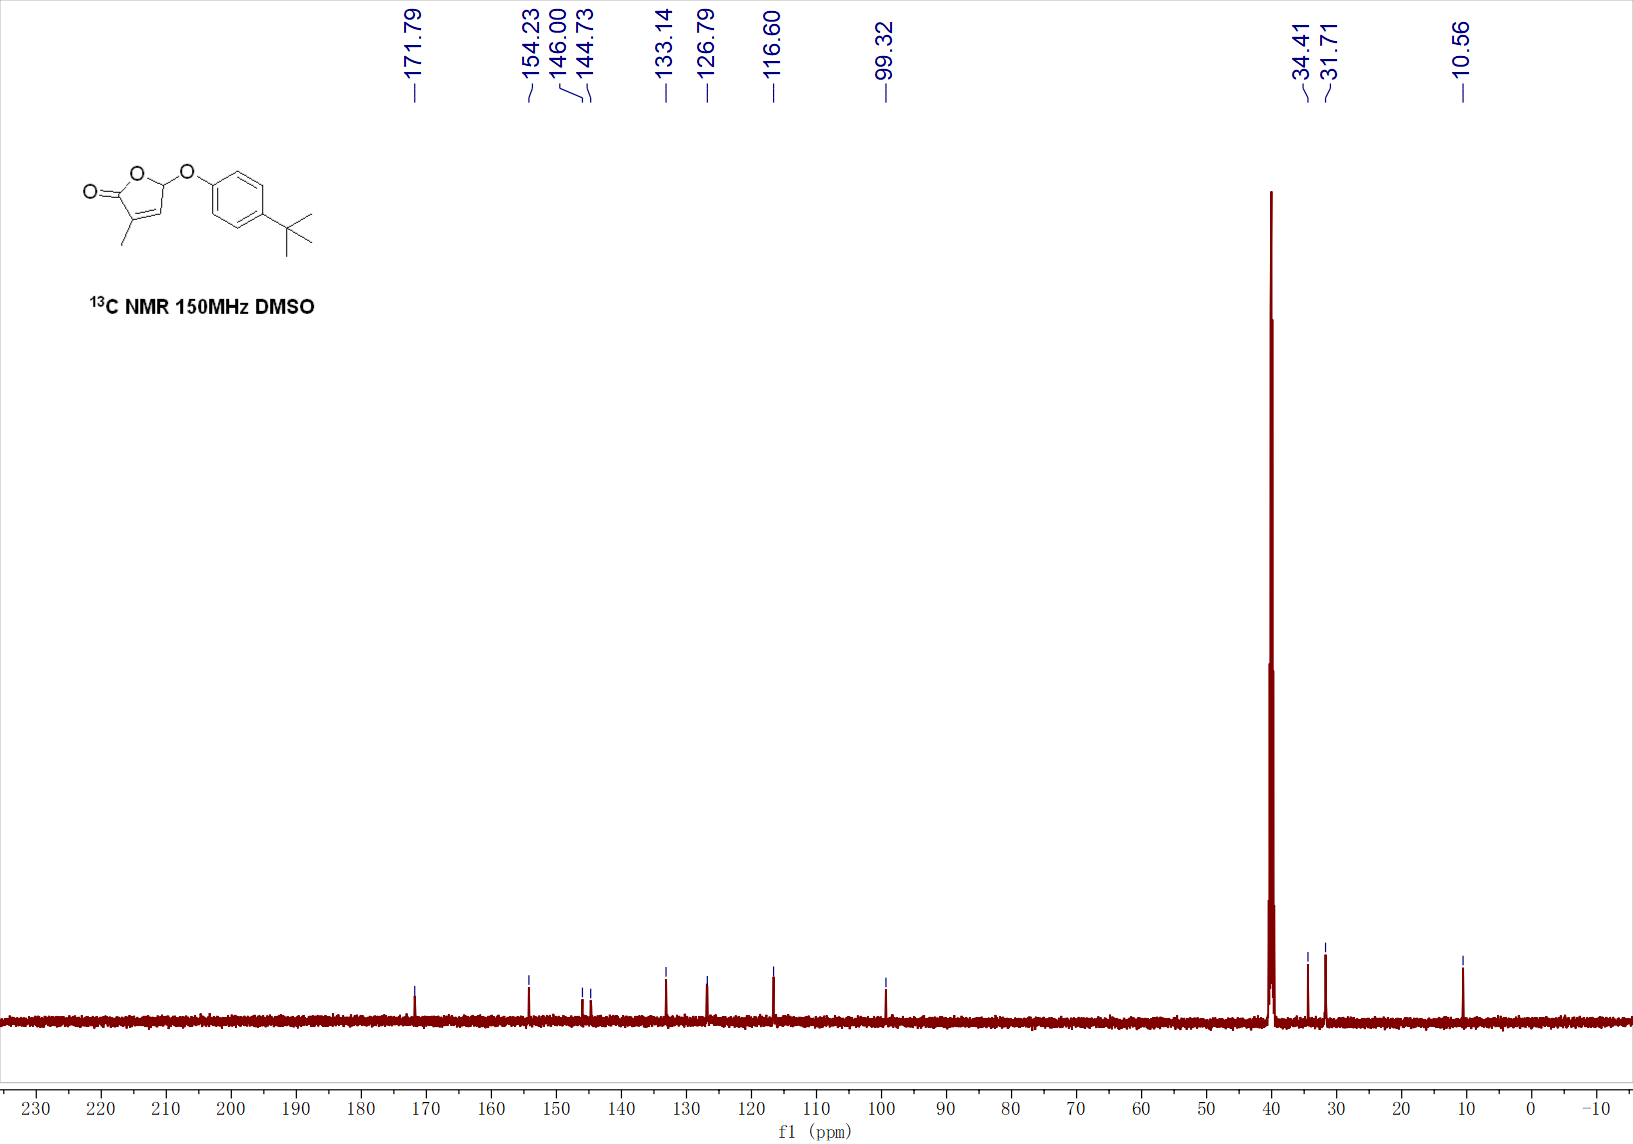


**1H NMR of 3m**


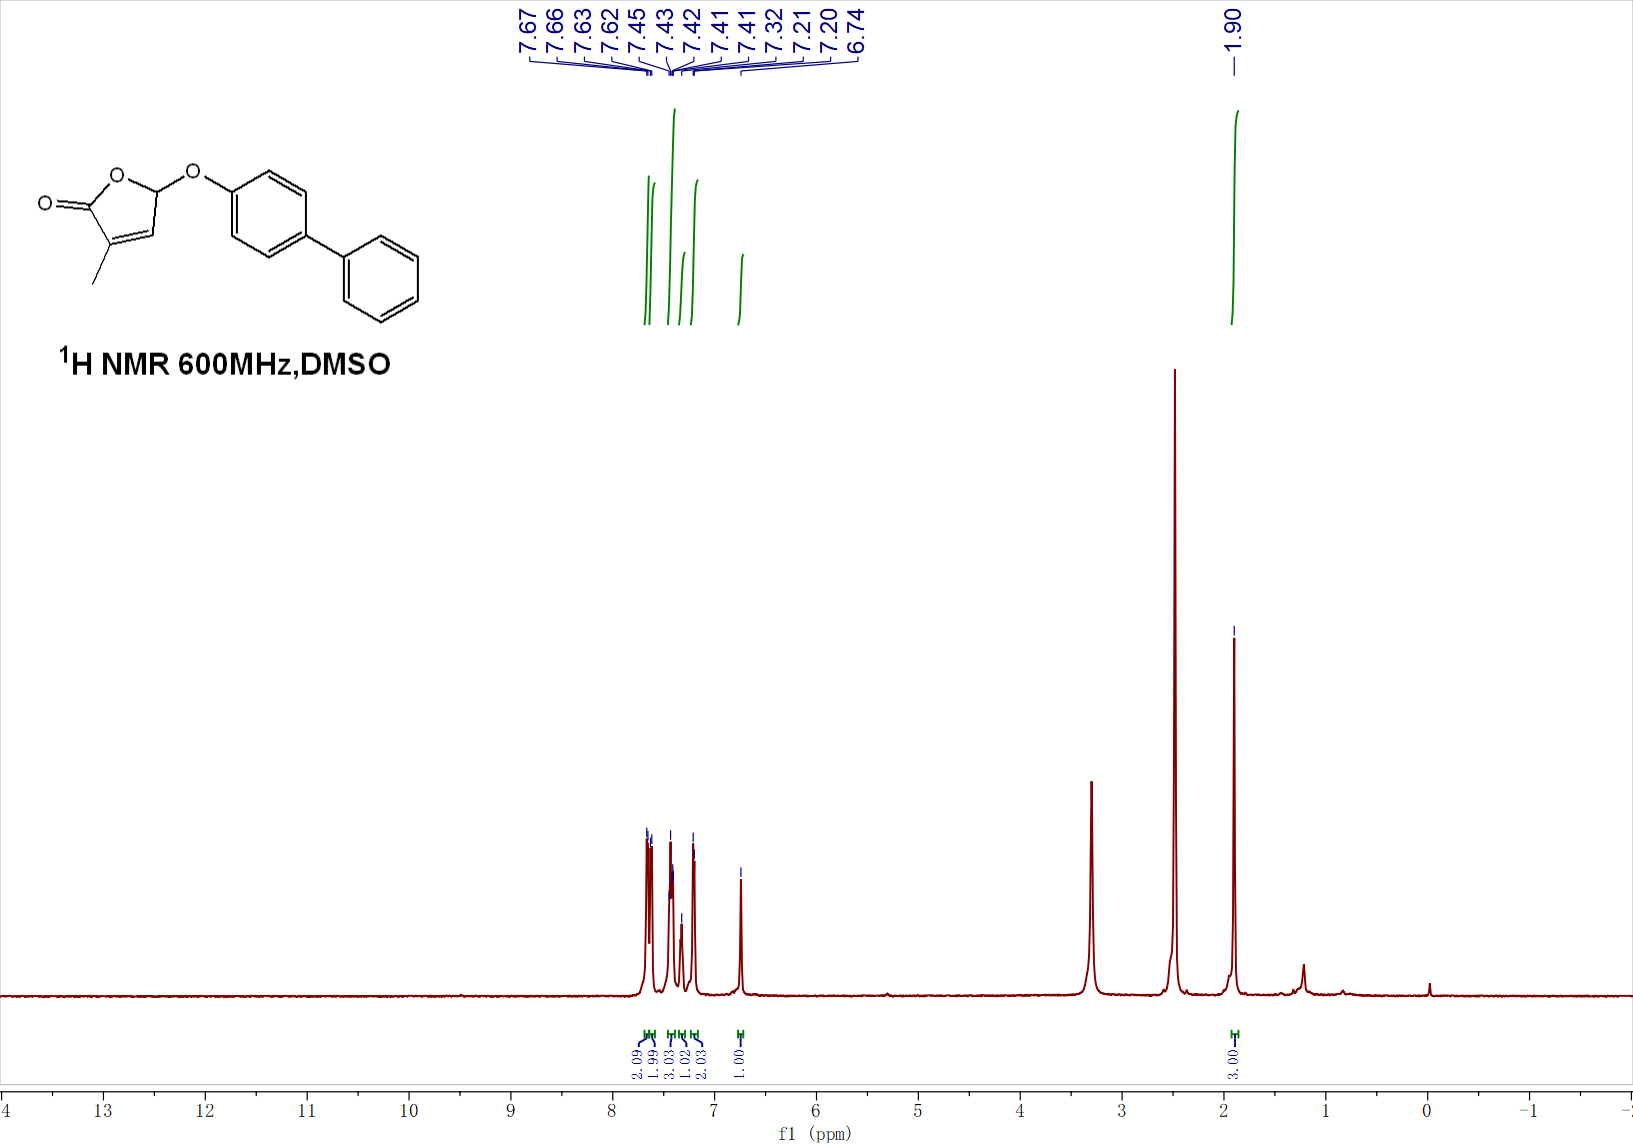


**13C NMR of 3m**


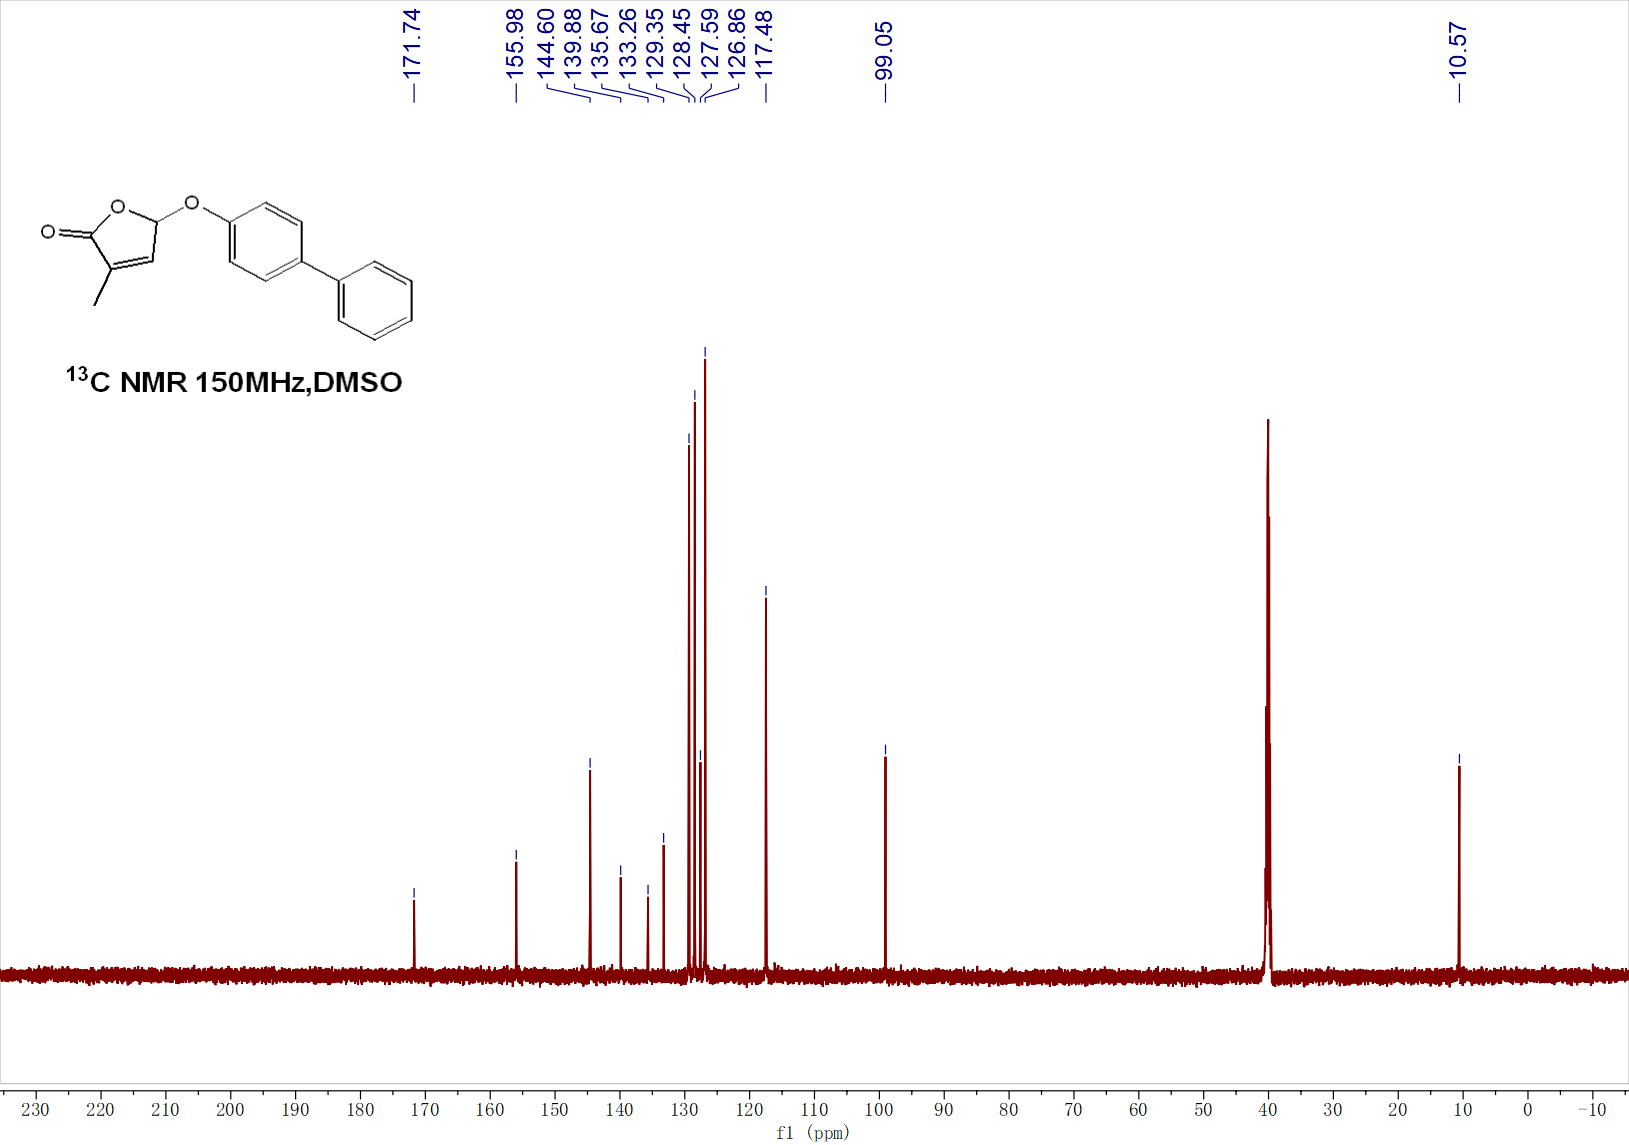


**1H NMR of 3n**


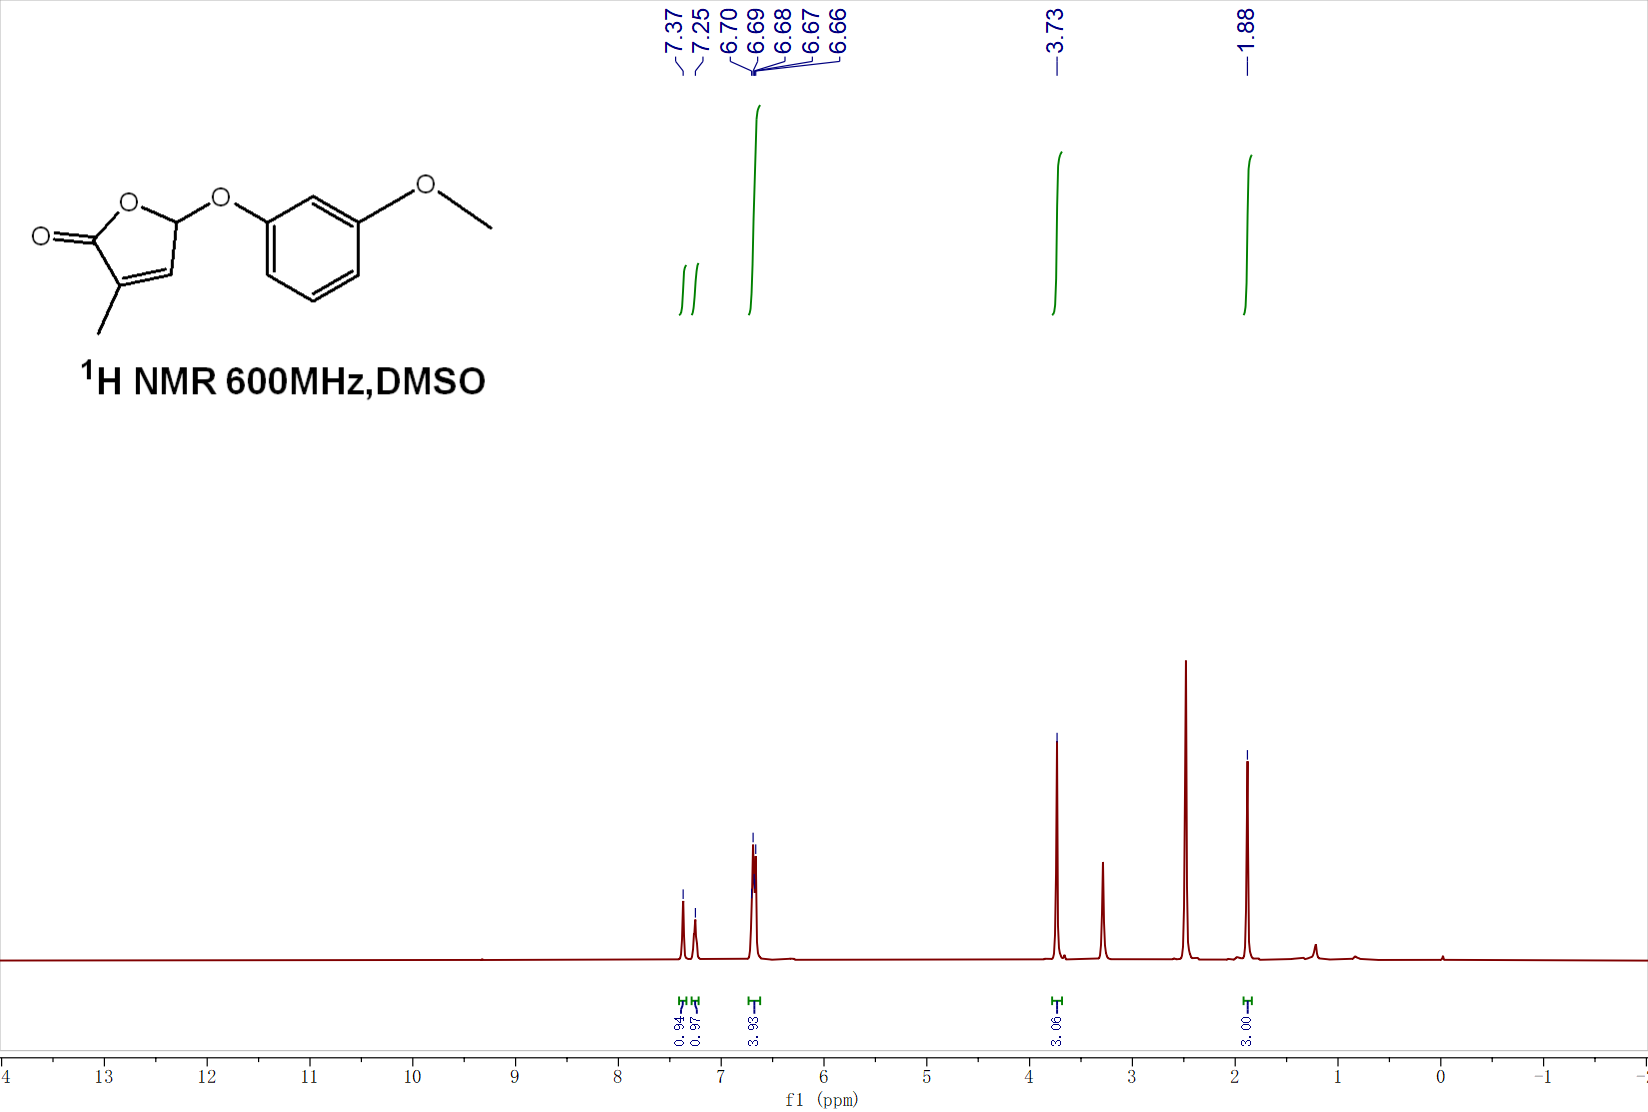


**13C NMR of 3n**


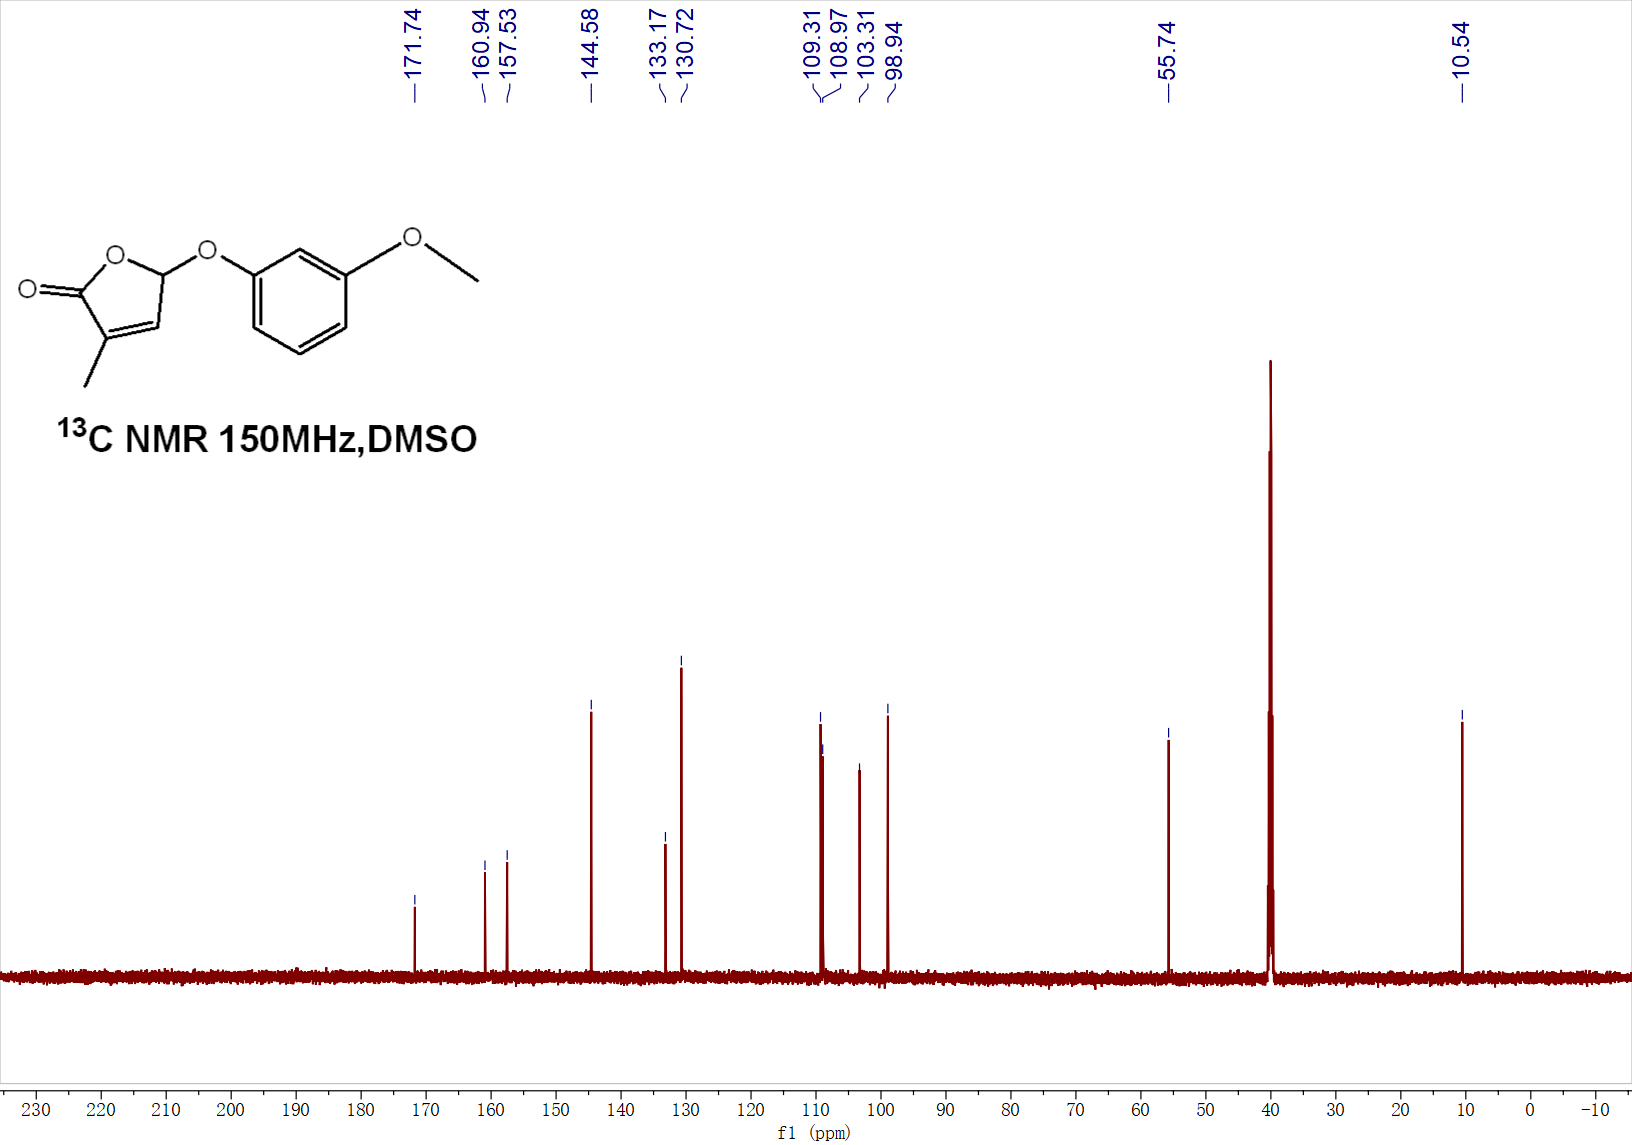


**1H NMR of 3o**


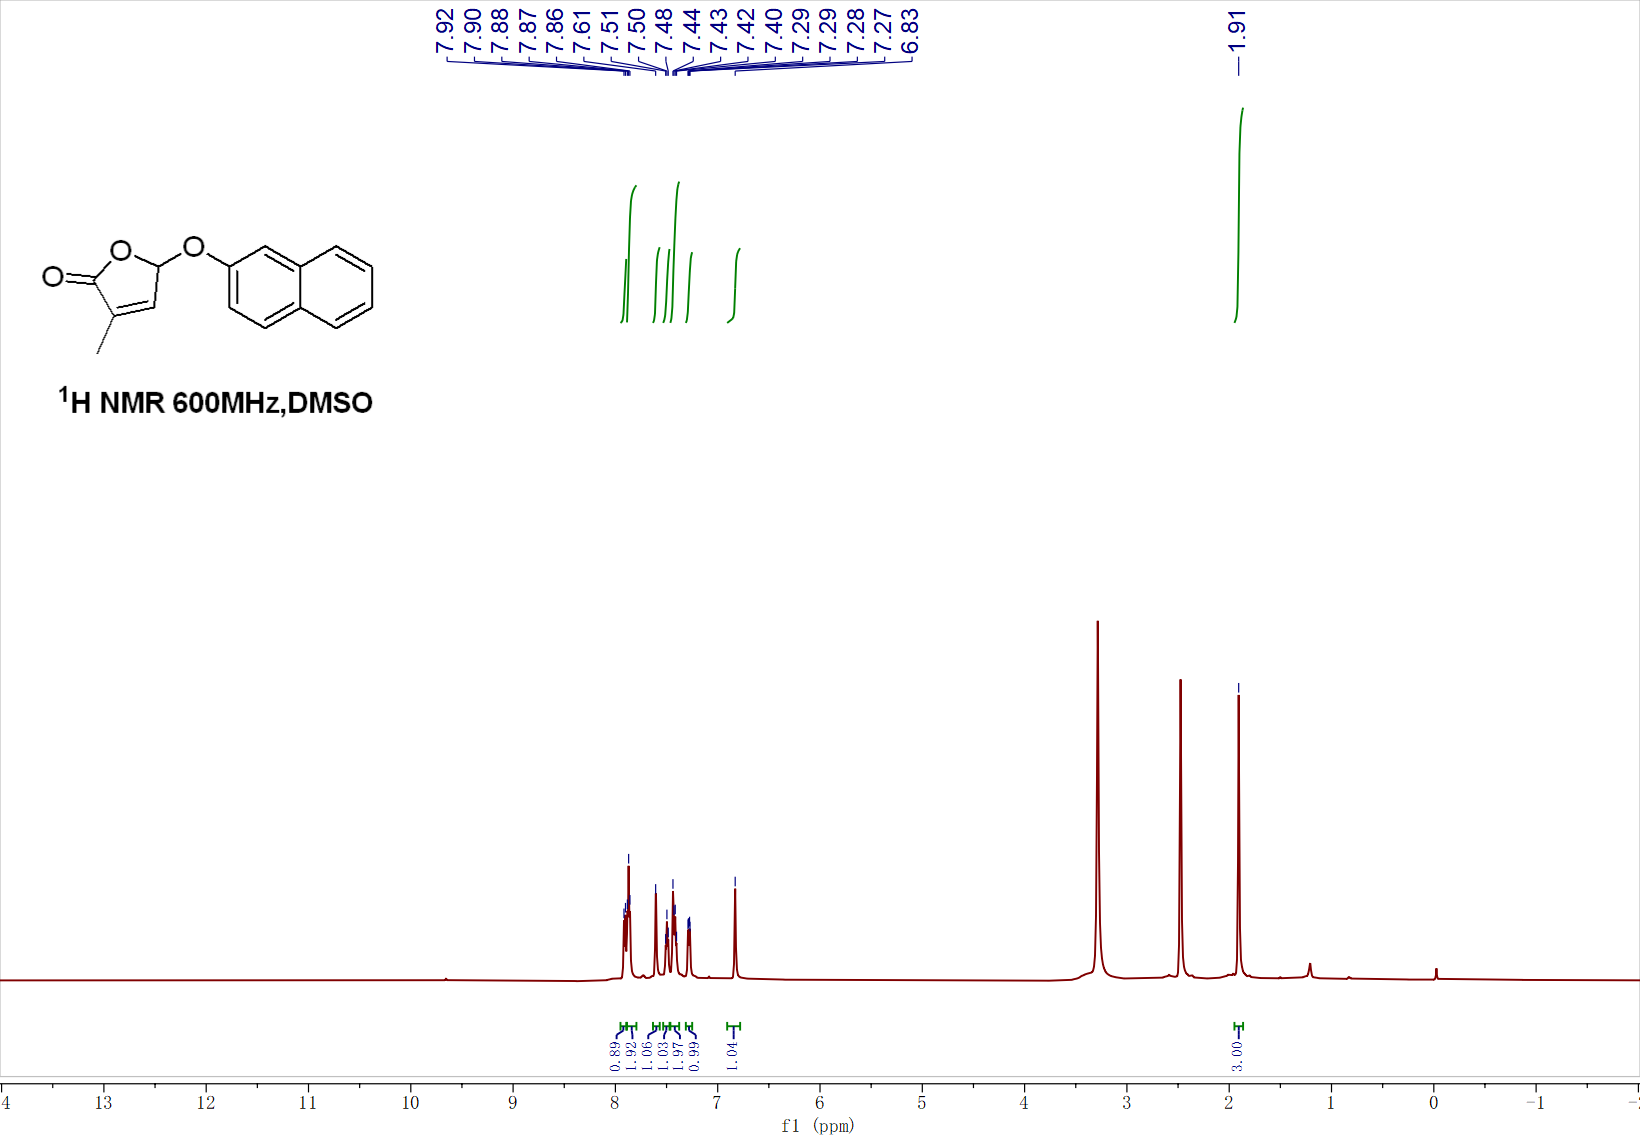


**13C NMR of 3o**


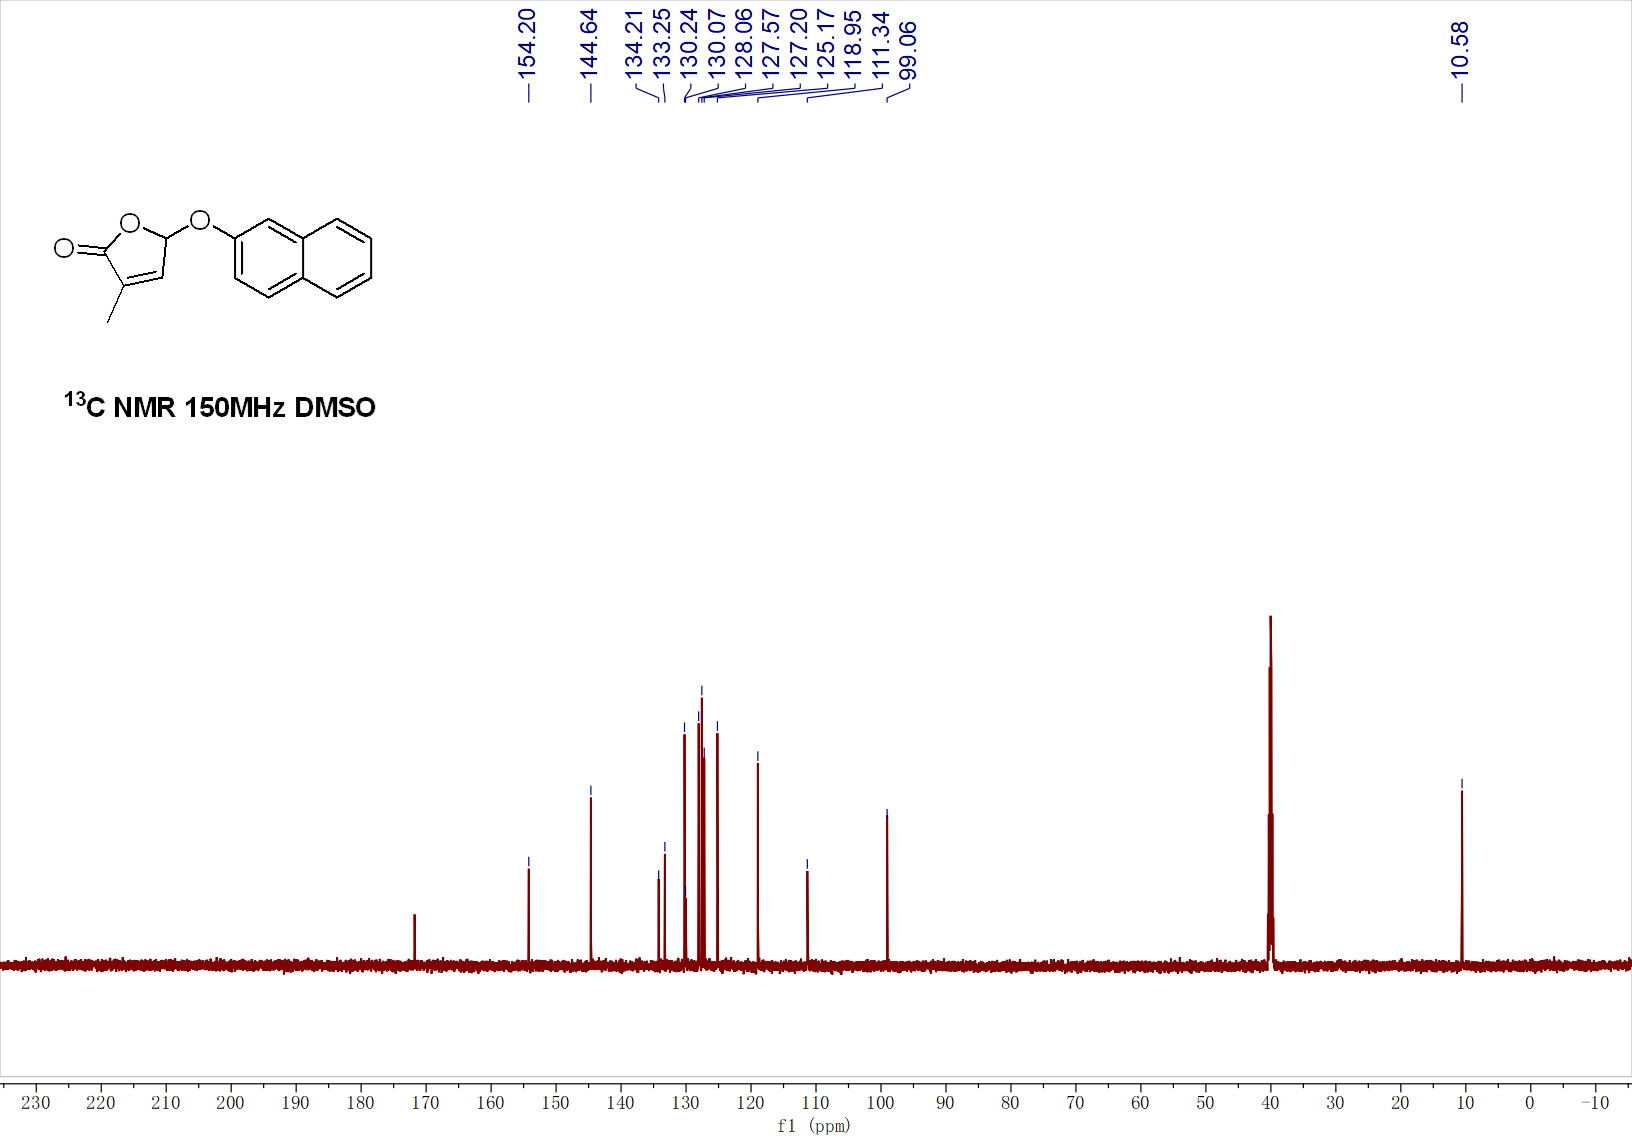


**1H NMR of 3p**


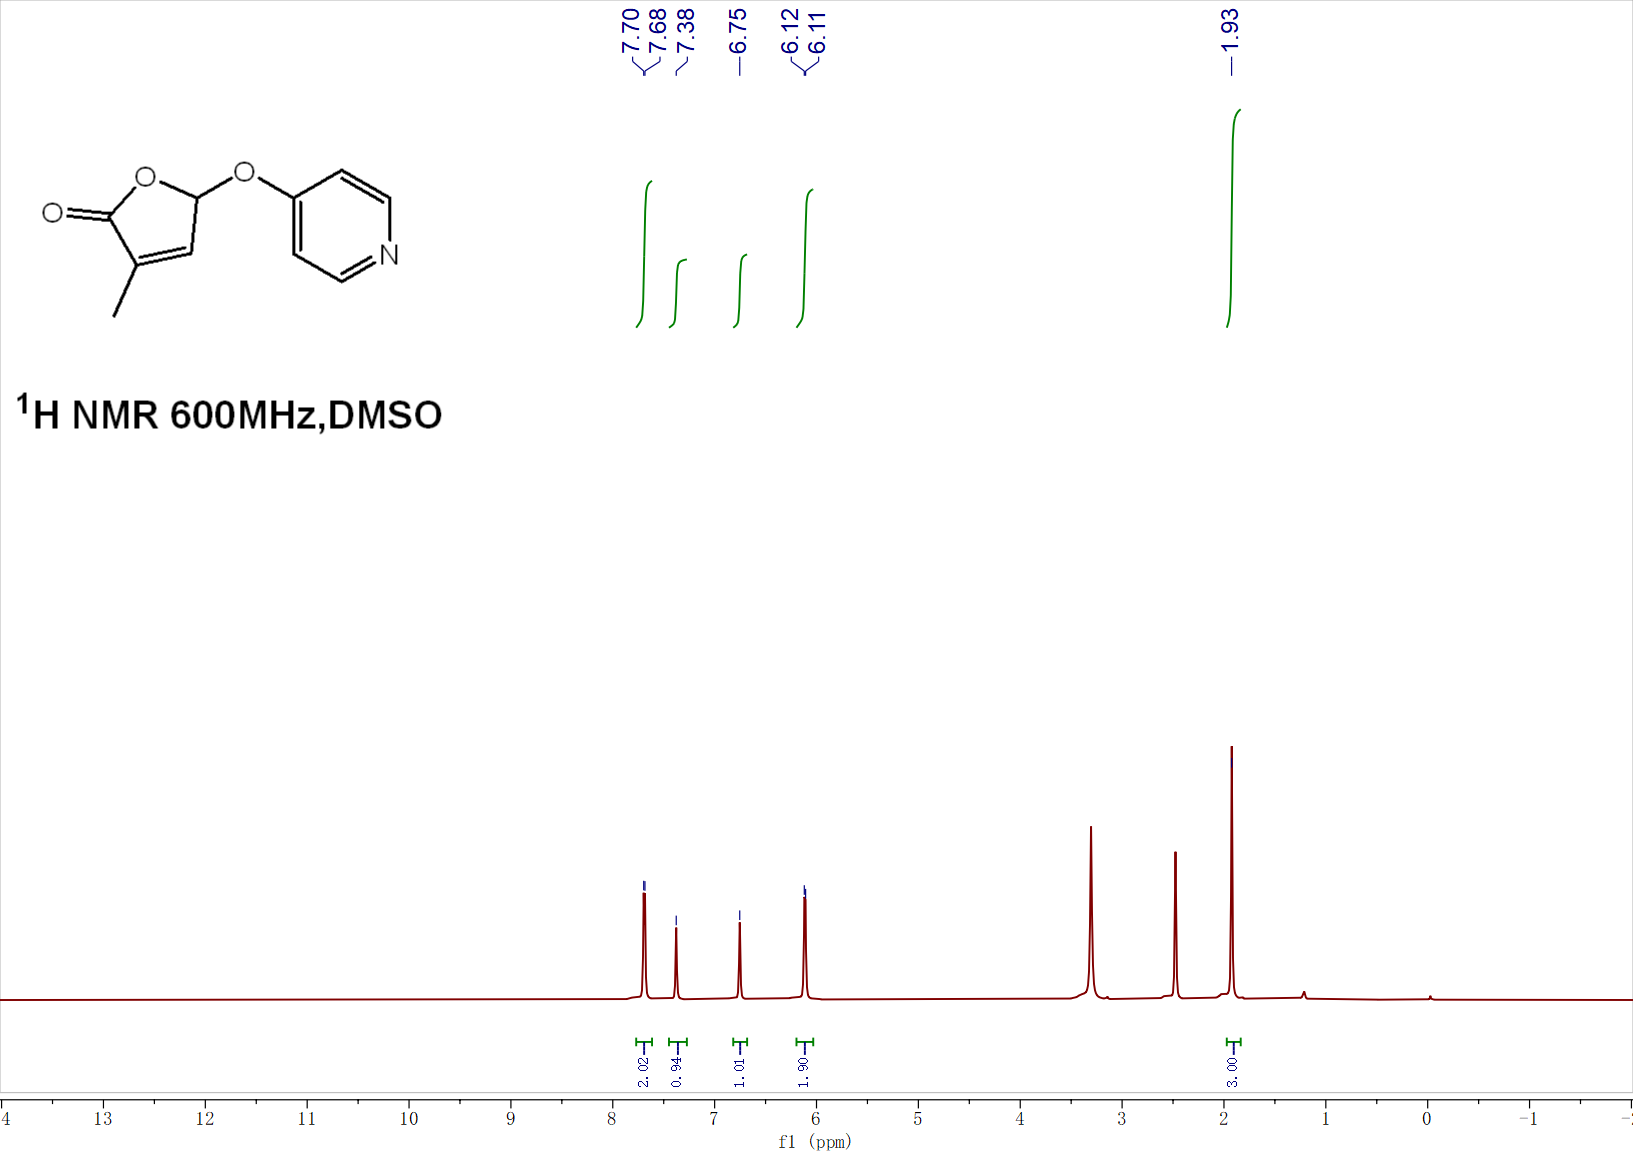


**13C NMR of 3p**


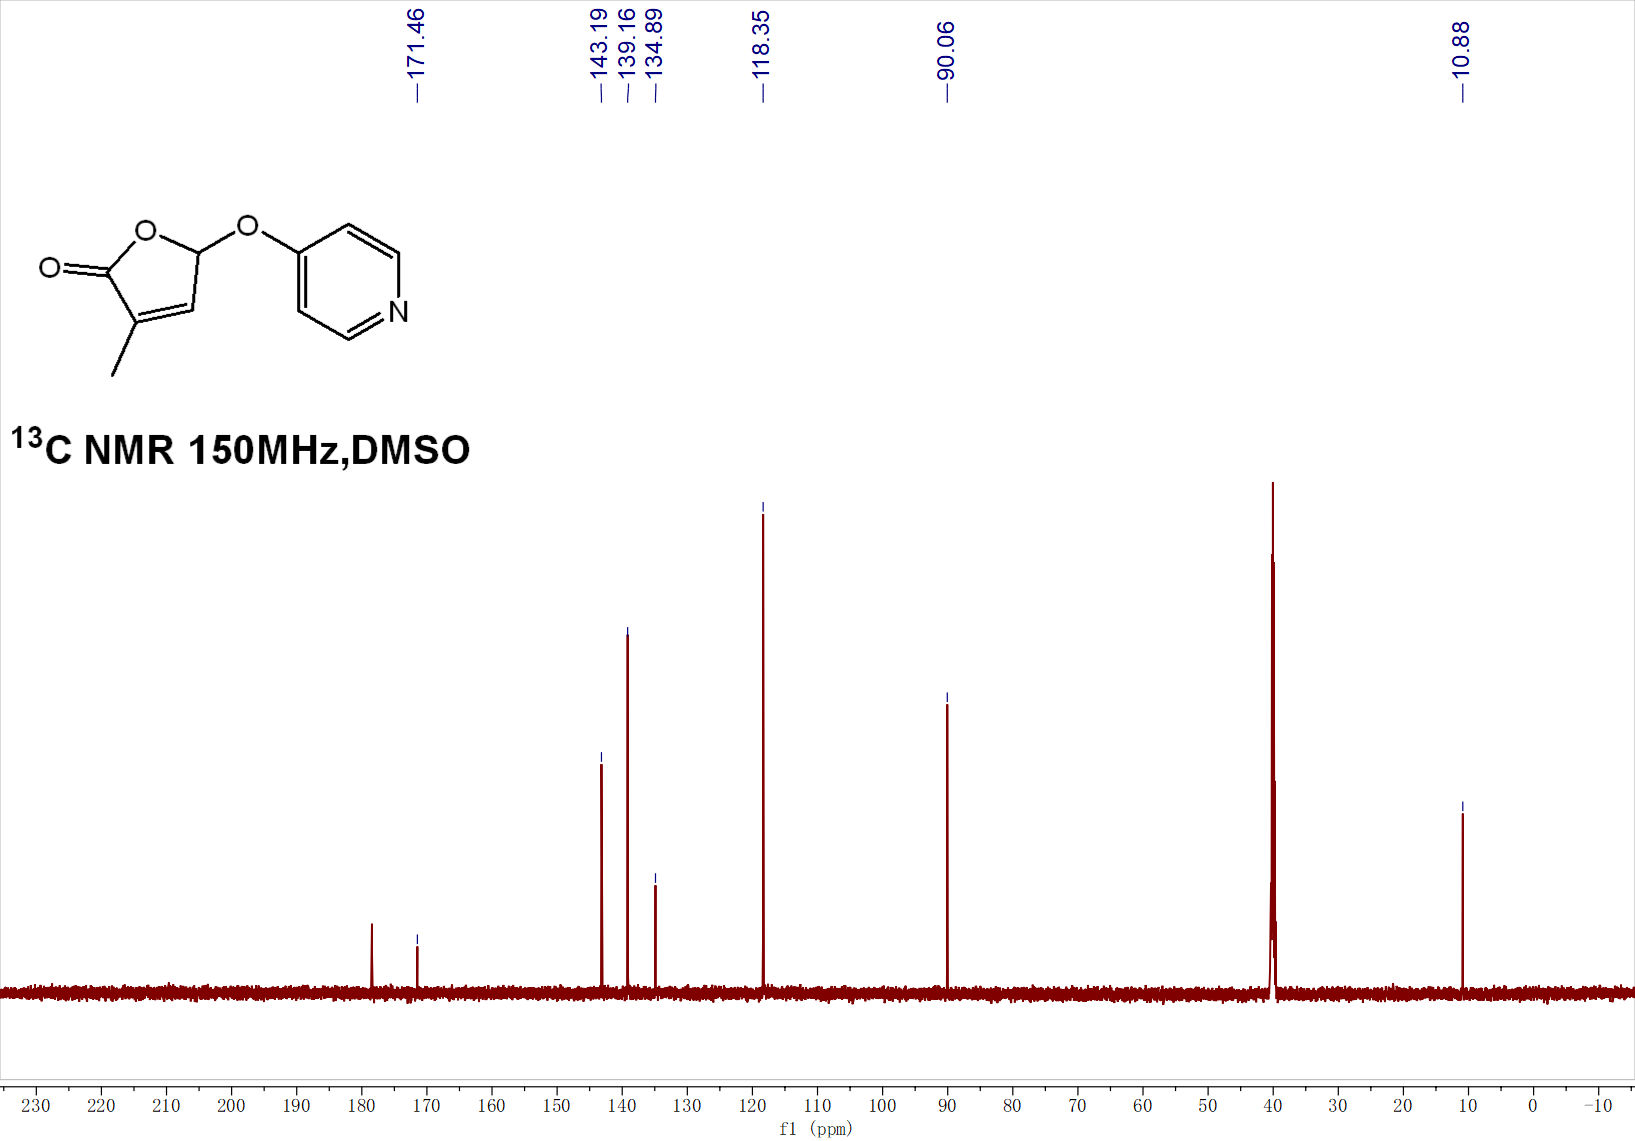


**1H NMR of 3q**


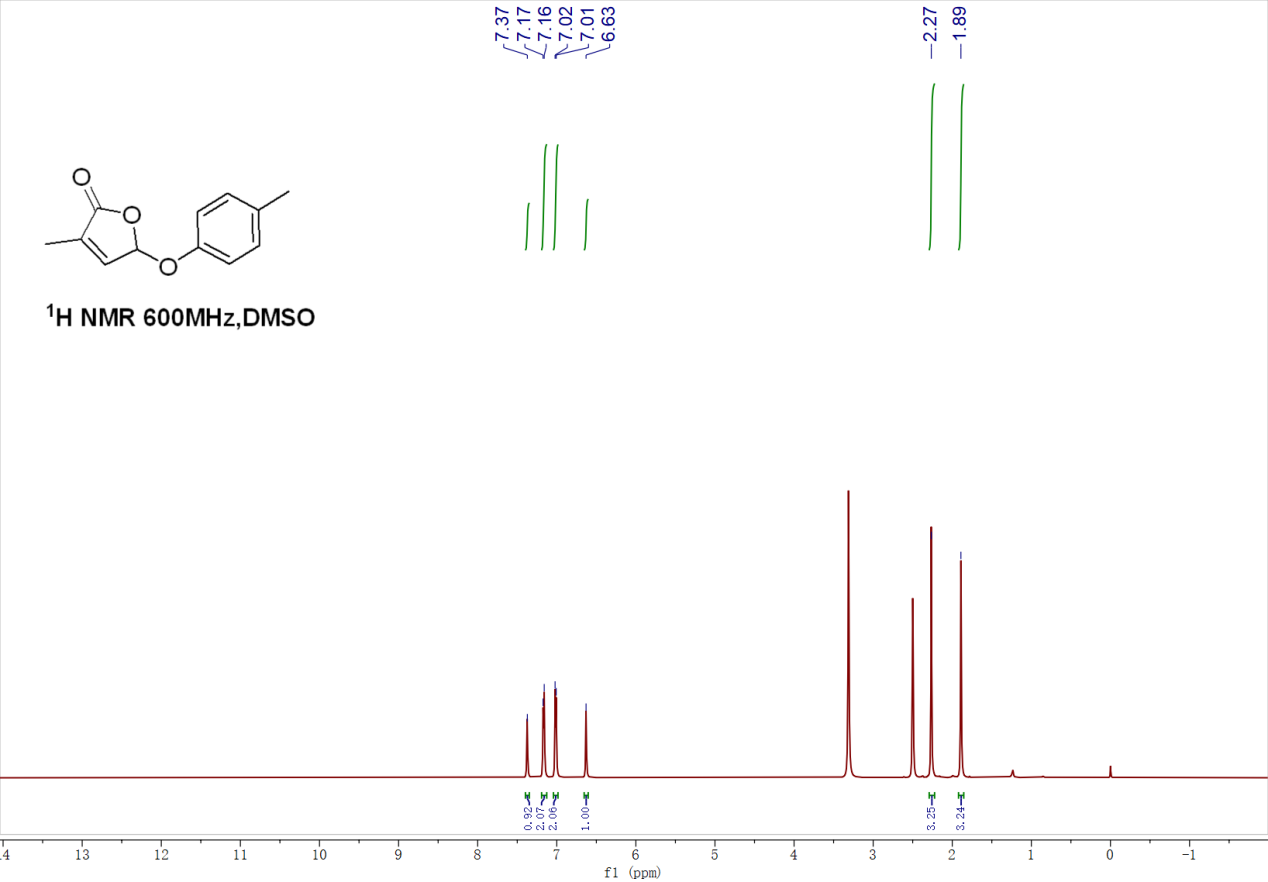


**13C NMR of 3q**


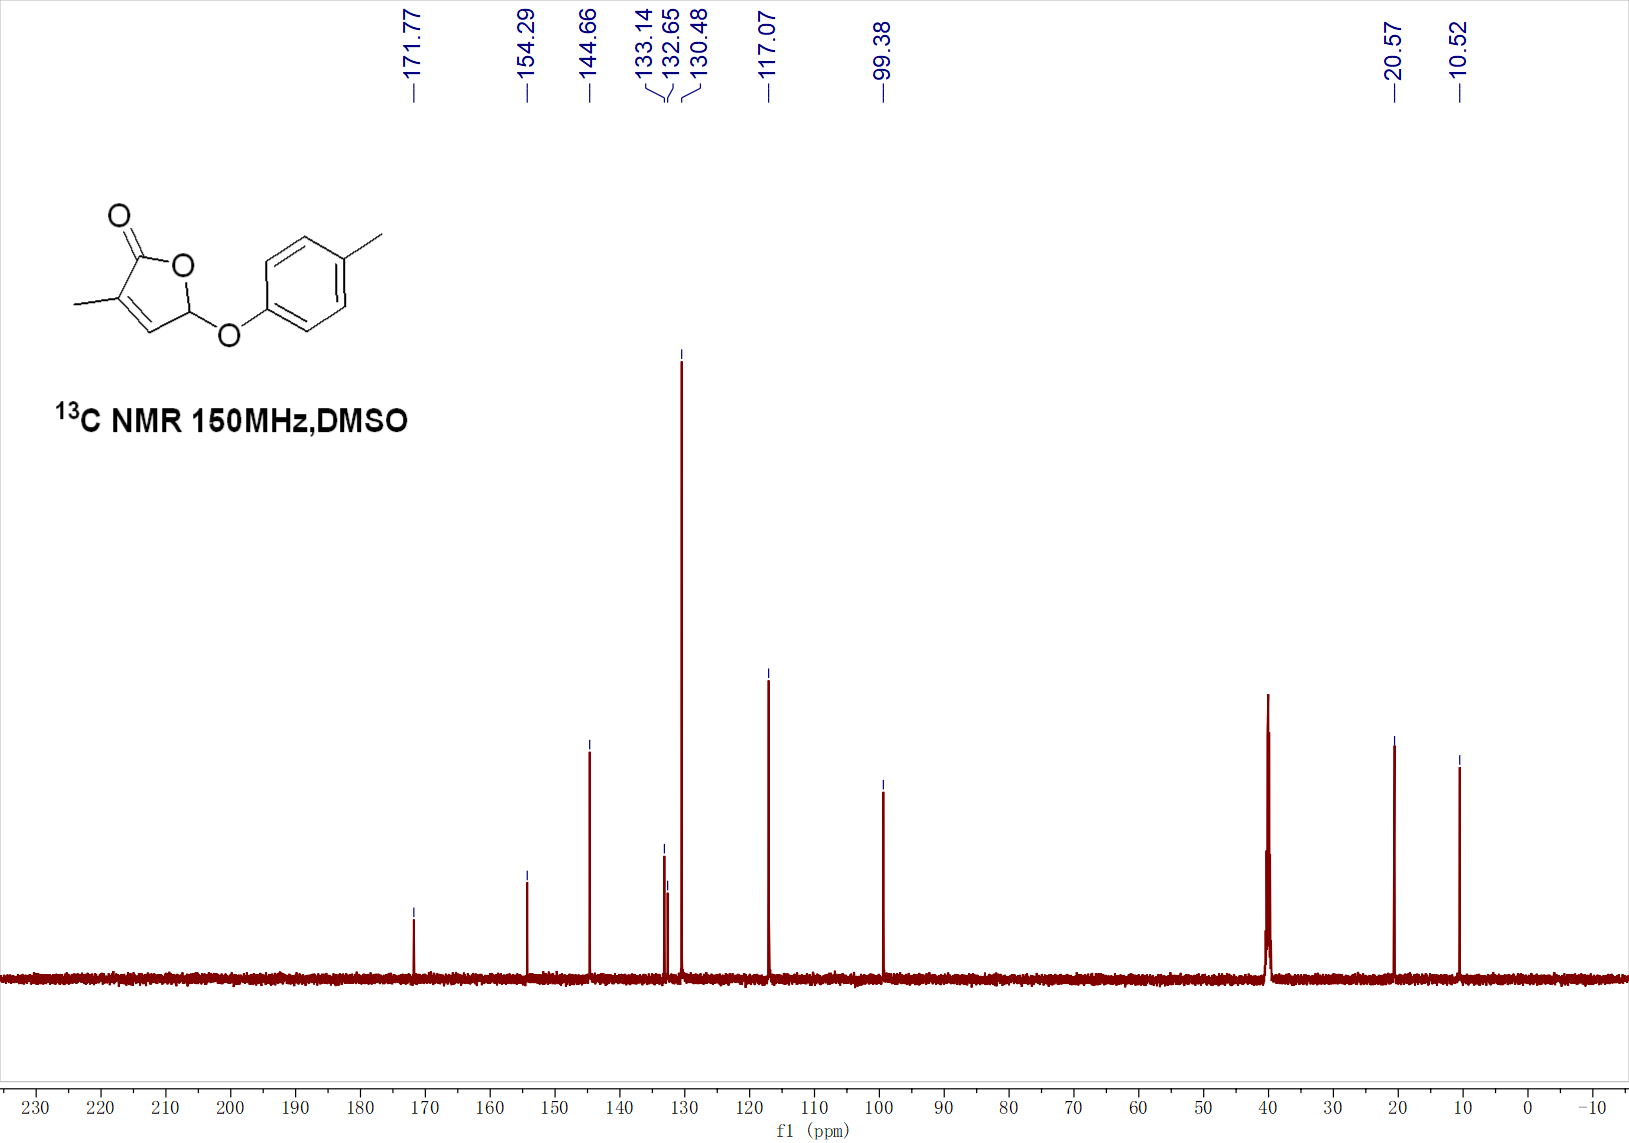


**1H NMR of 3r**


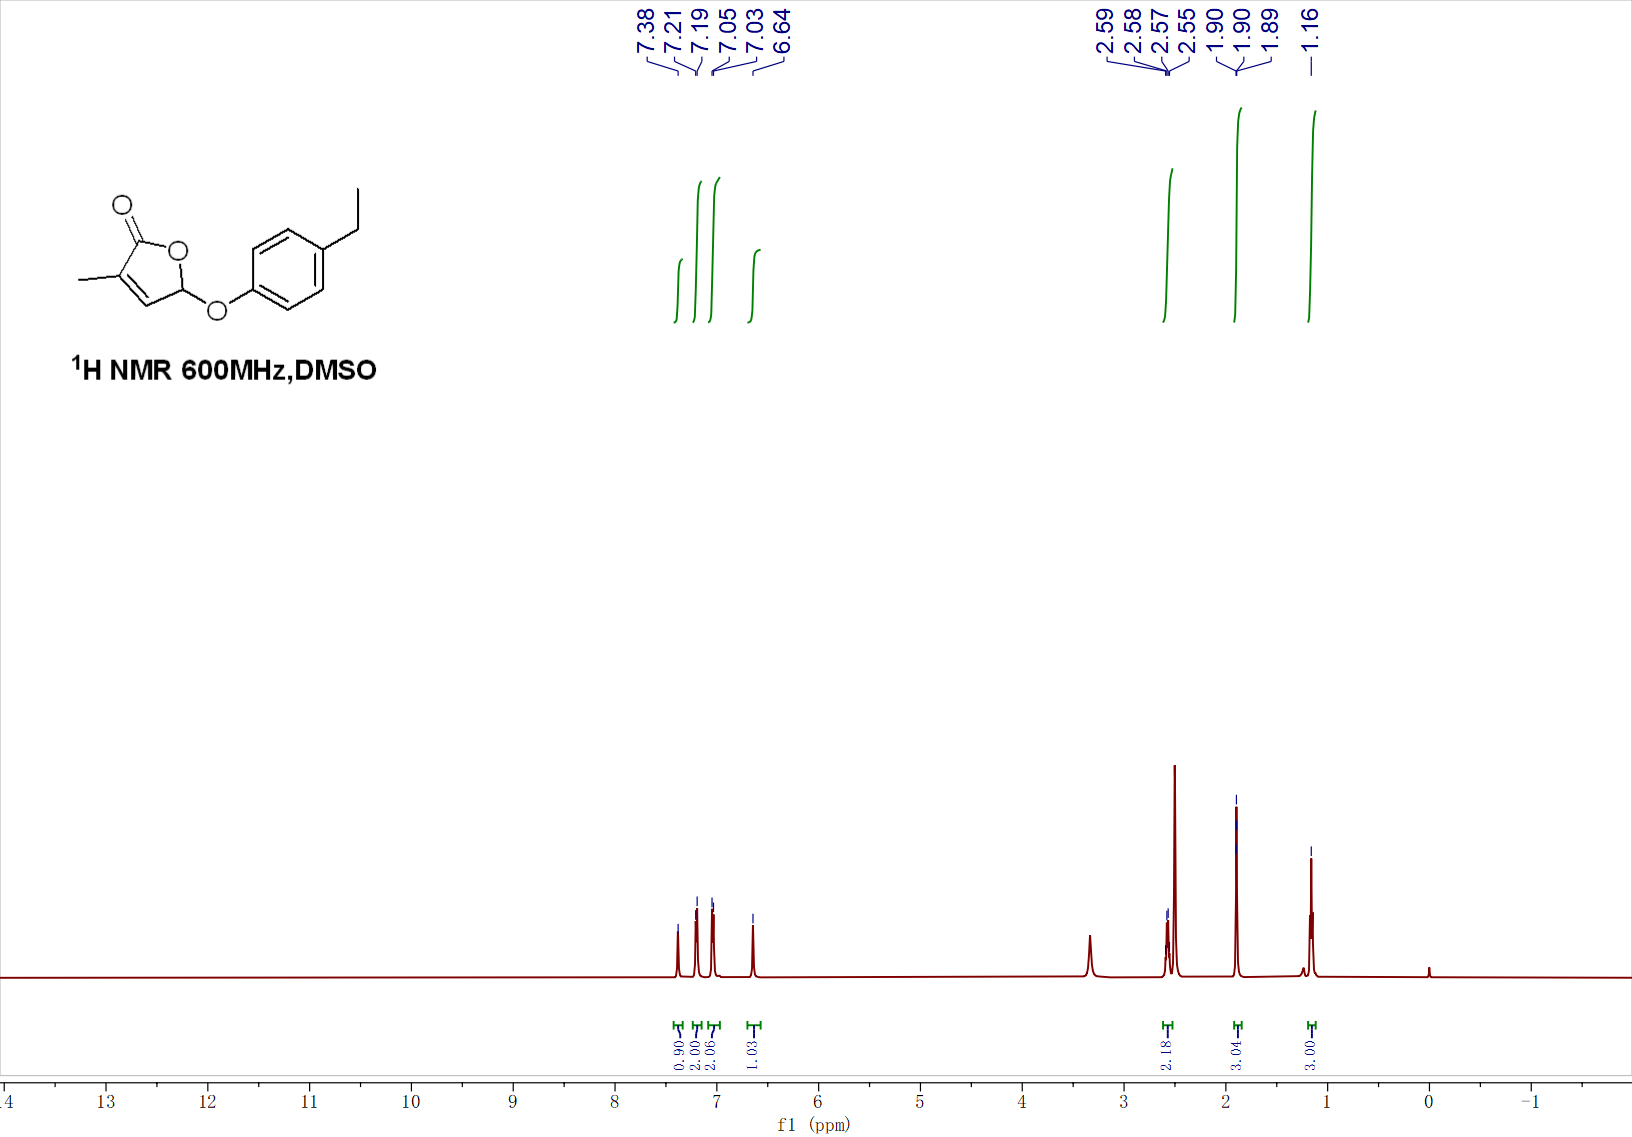


**13C NMR of 3r**


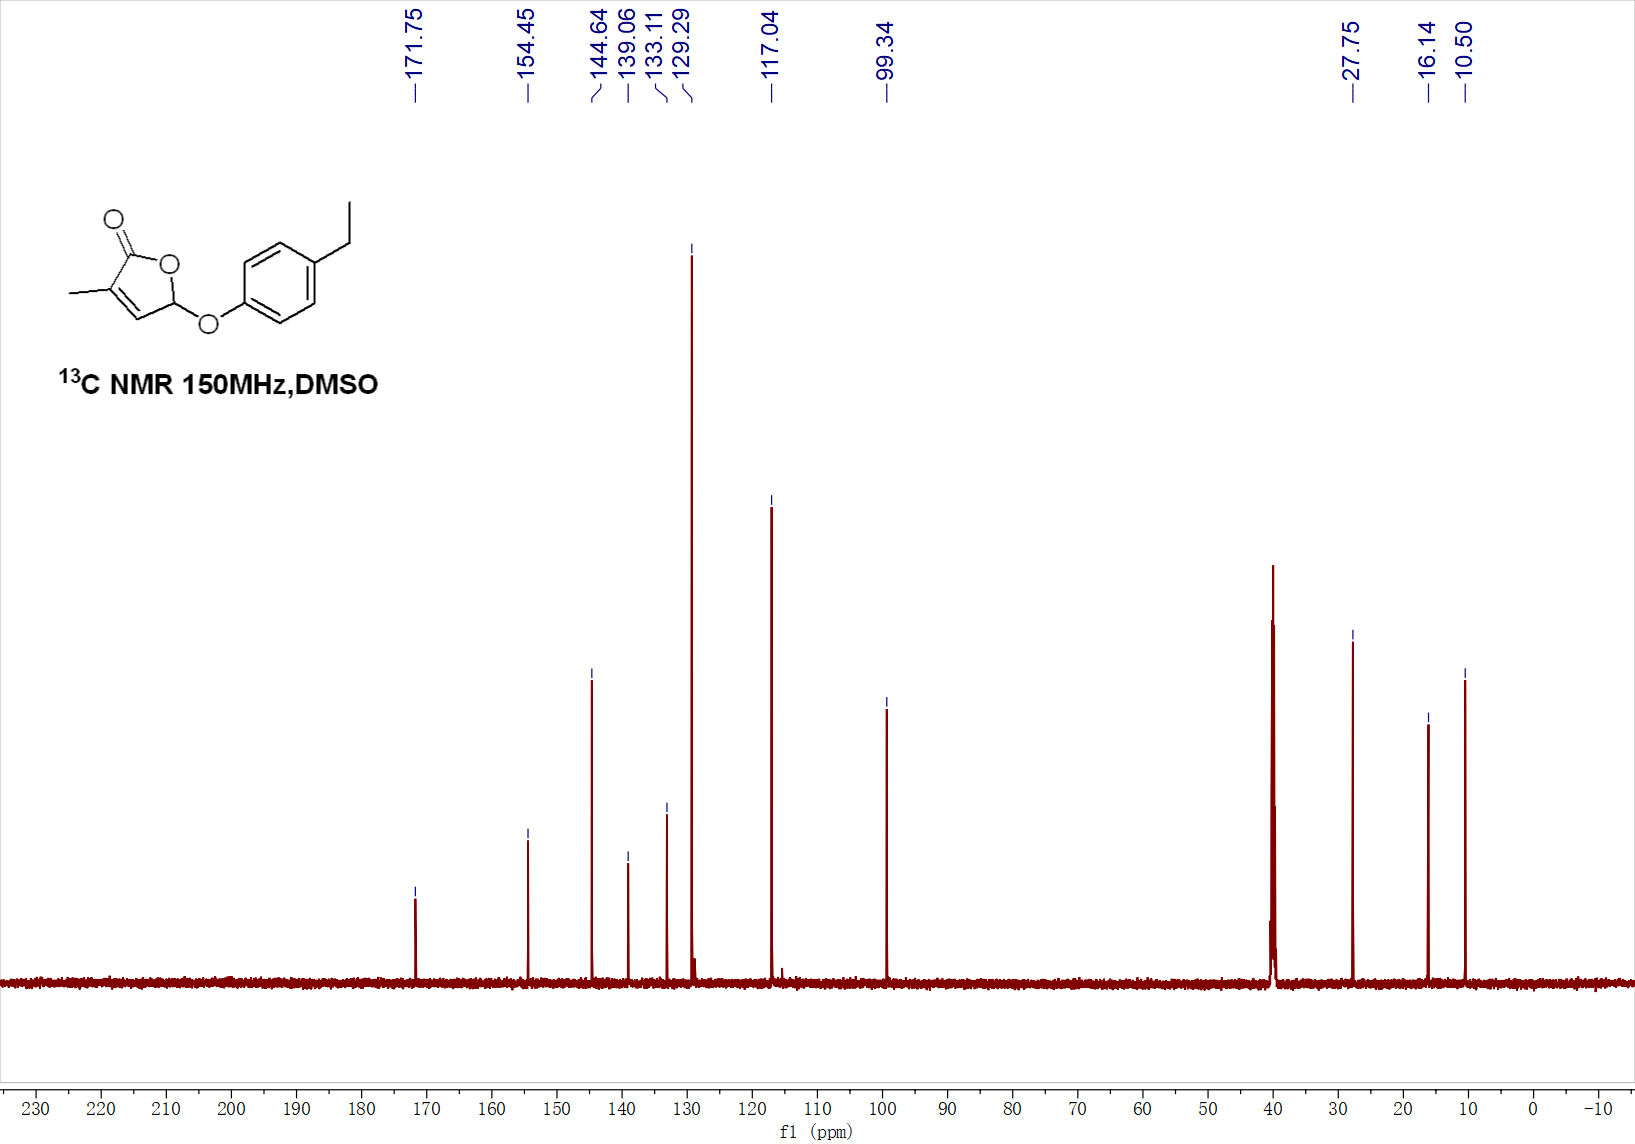


**1H NMR of 3s**


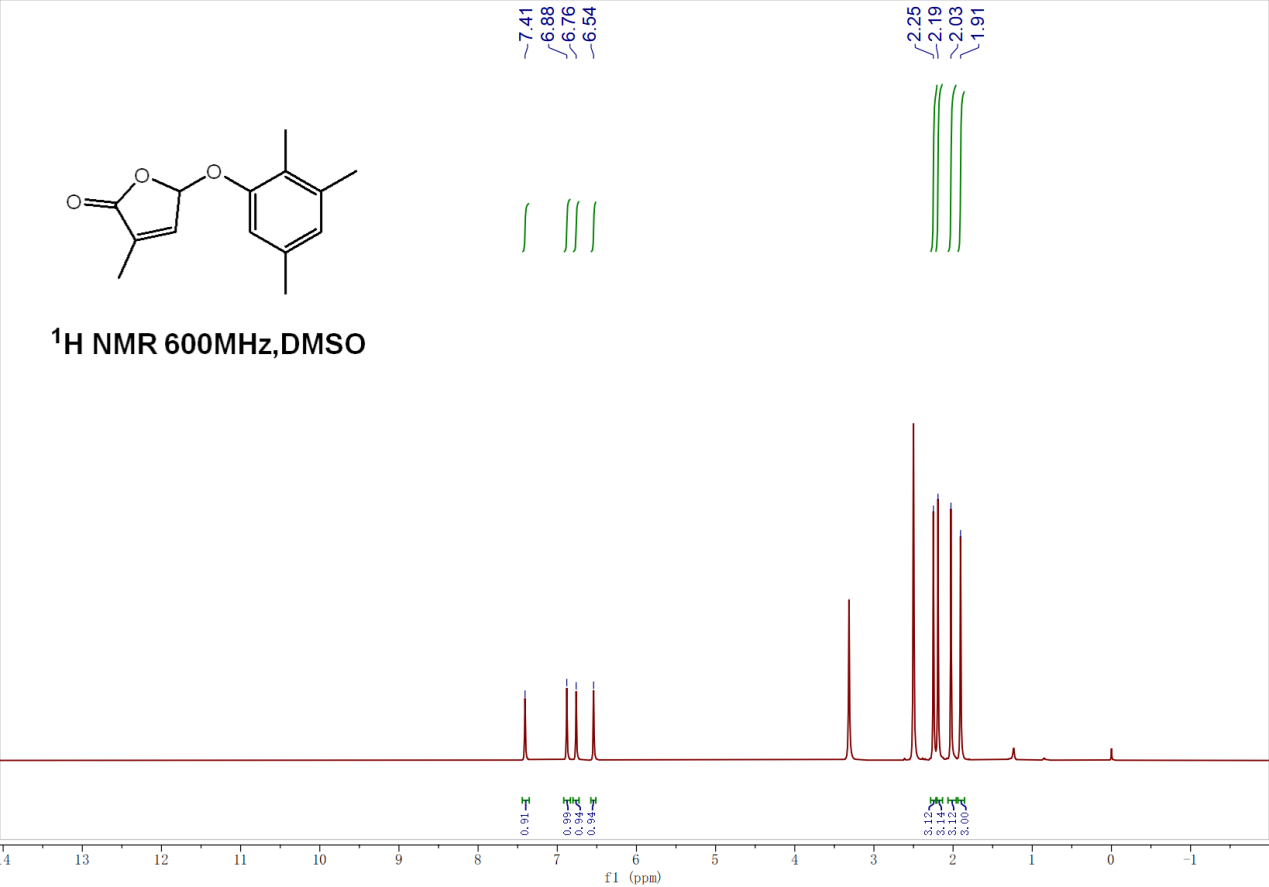


**13C NMR of 3s**


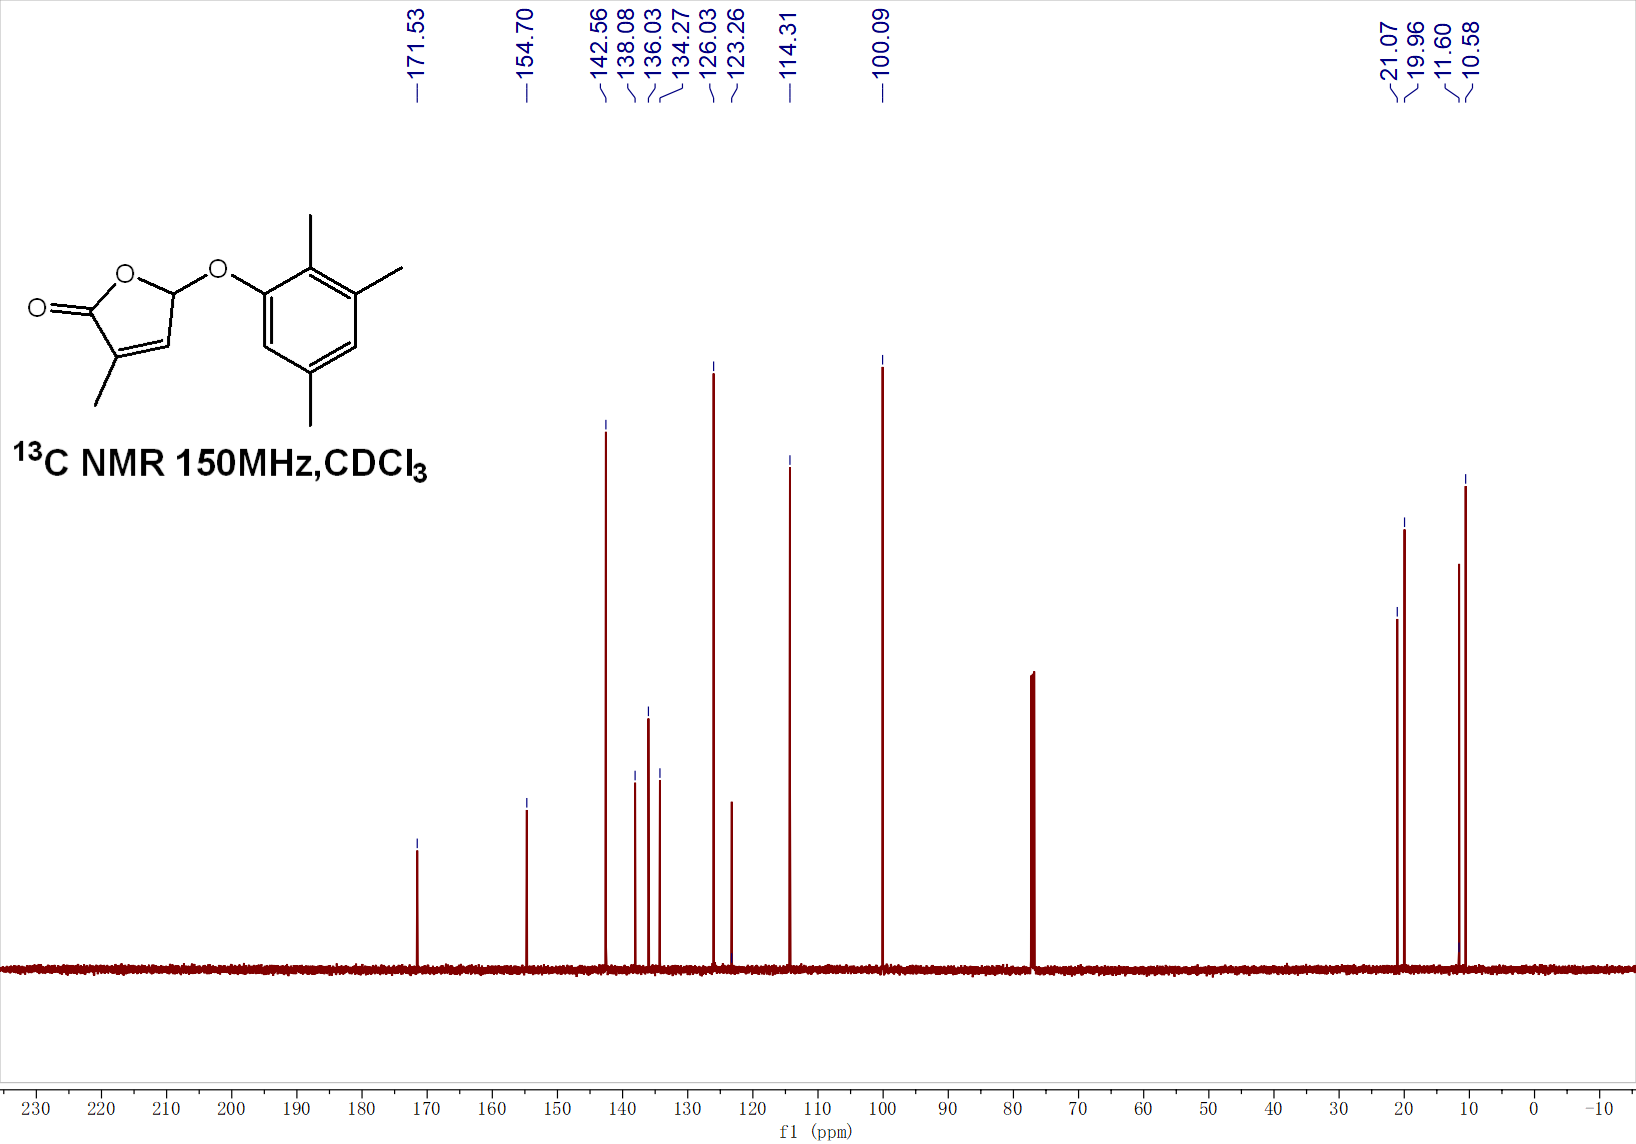


**1H NMR of 3t**


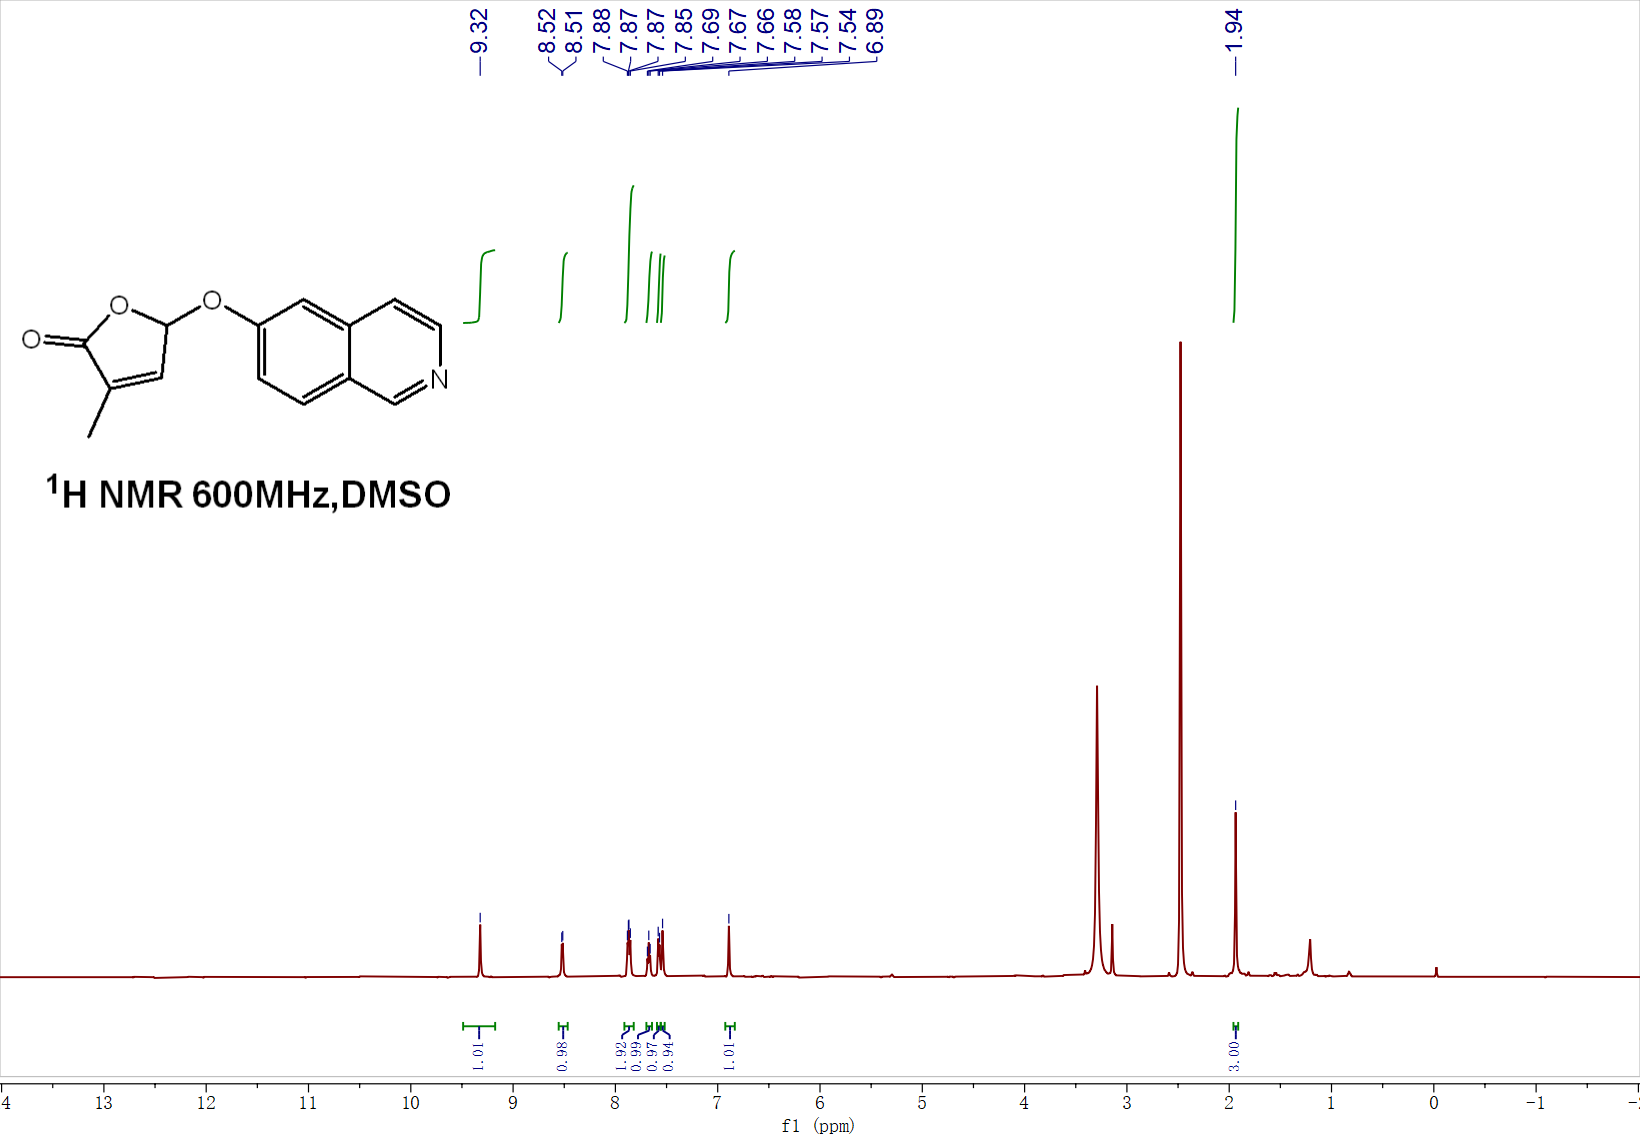


**13C NMR of 3t**


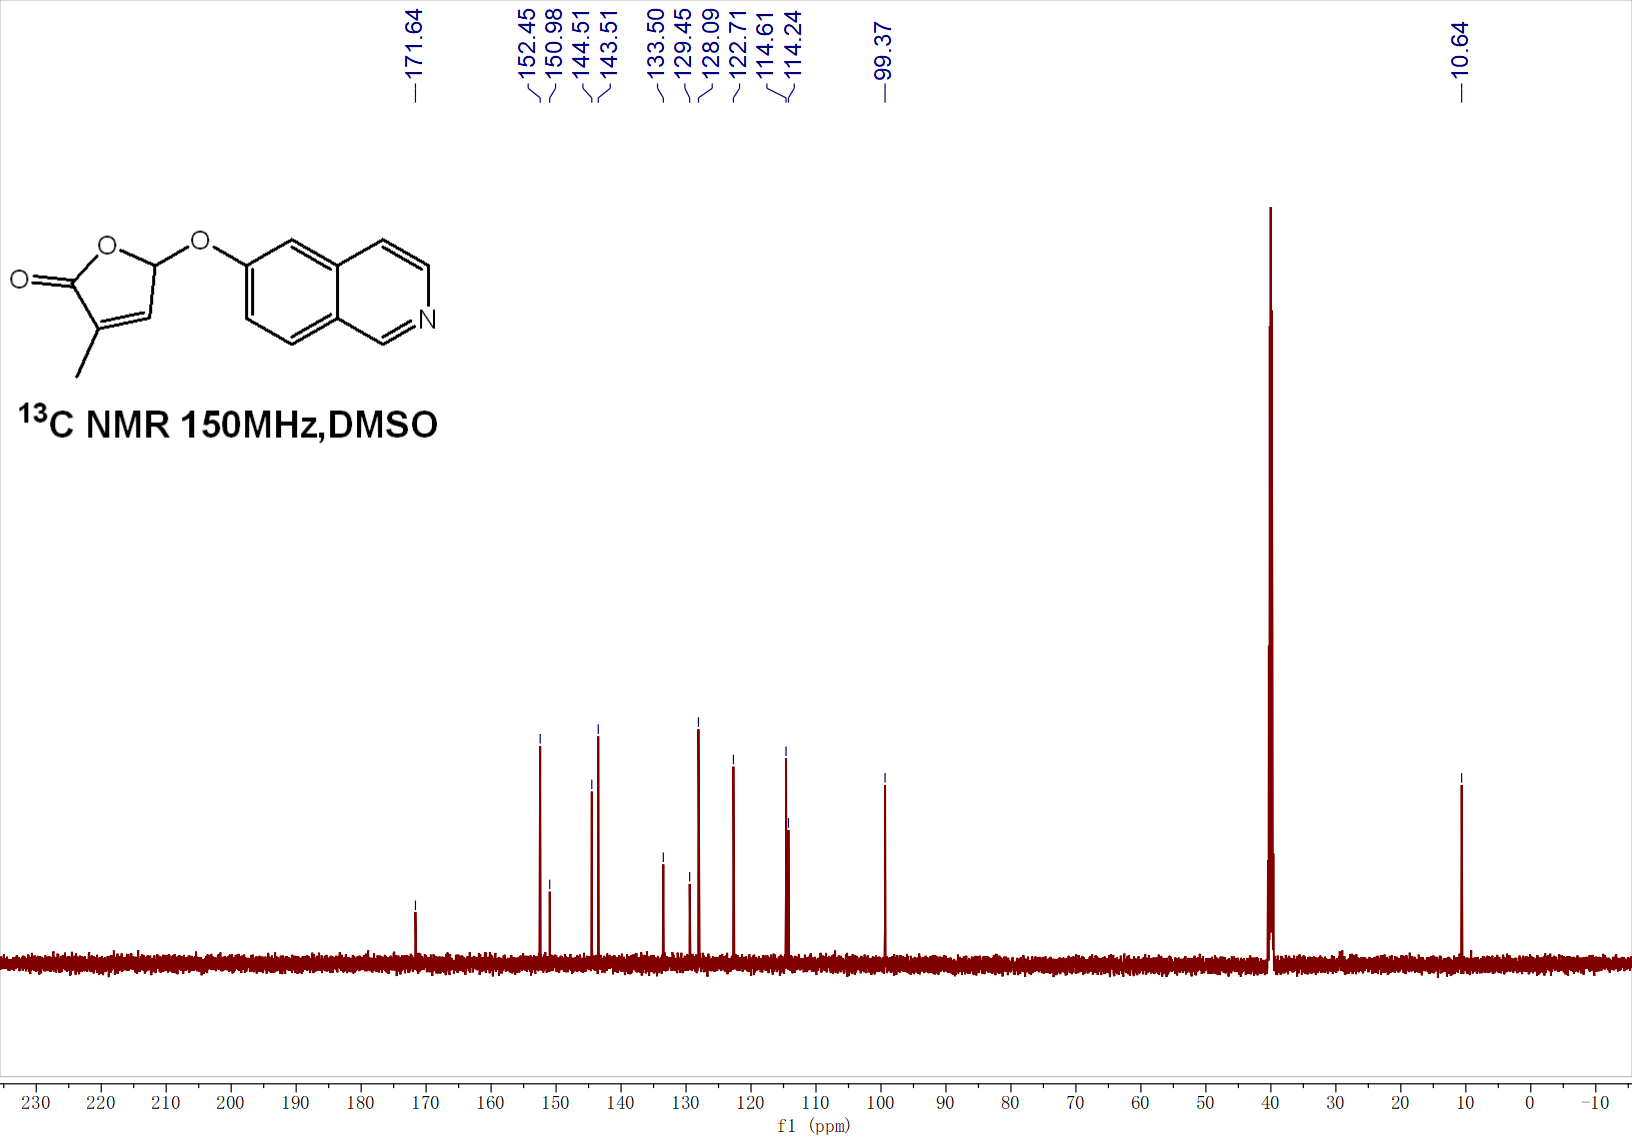


**1H NMR of 3u**


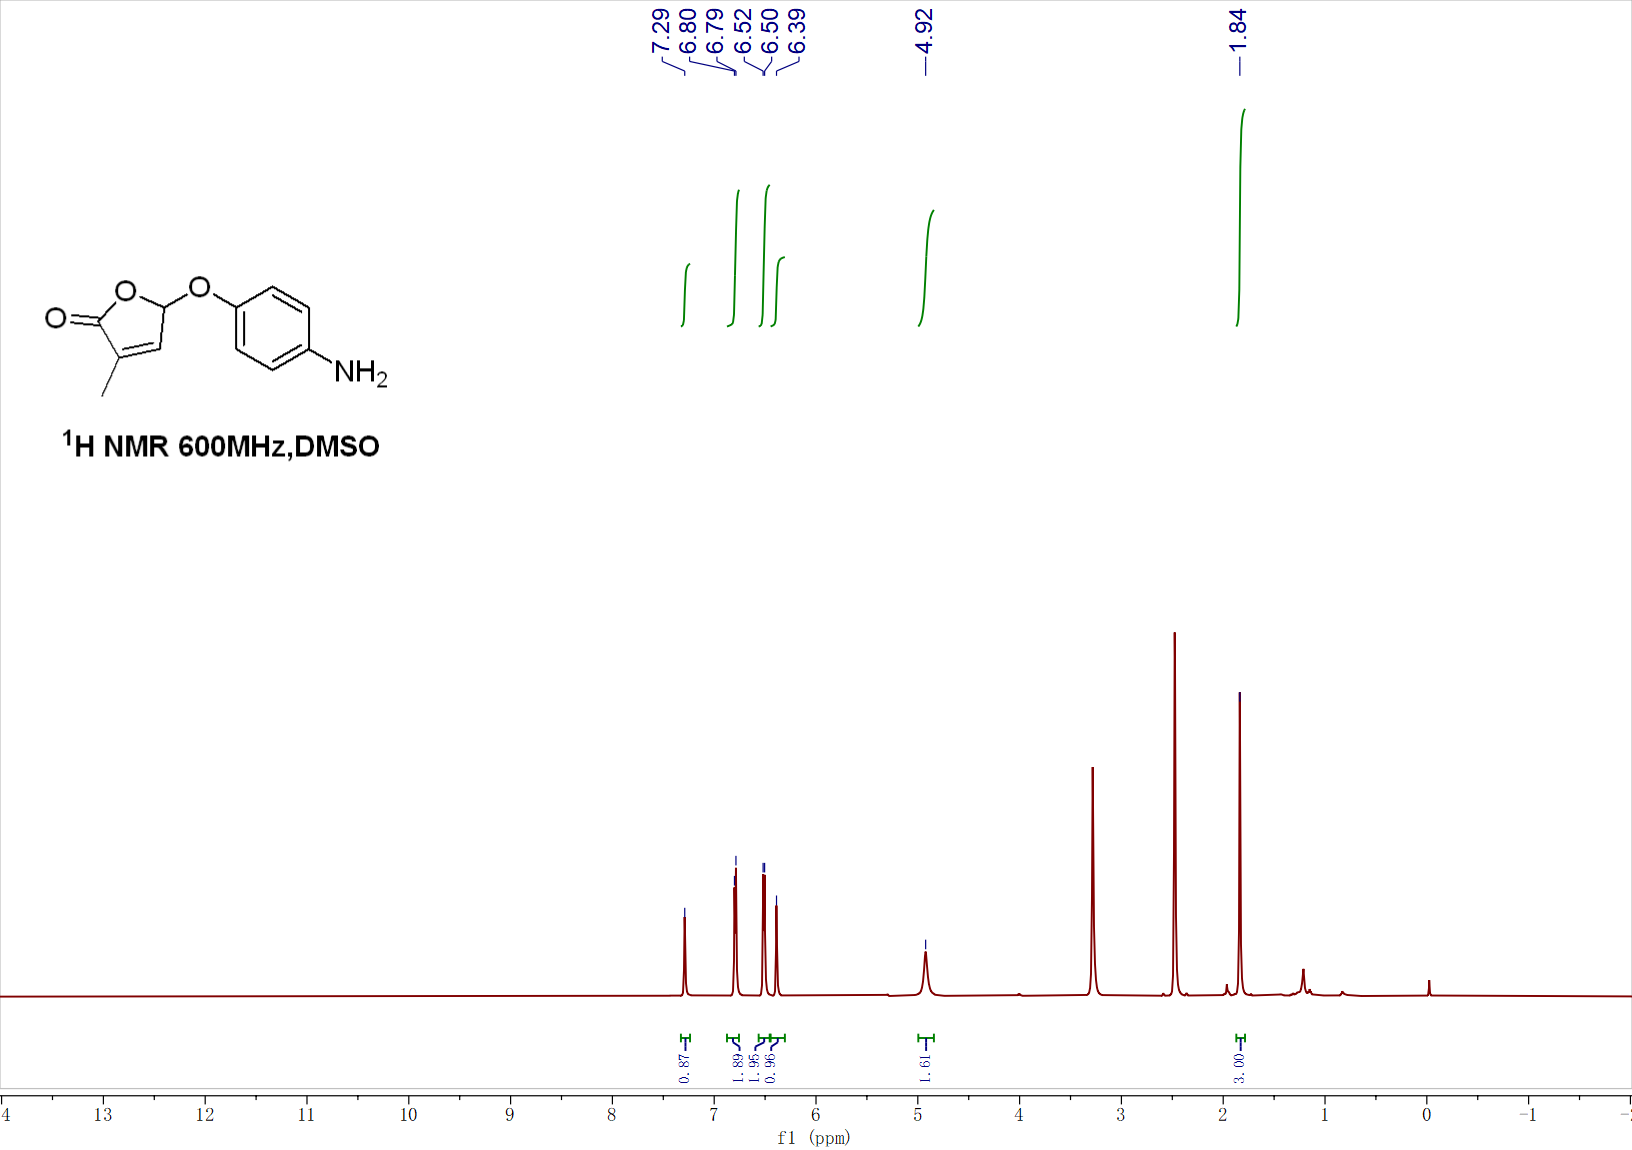


**13C NMR of 3u**


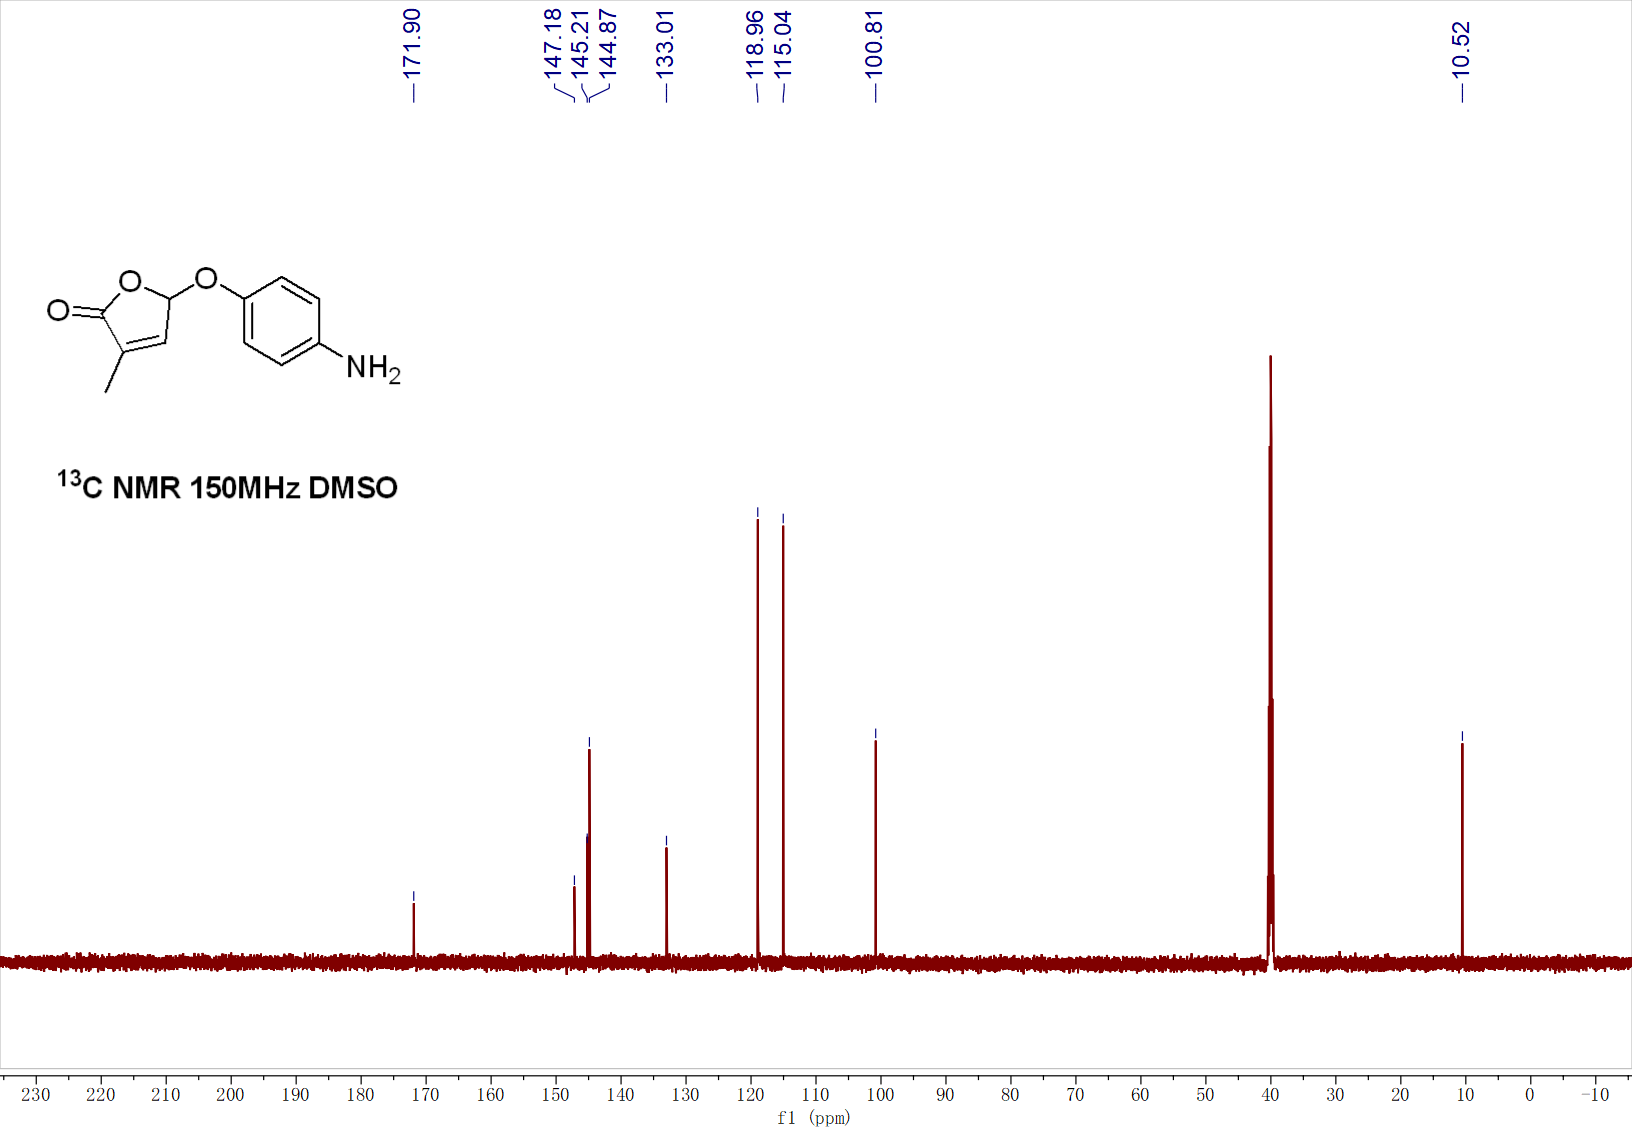


**1H NMR of 3v**


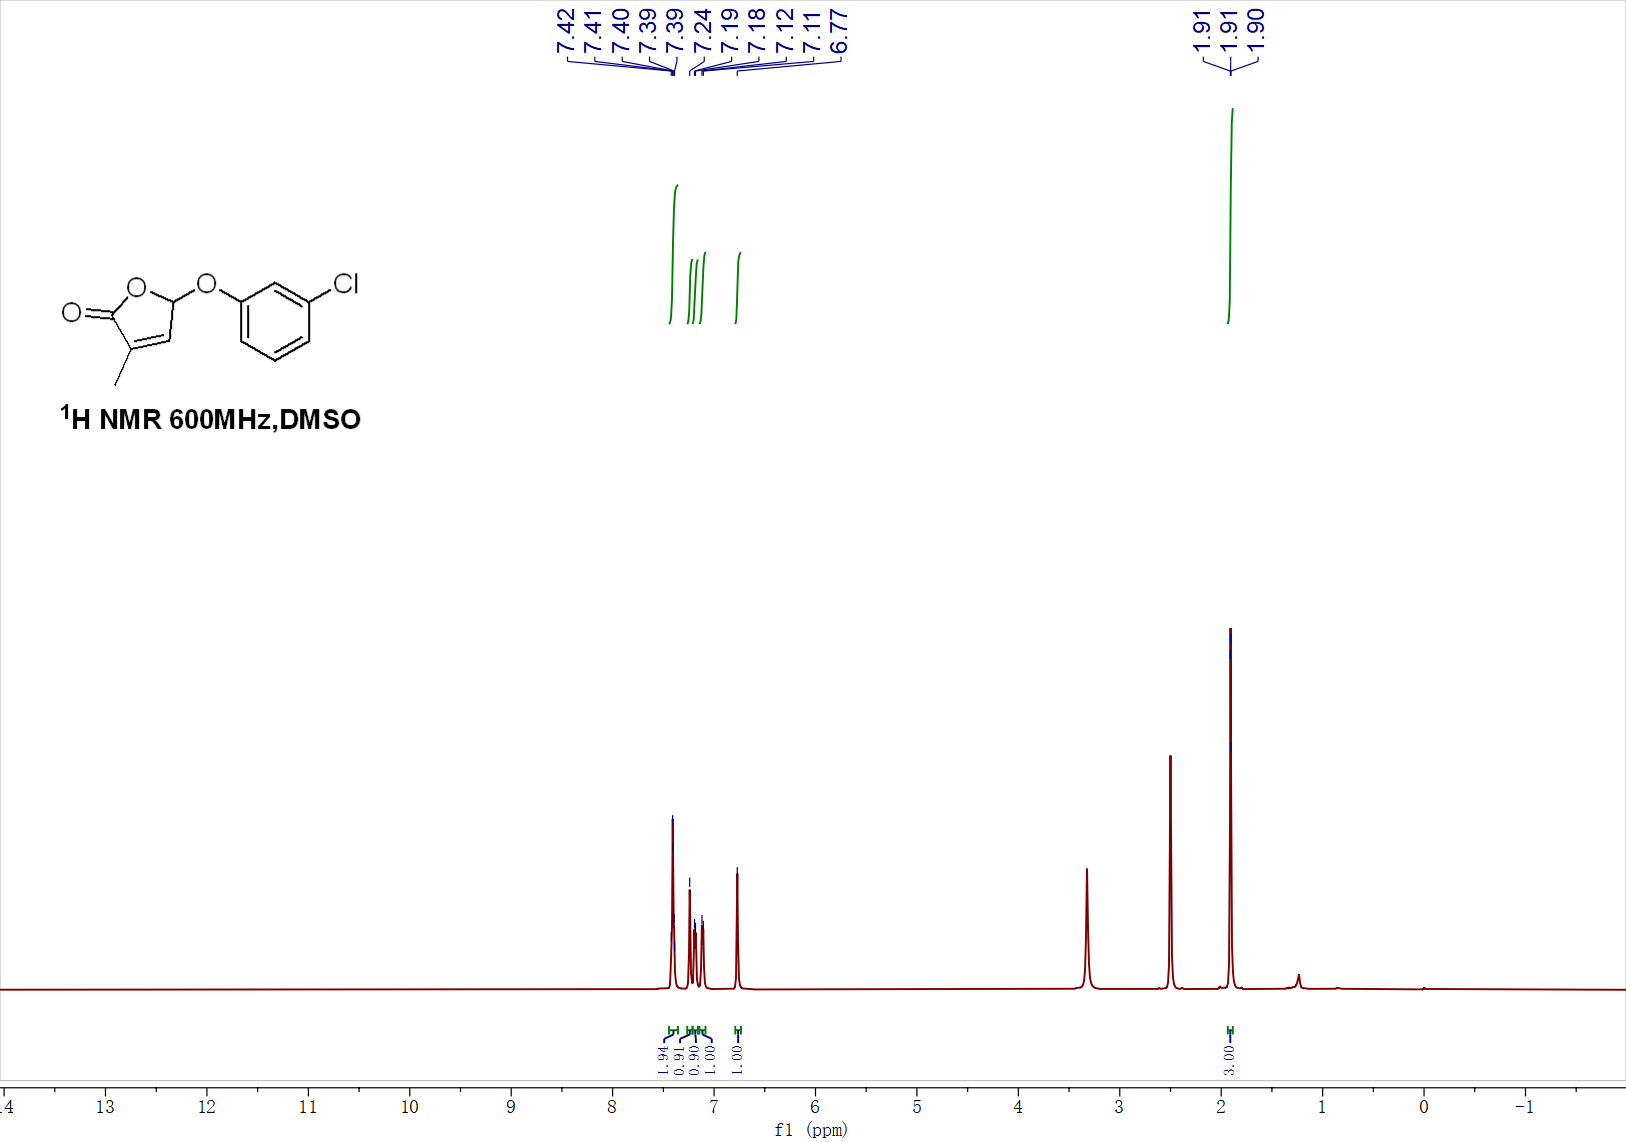


**13C NMR of 3v**


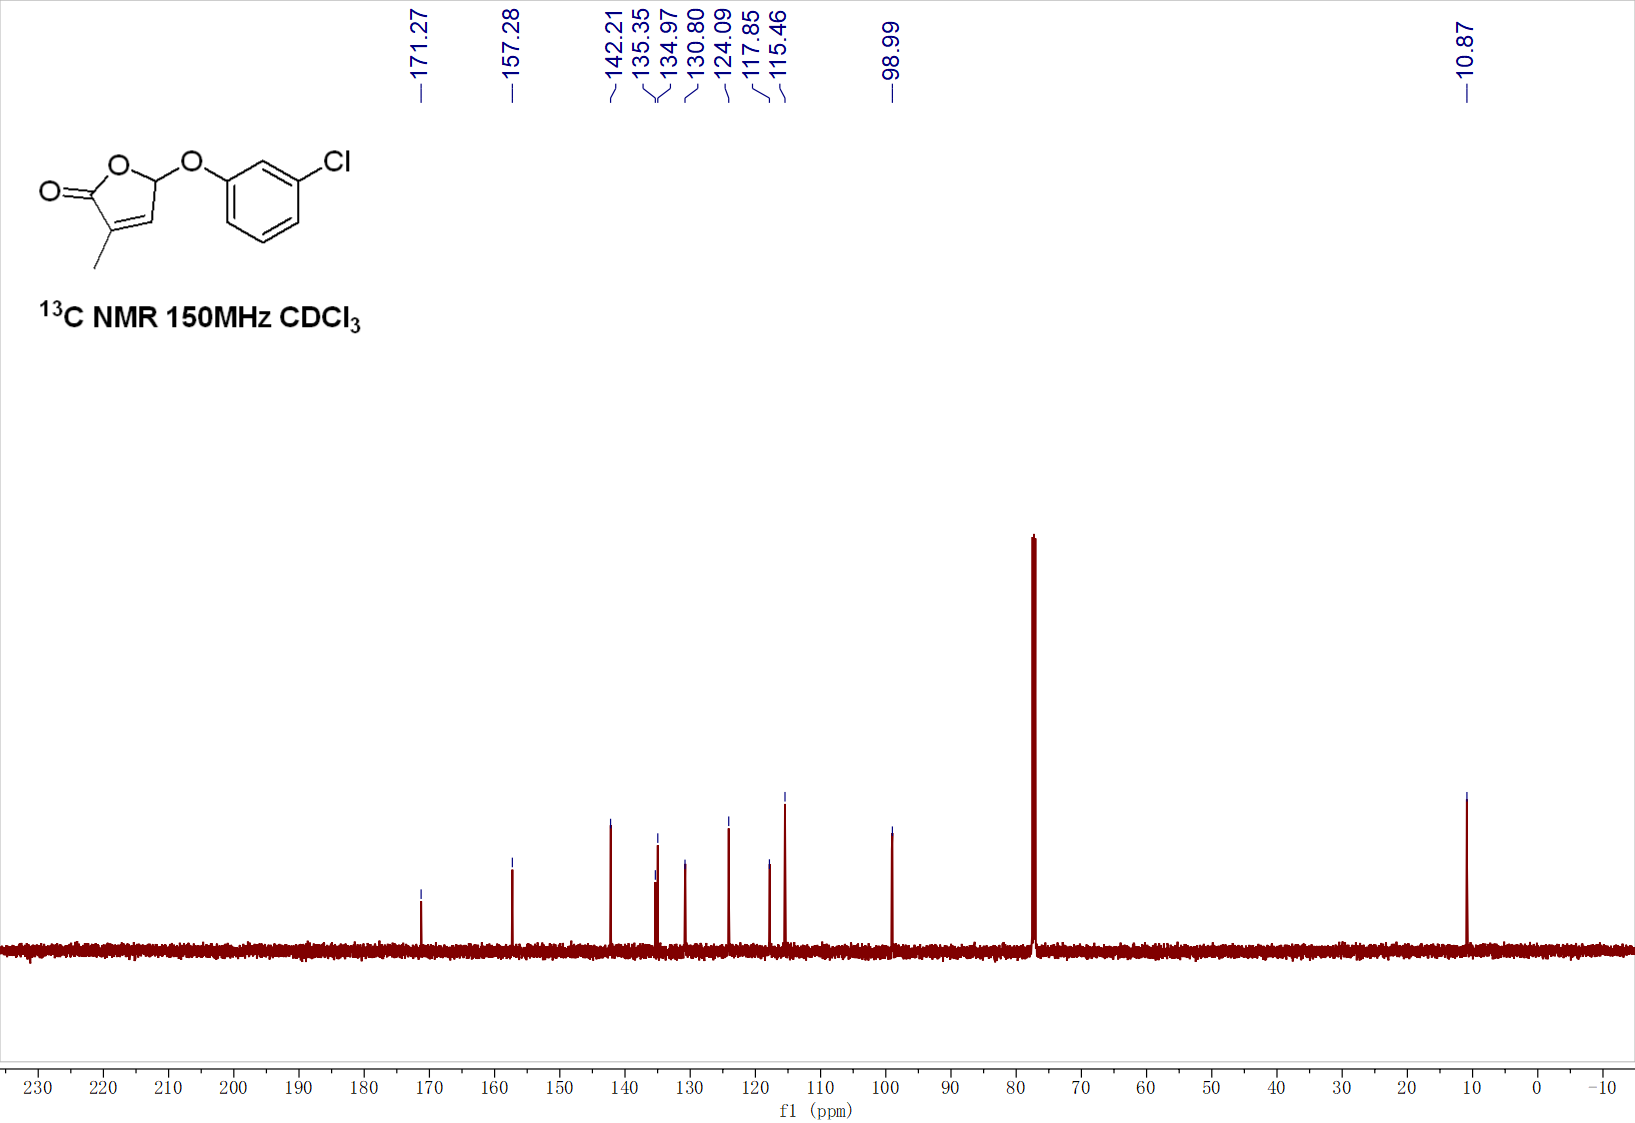


**1H NMR of 3w**


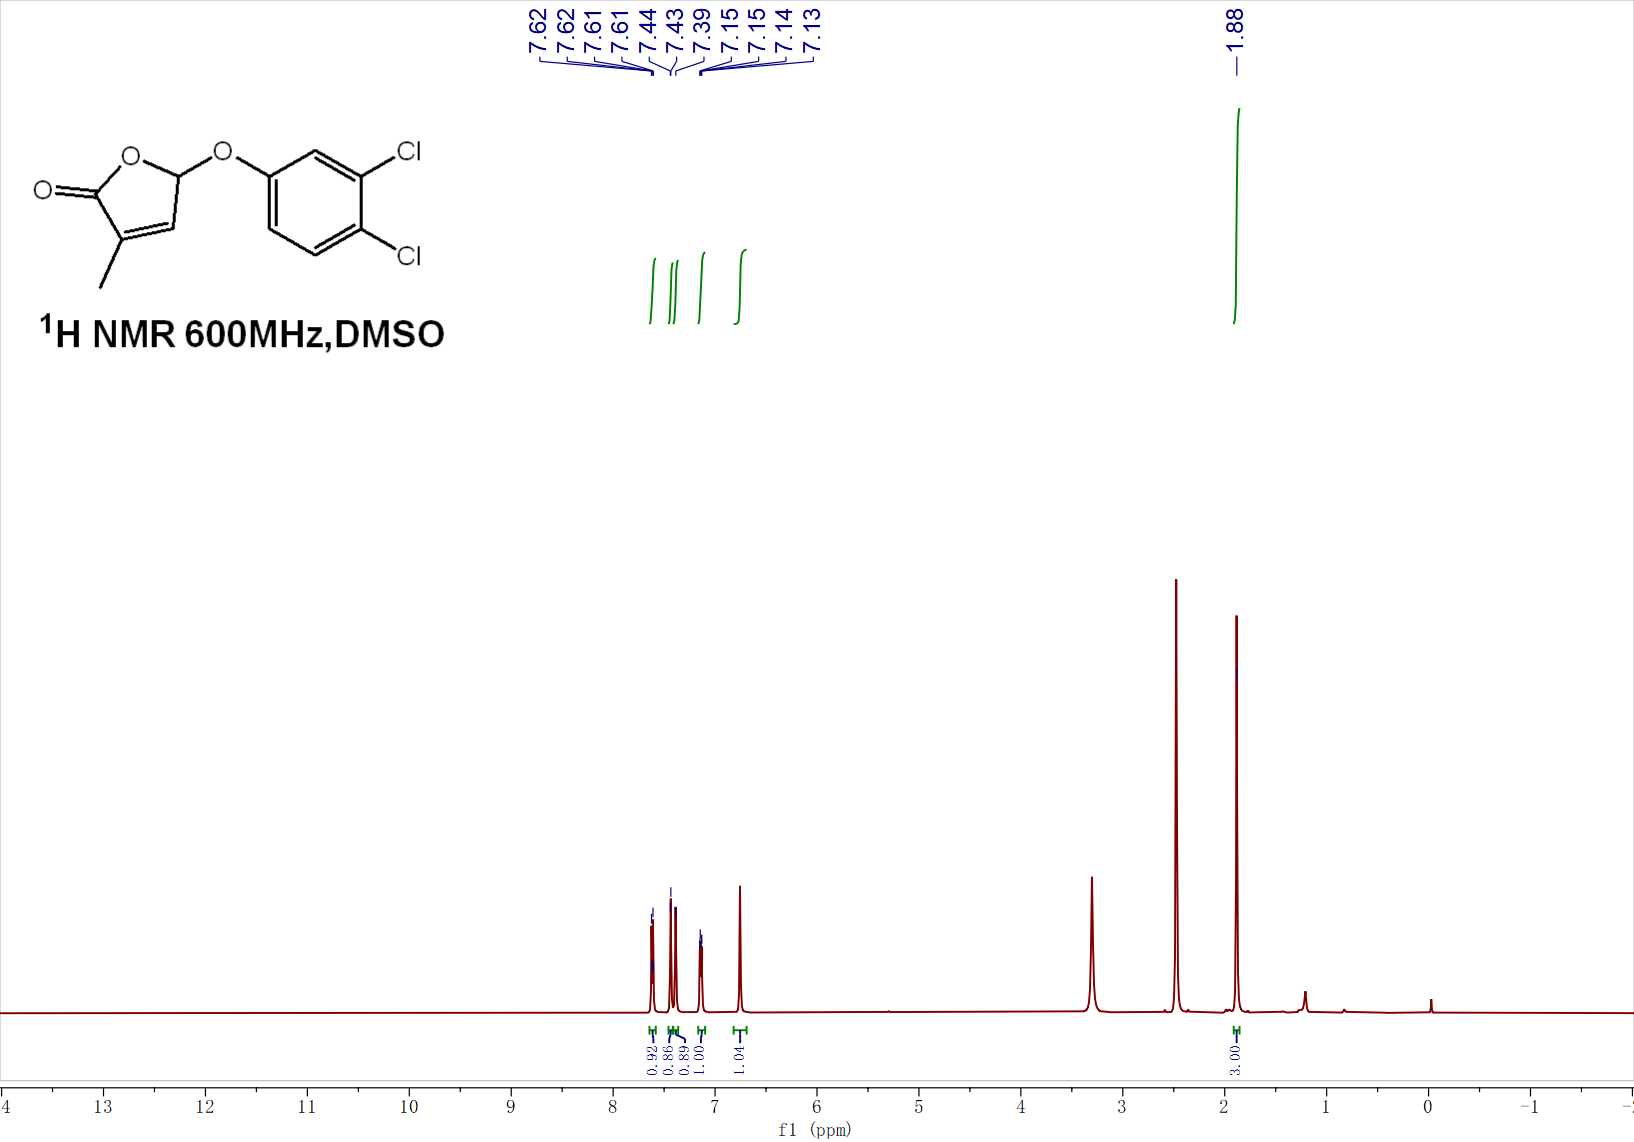


**13C NMR of 3w**


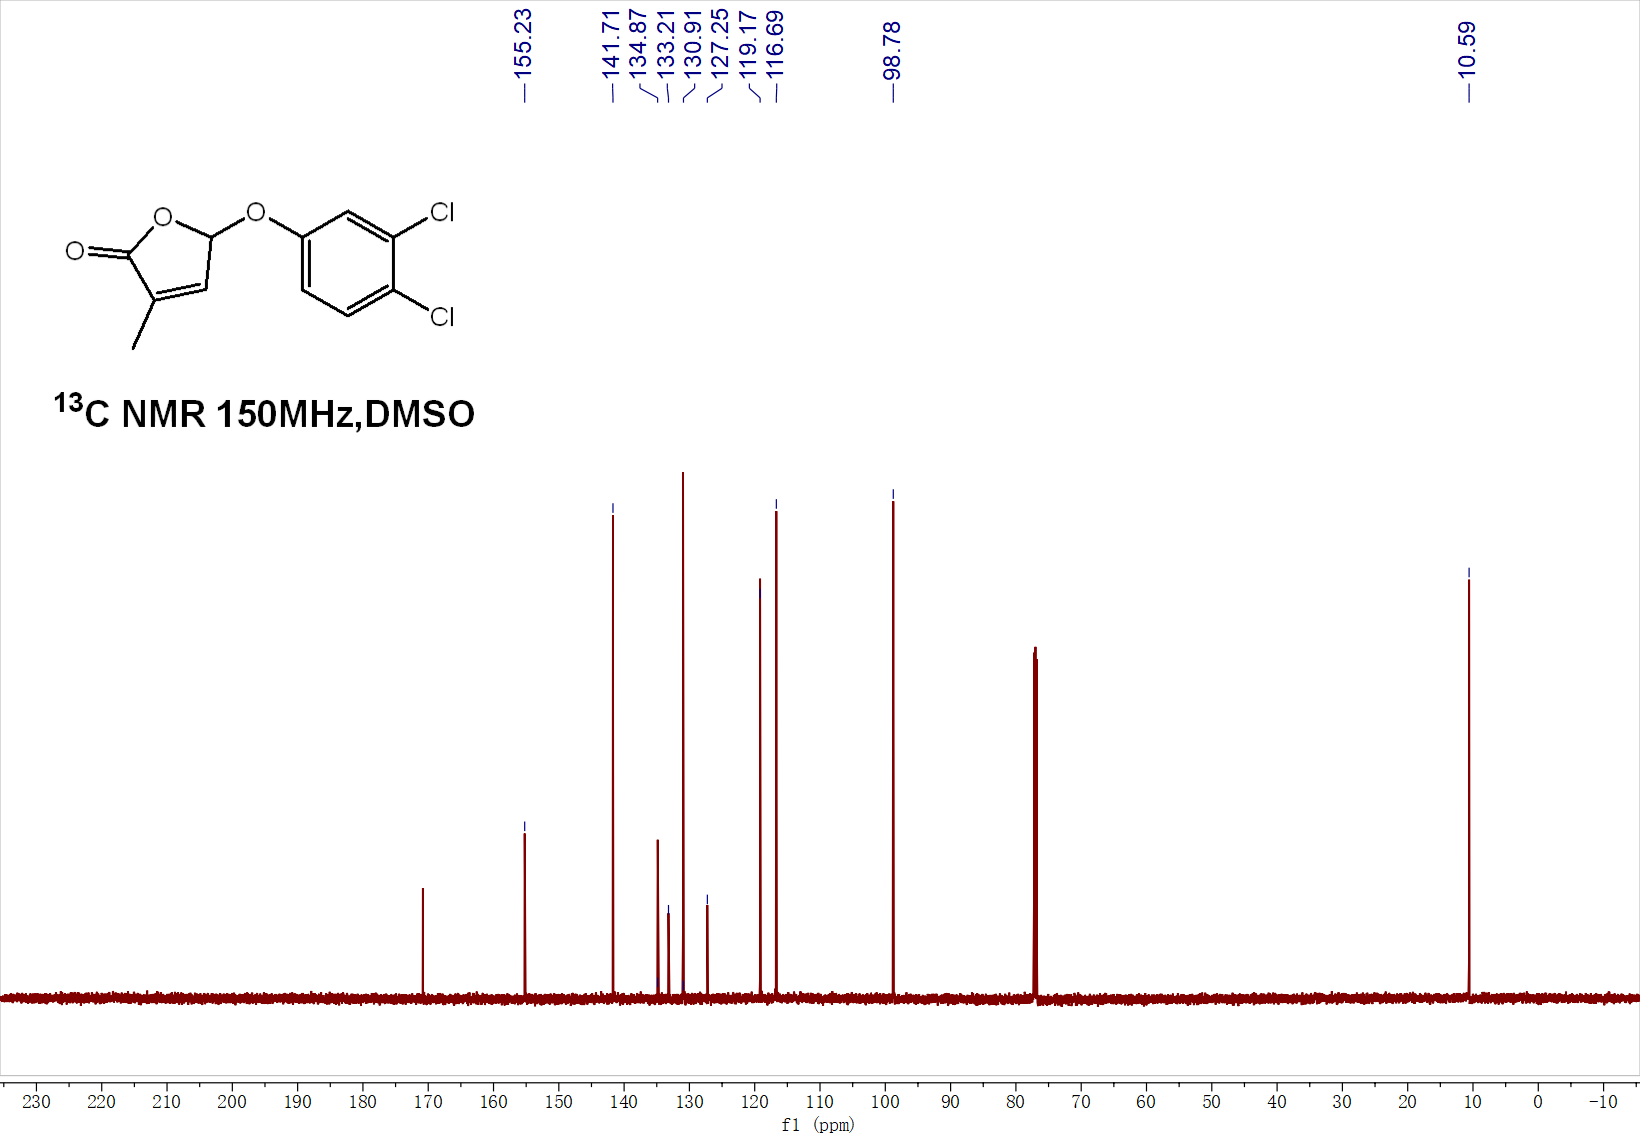


**1H NMR of 3x**


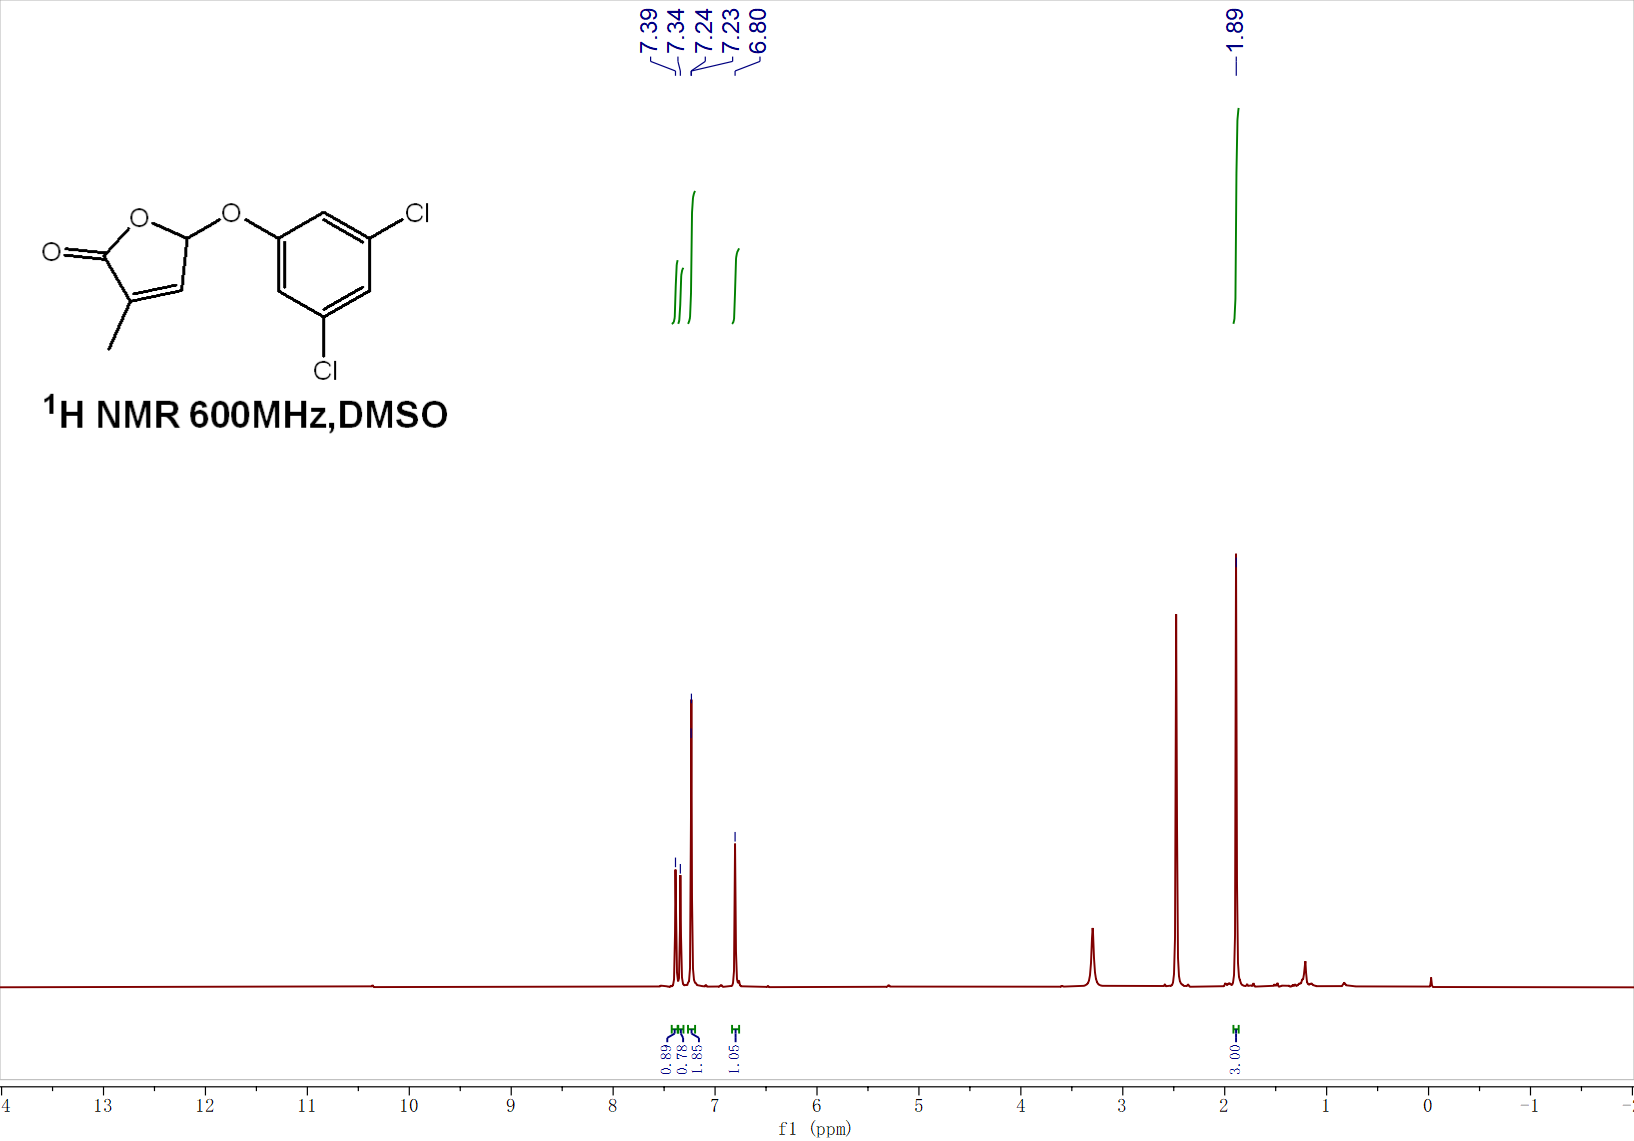


**13C NMR of 3x**


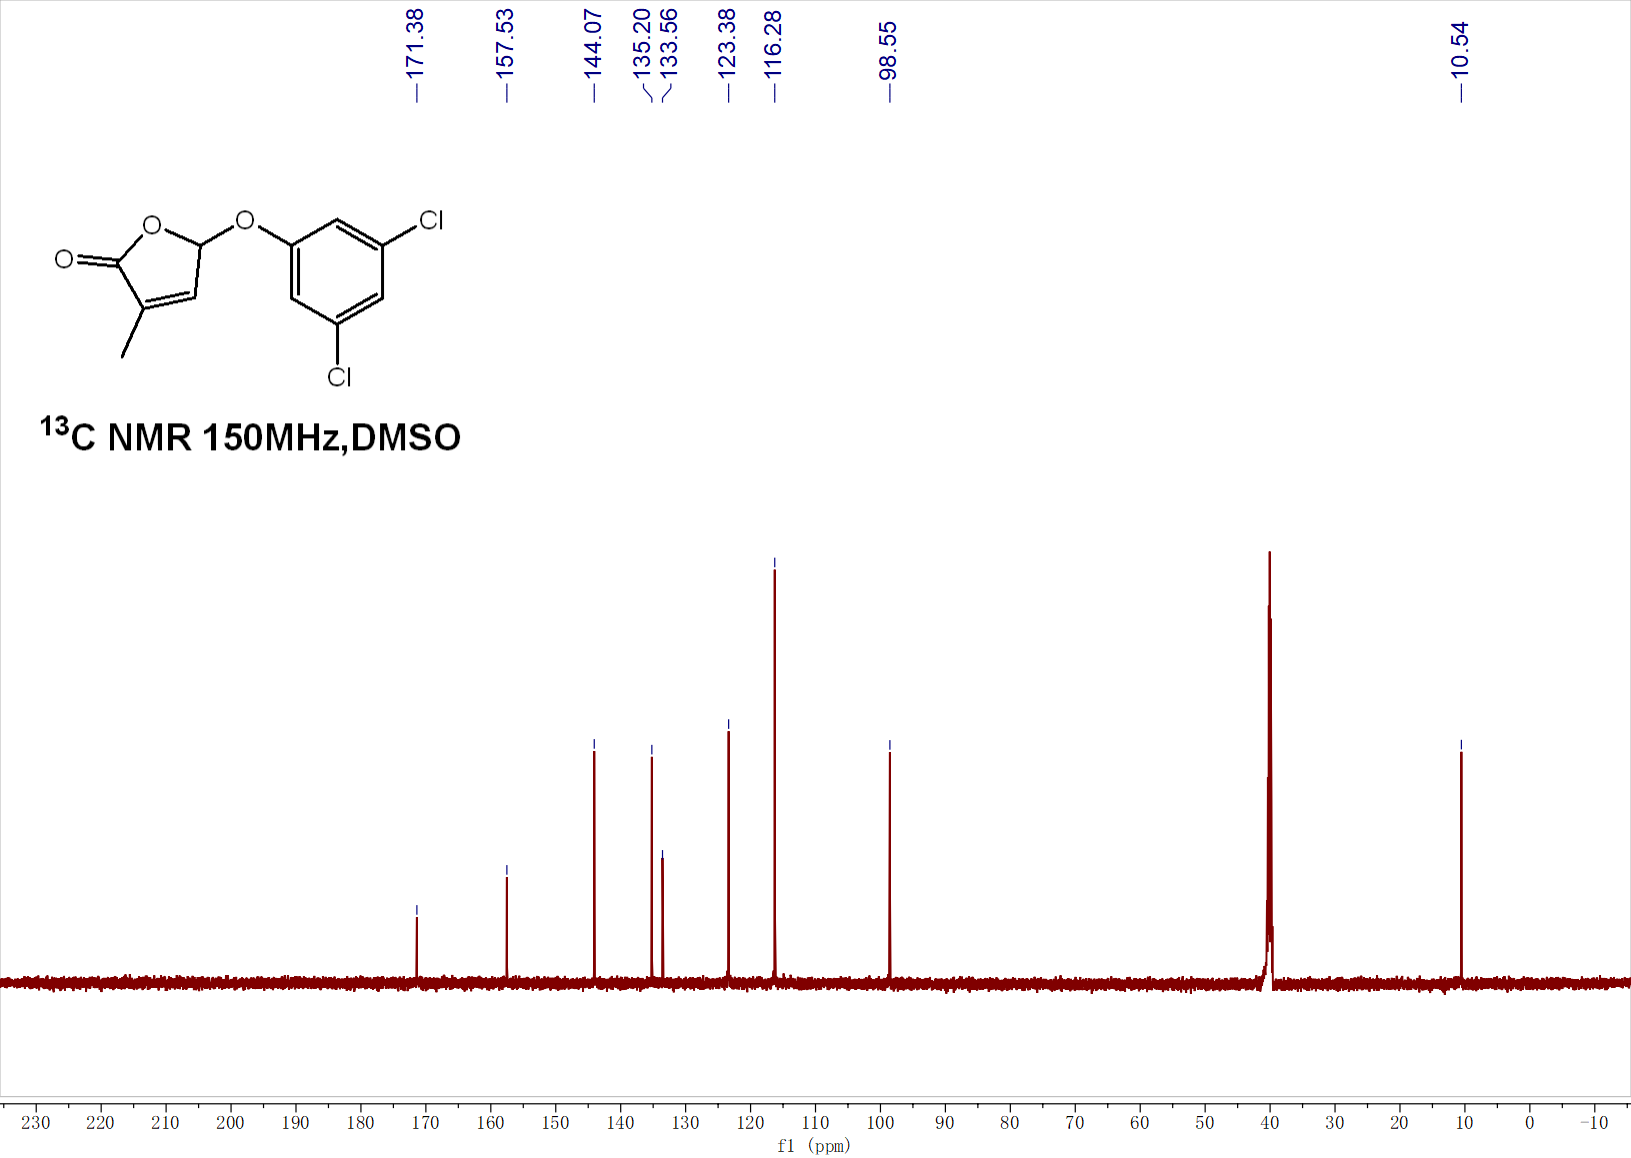


**1H NMR of 3y**


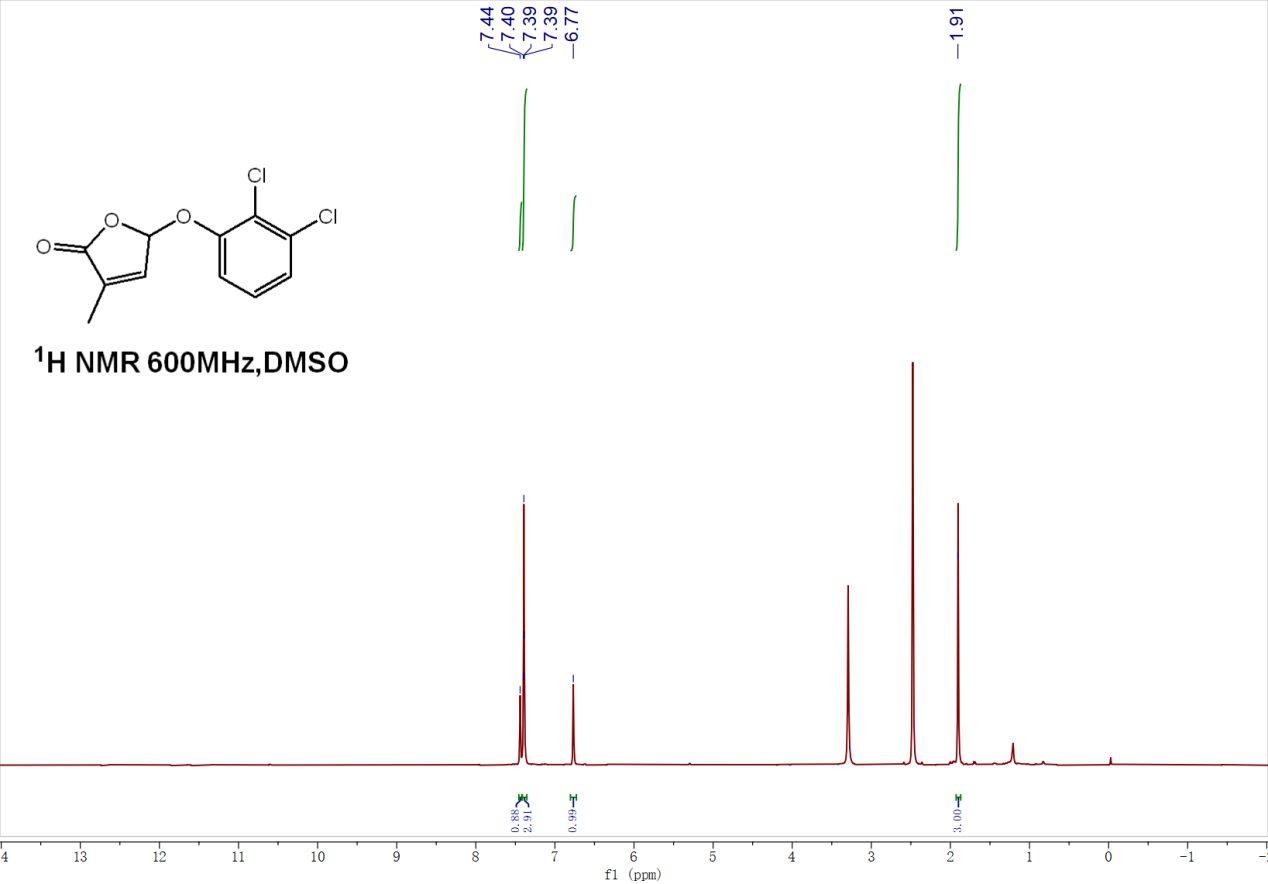


**13C NMR of 3y**


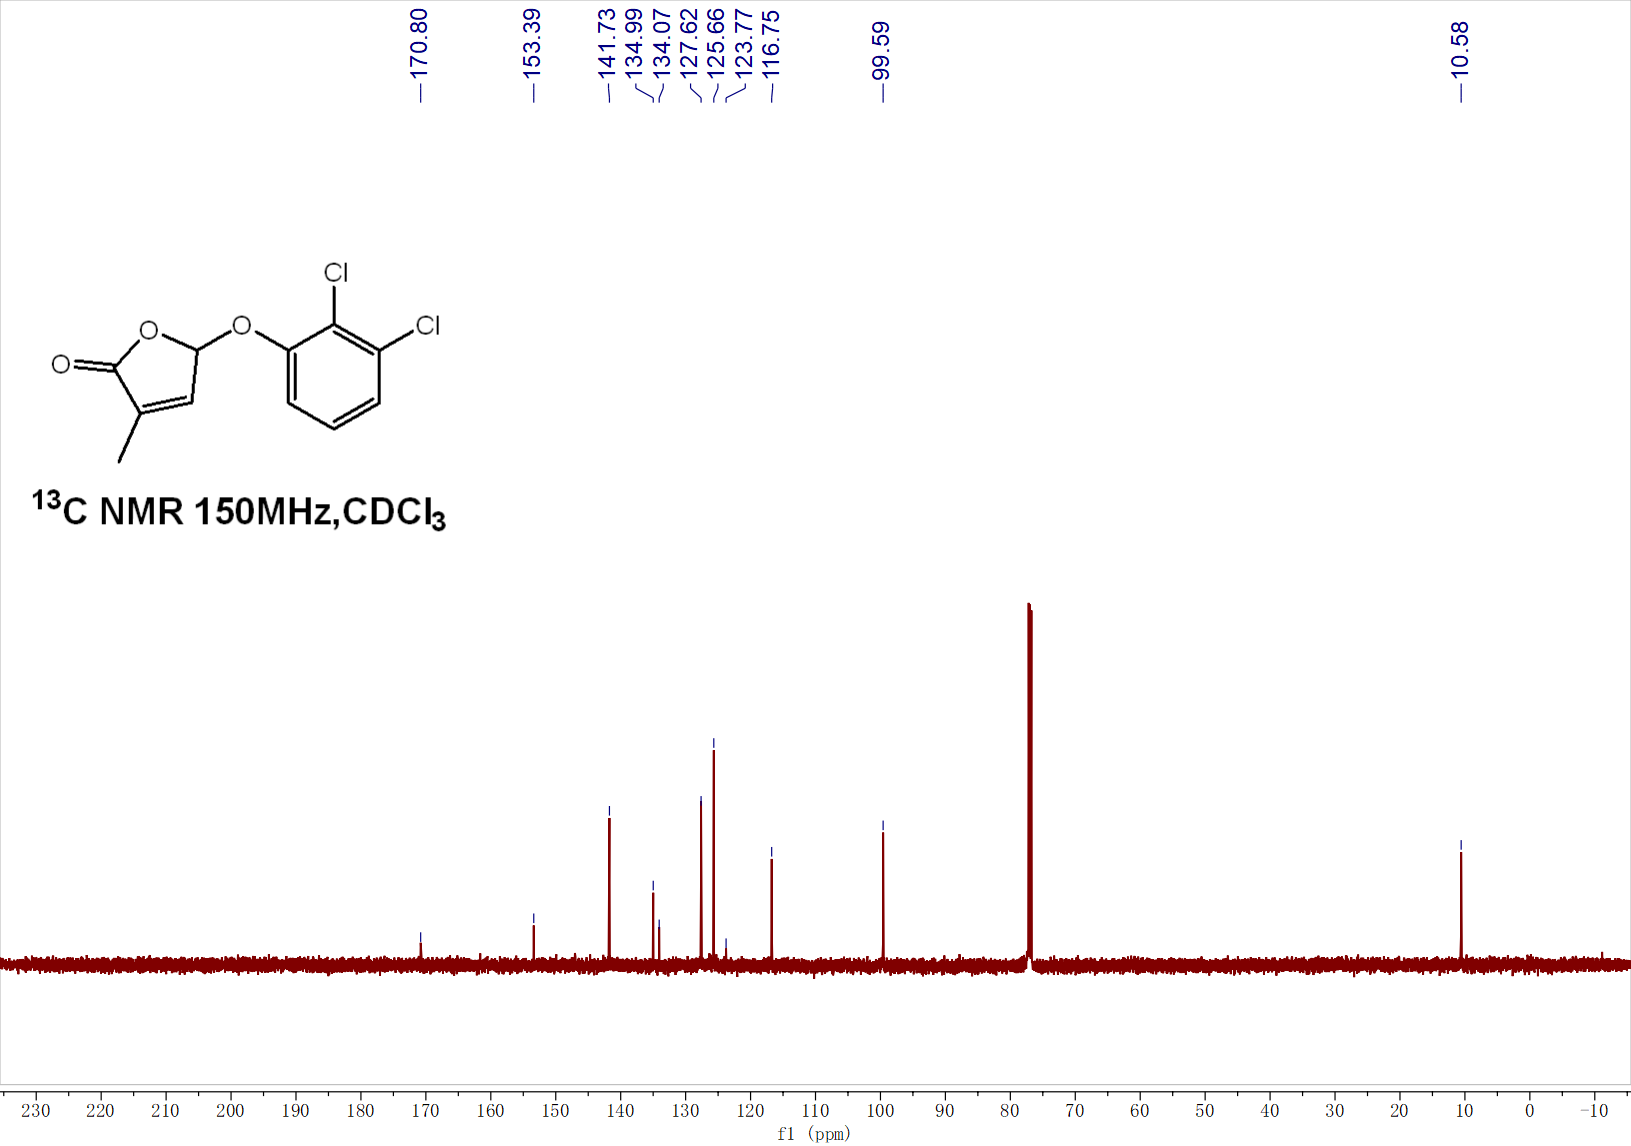


**1H NMR of 4a**


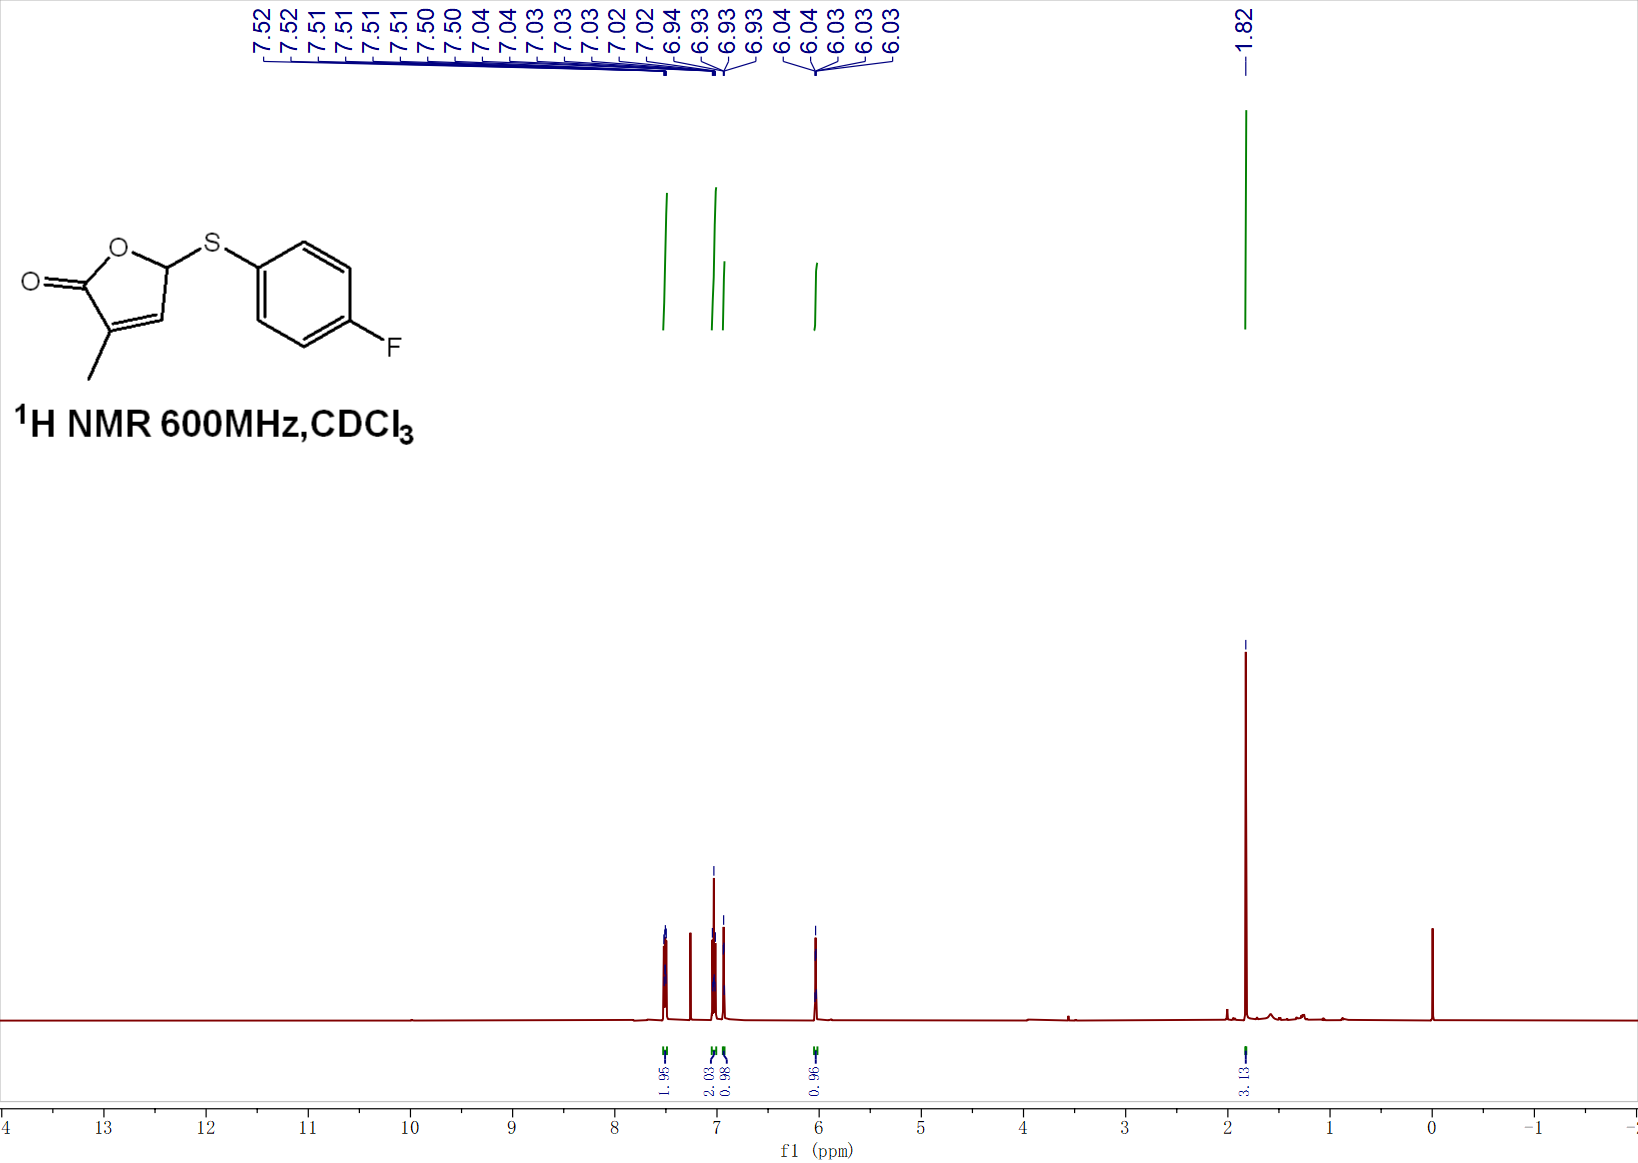


**13C NMR of 4a**


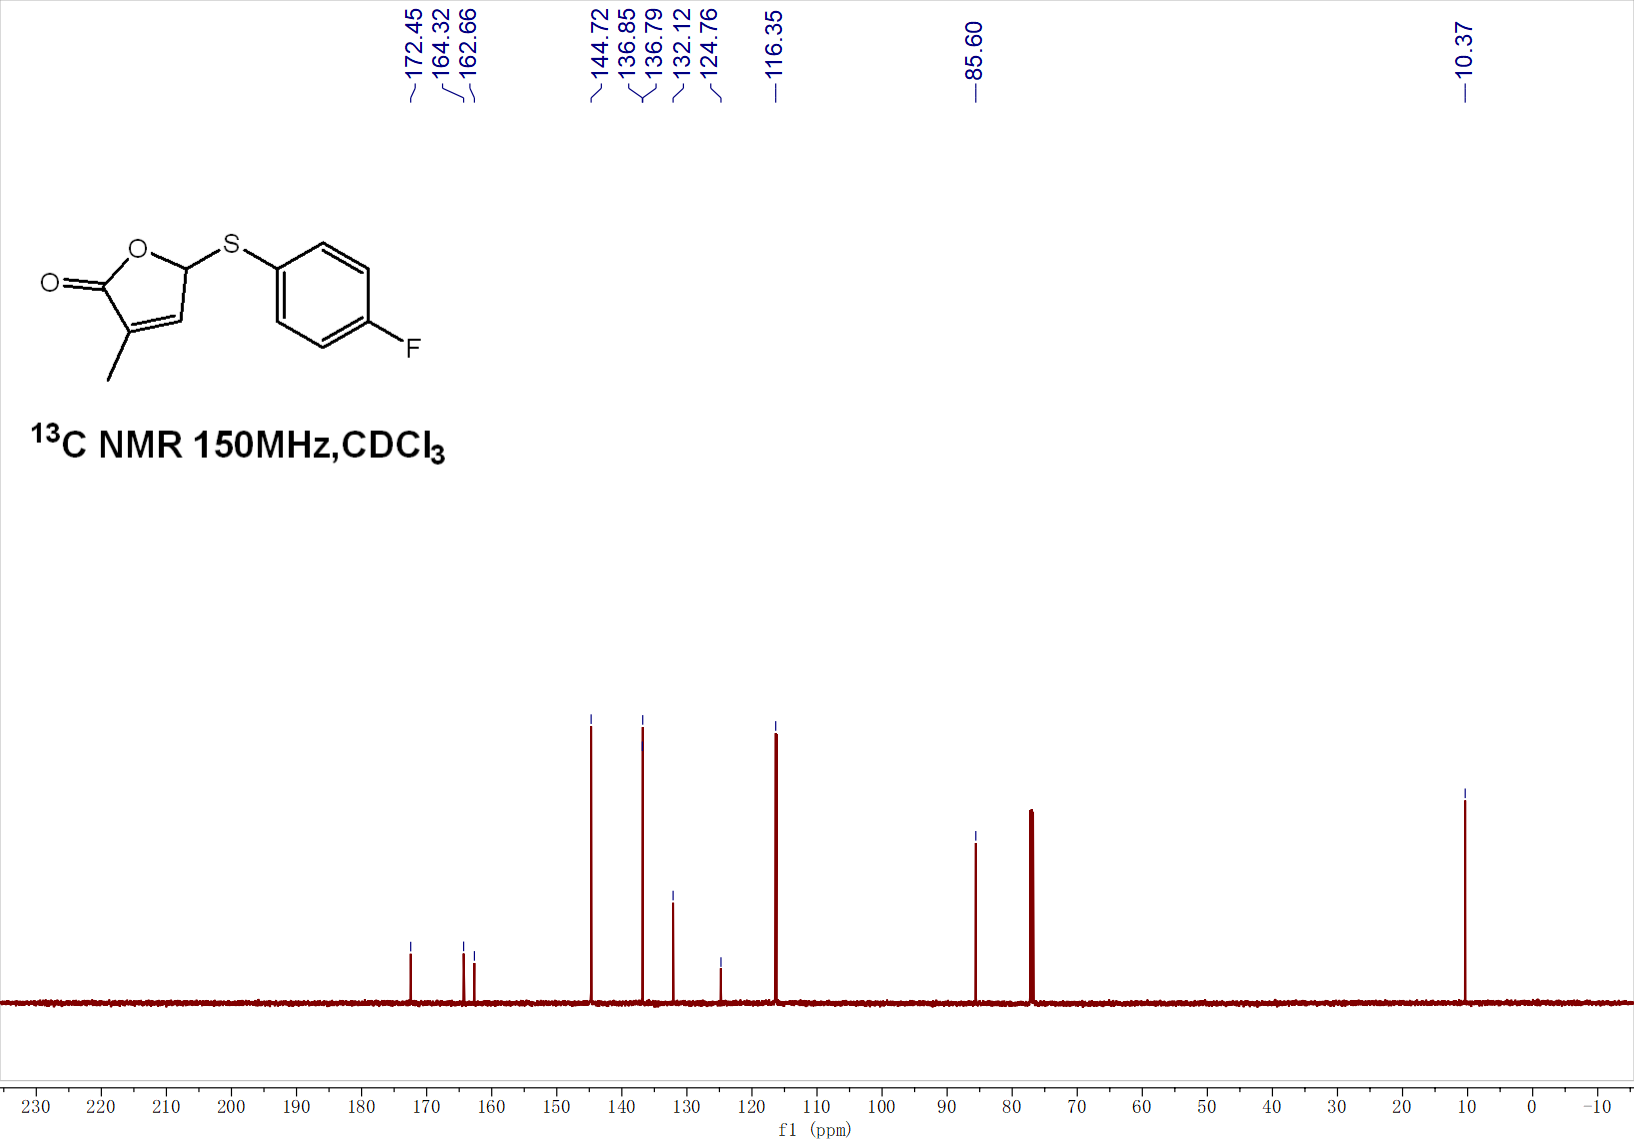


**1H NMR of 4b**


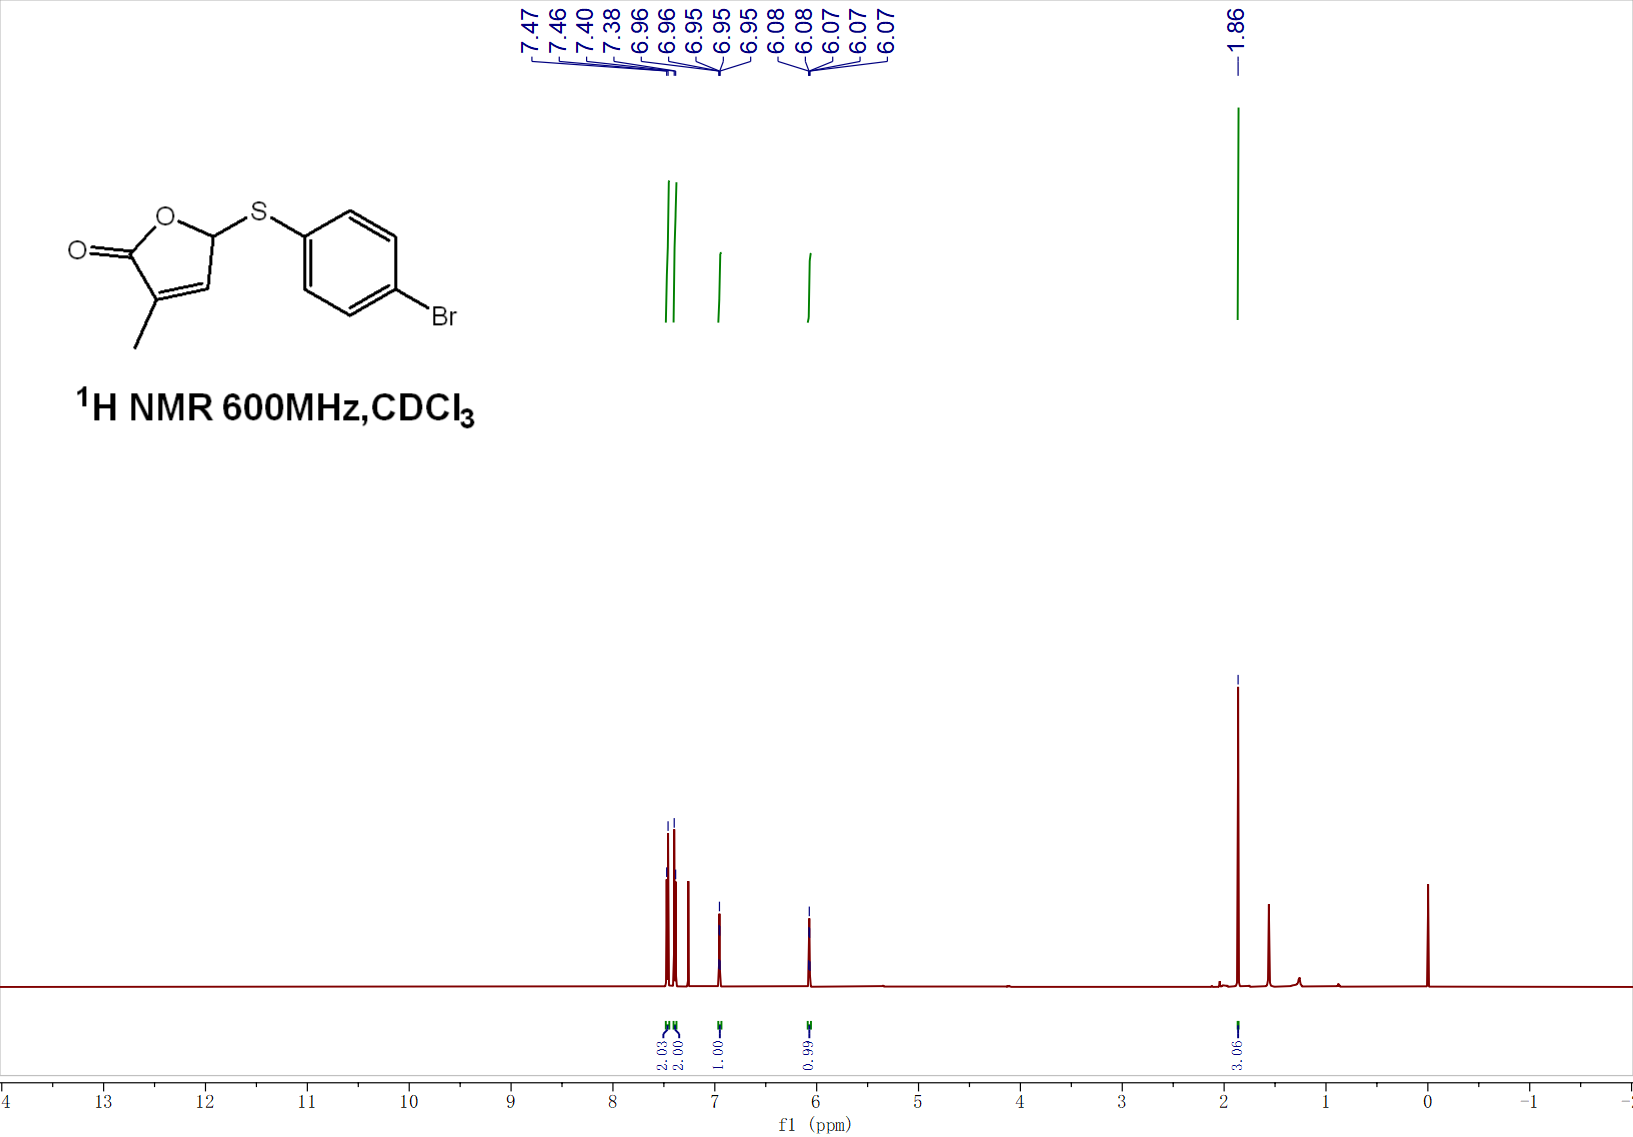


**13C NMR of 4b**


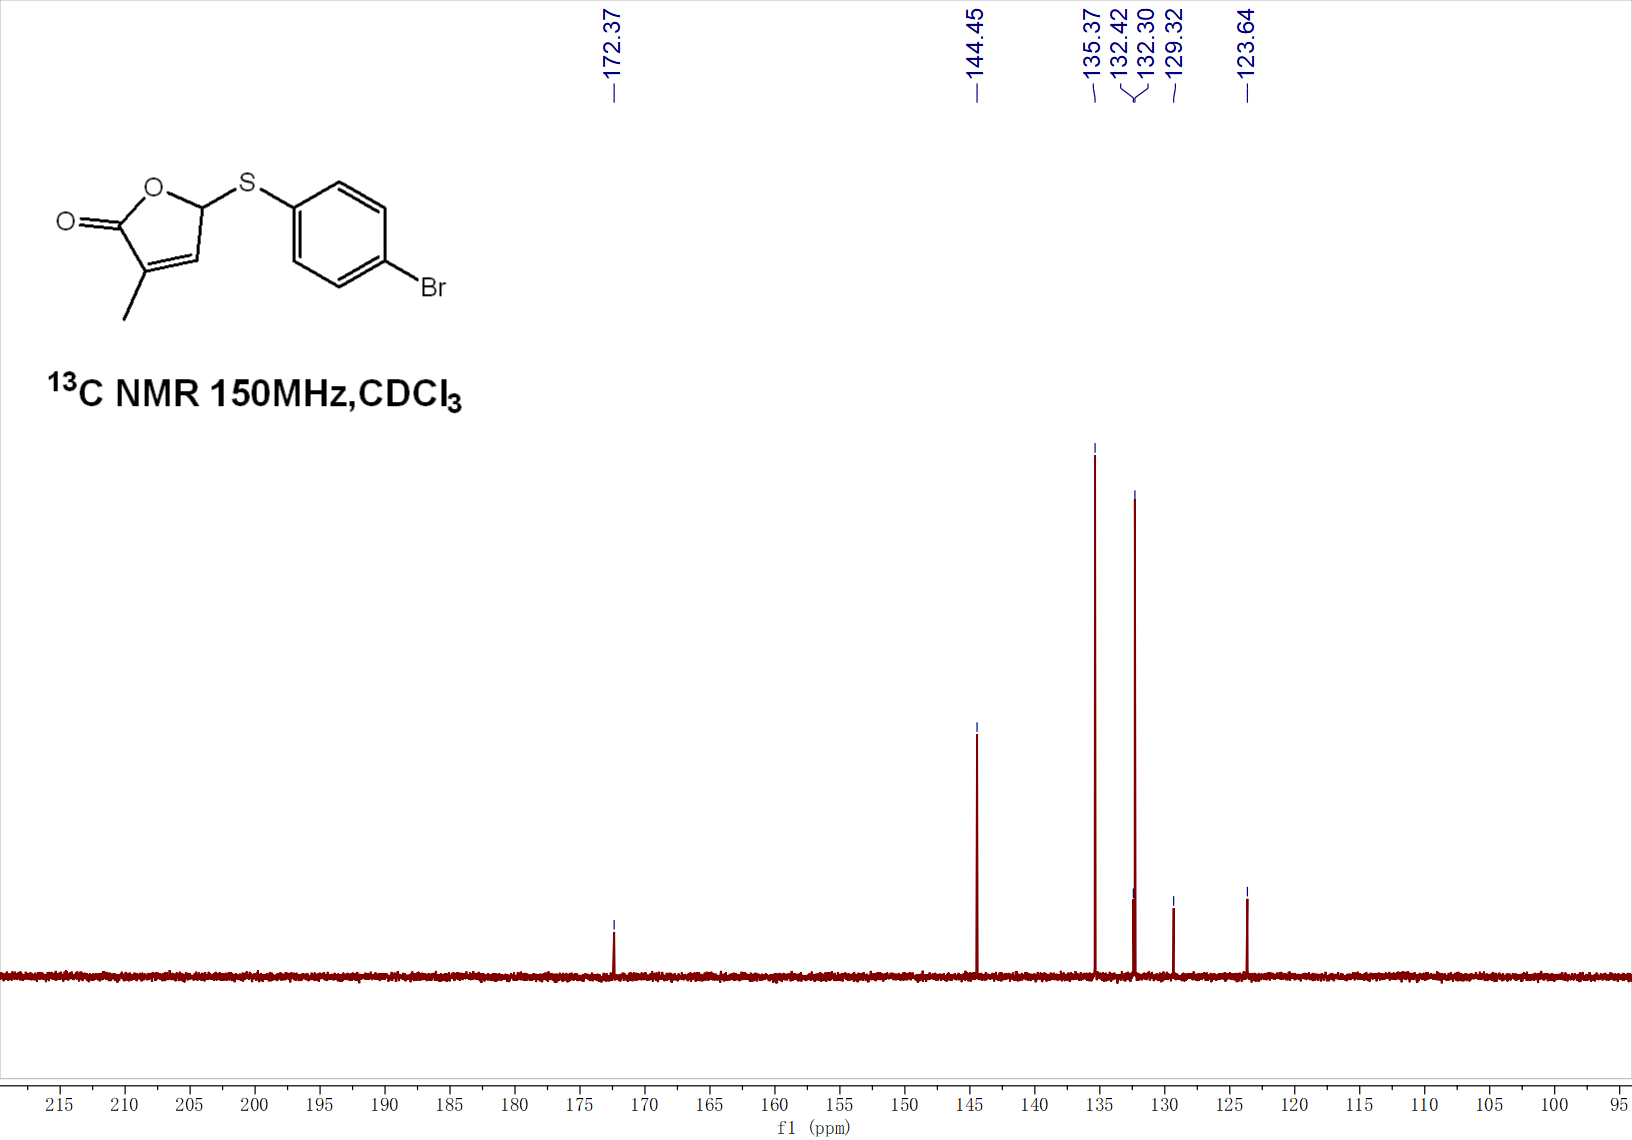


**1H NMR of 4c**


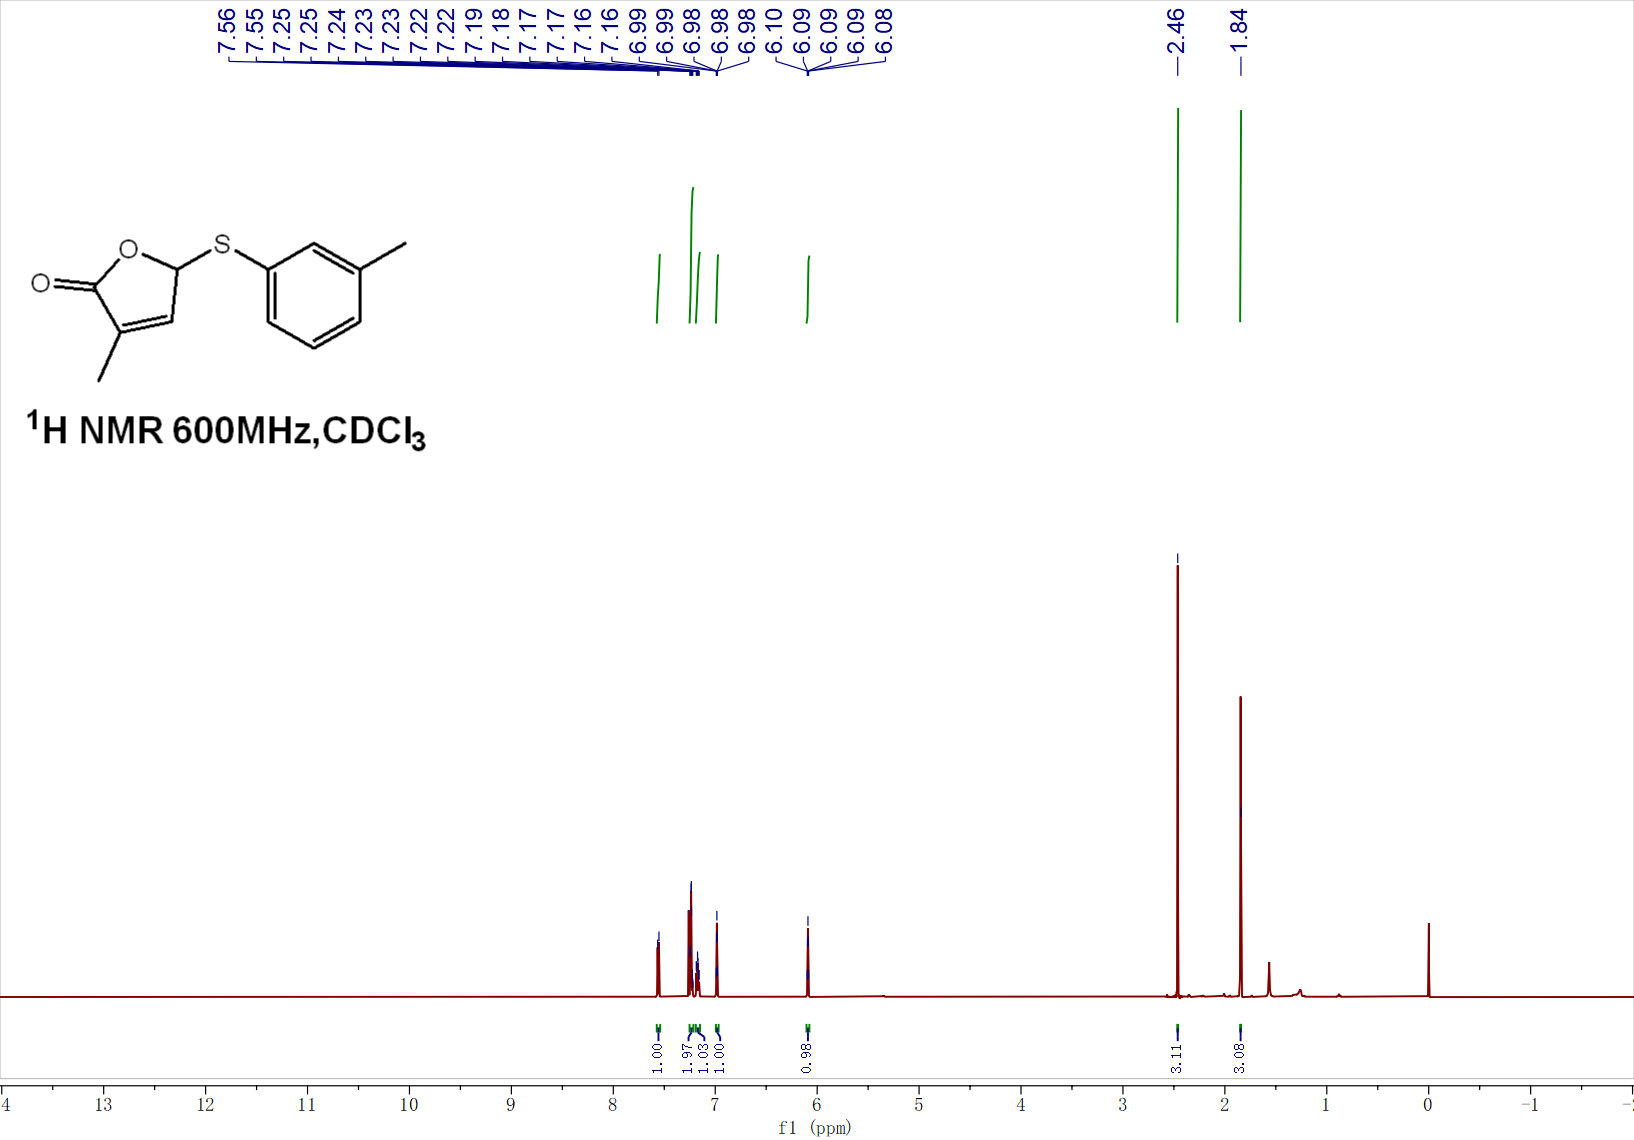


**13C NMR of 4c**


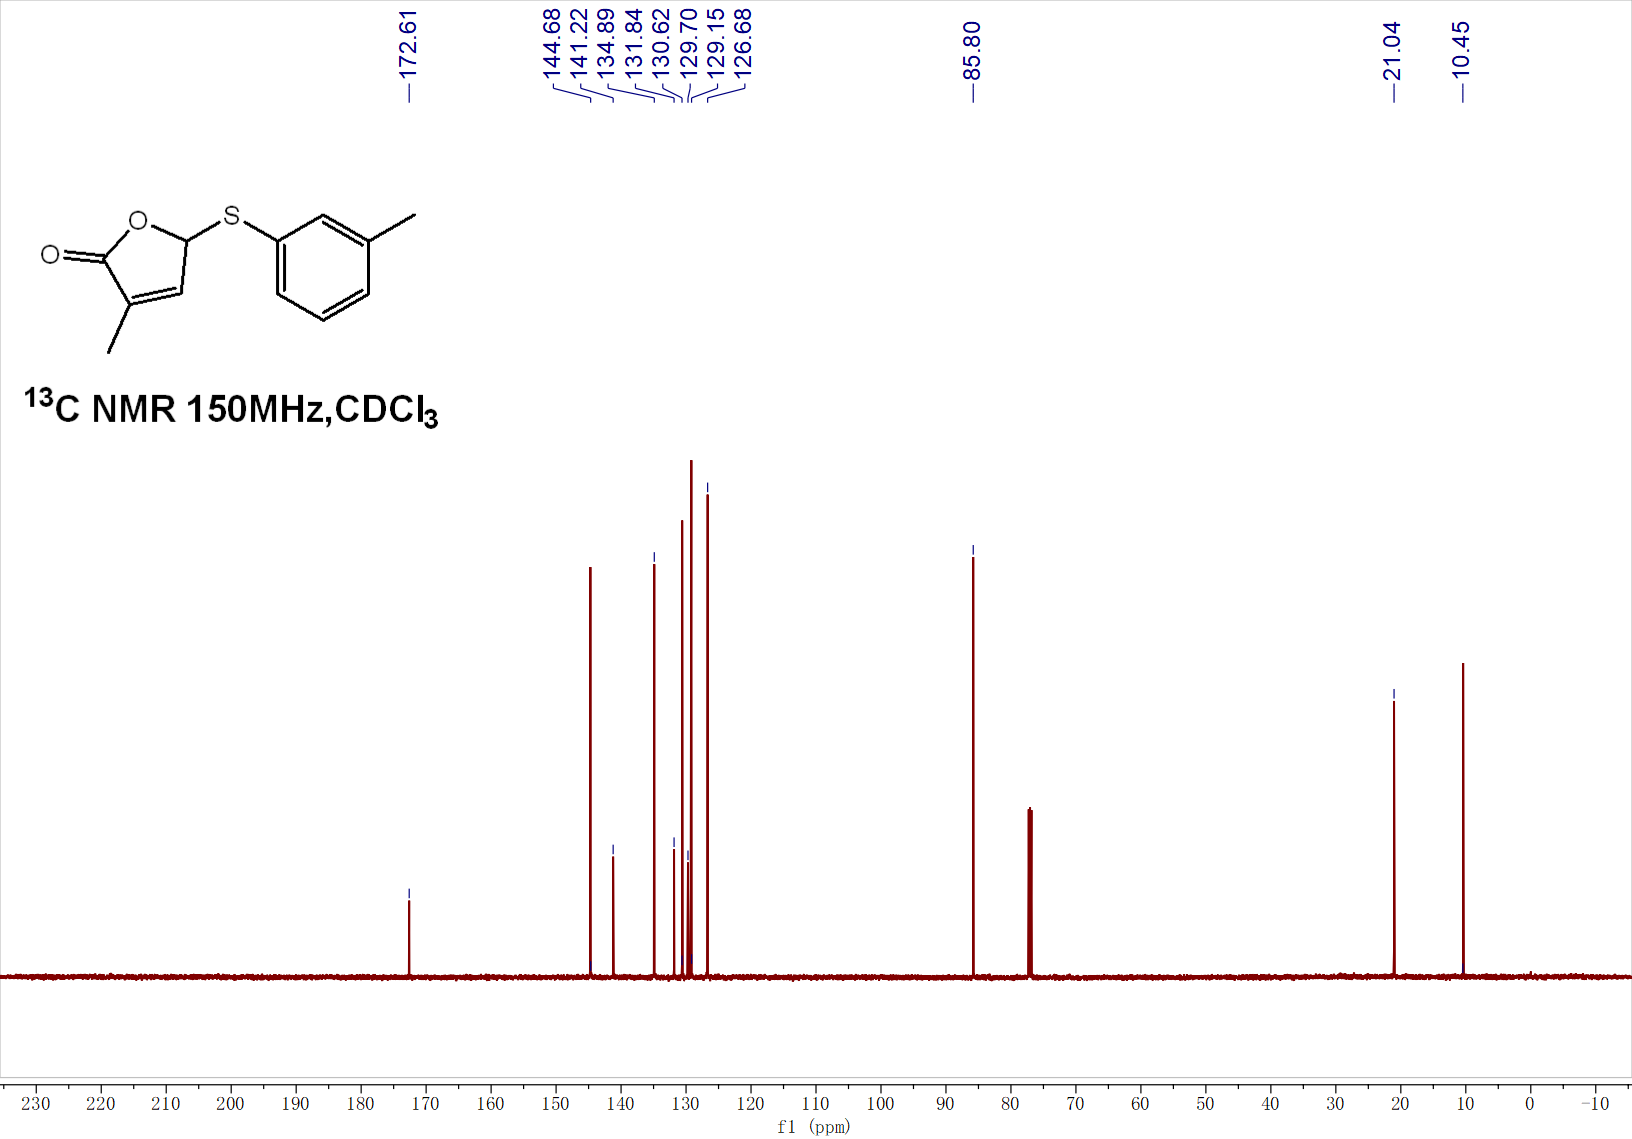


**1H NMR of 4d**


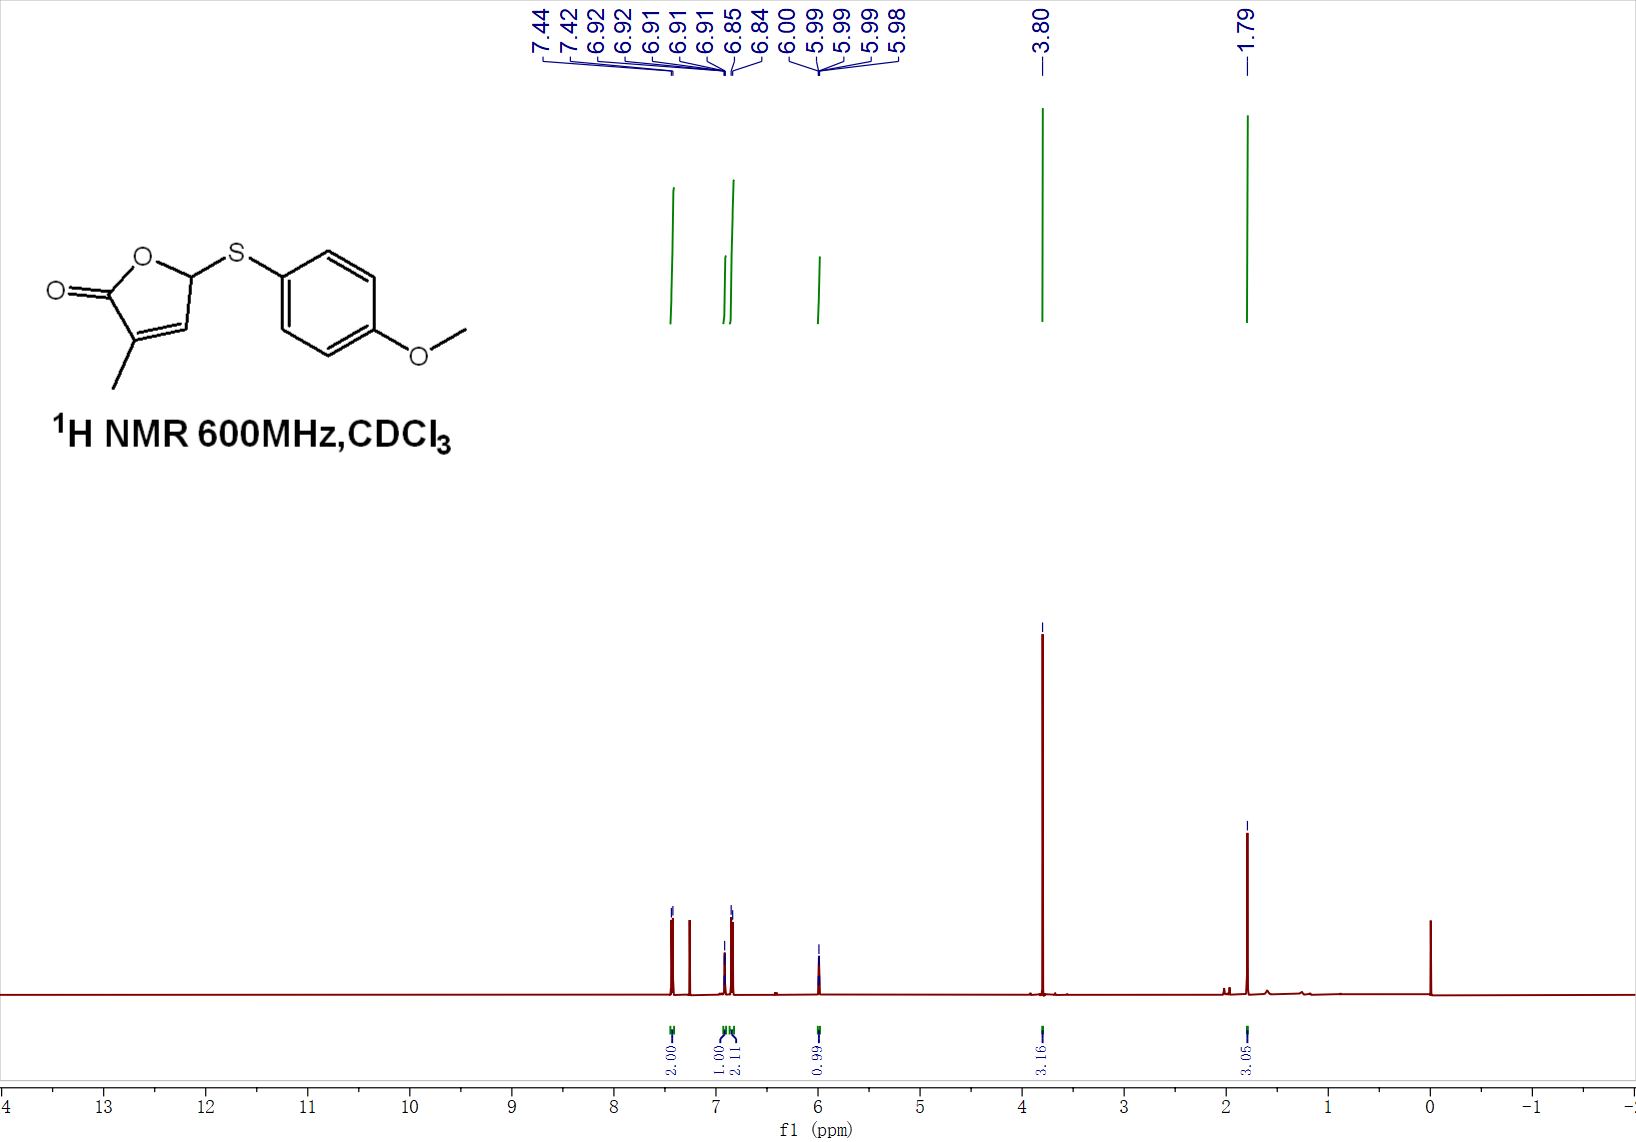


**13C NMR of 4d**


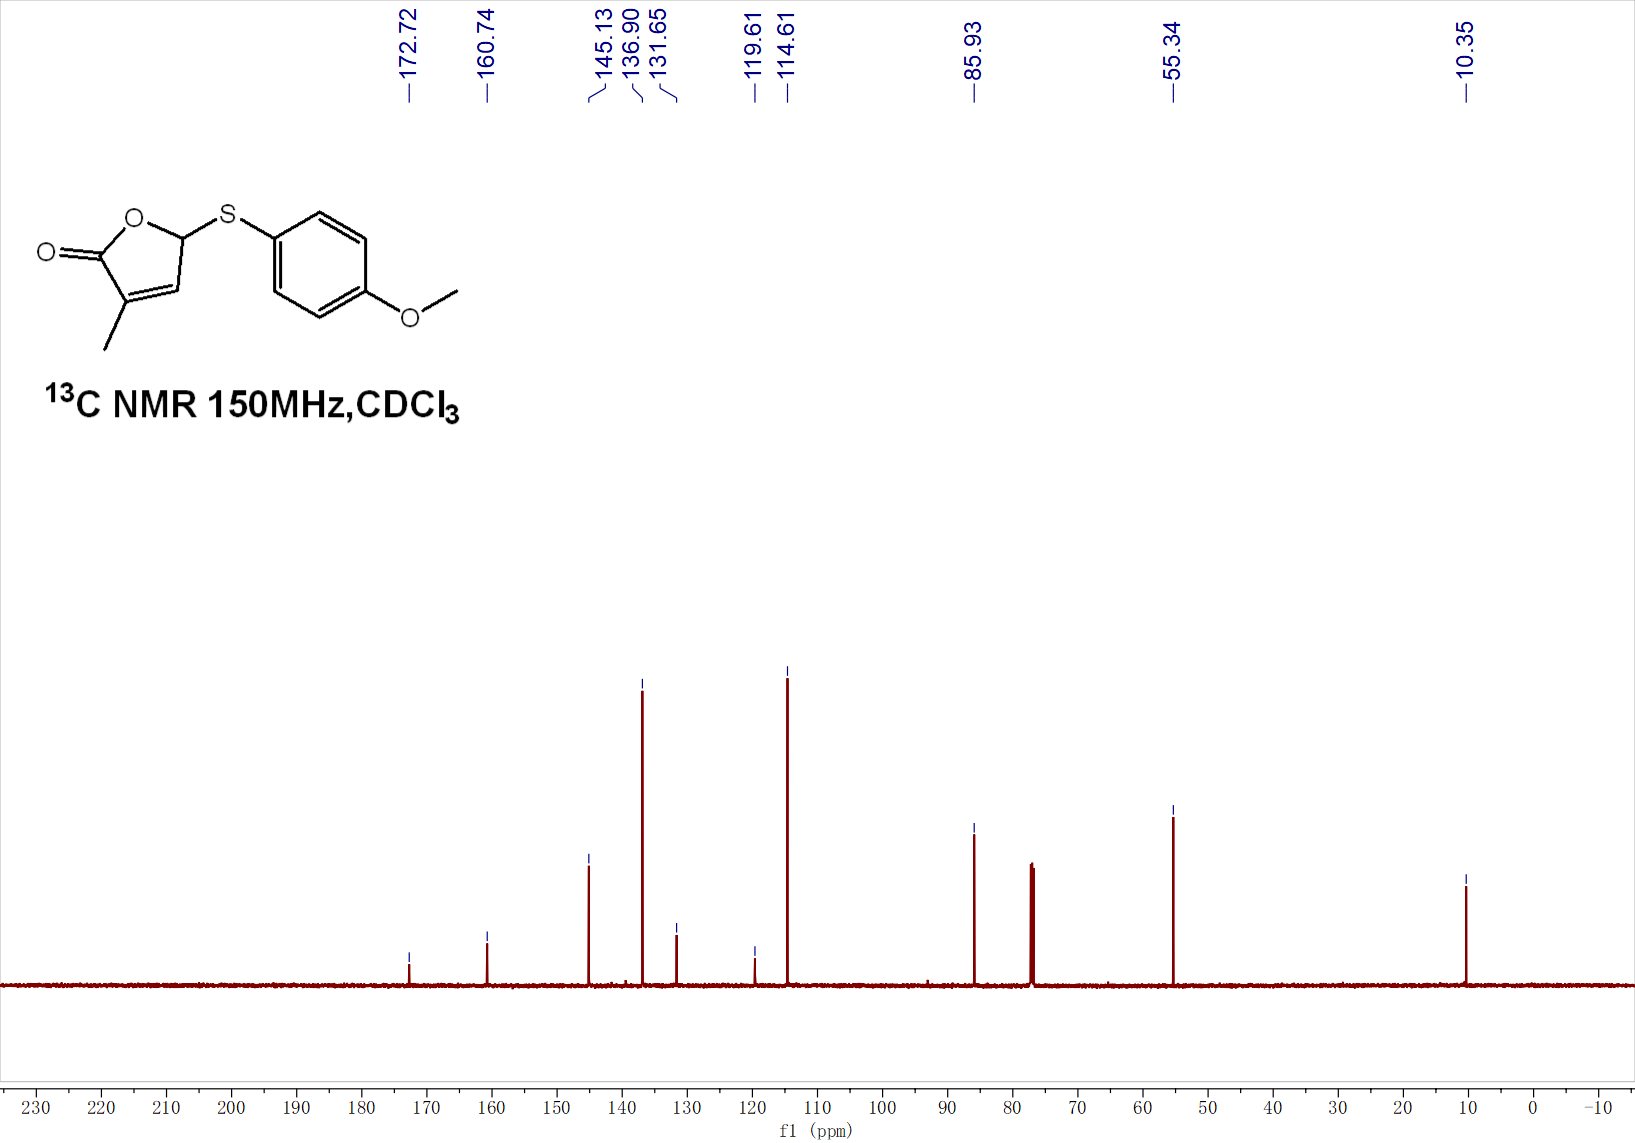


**1H NMR of 4e**


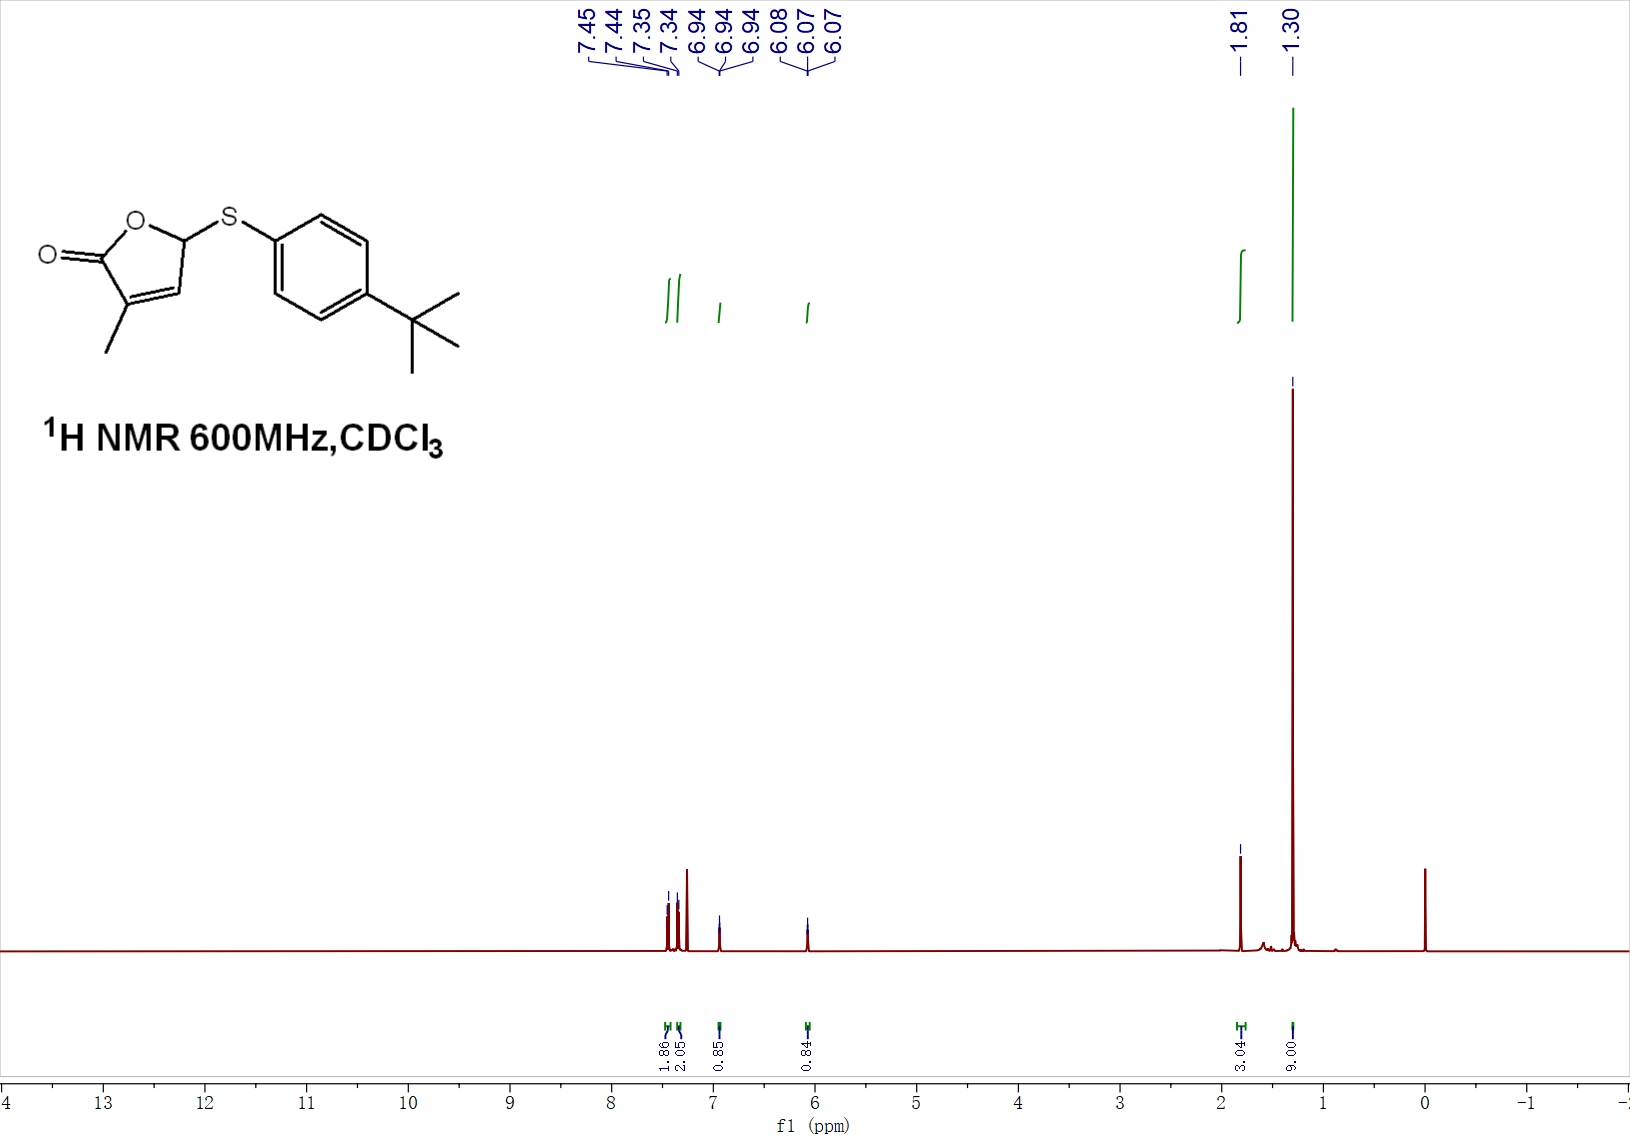


**13C NMR of 4e**


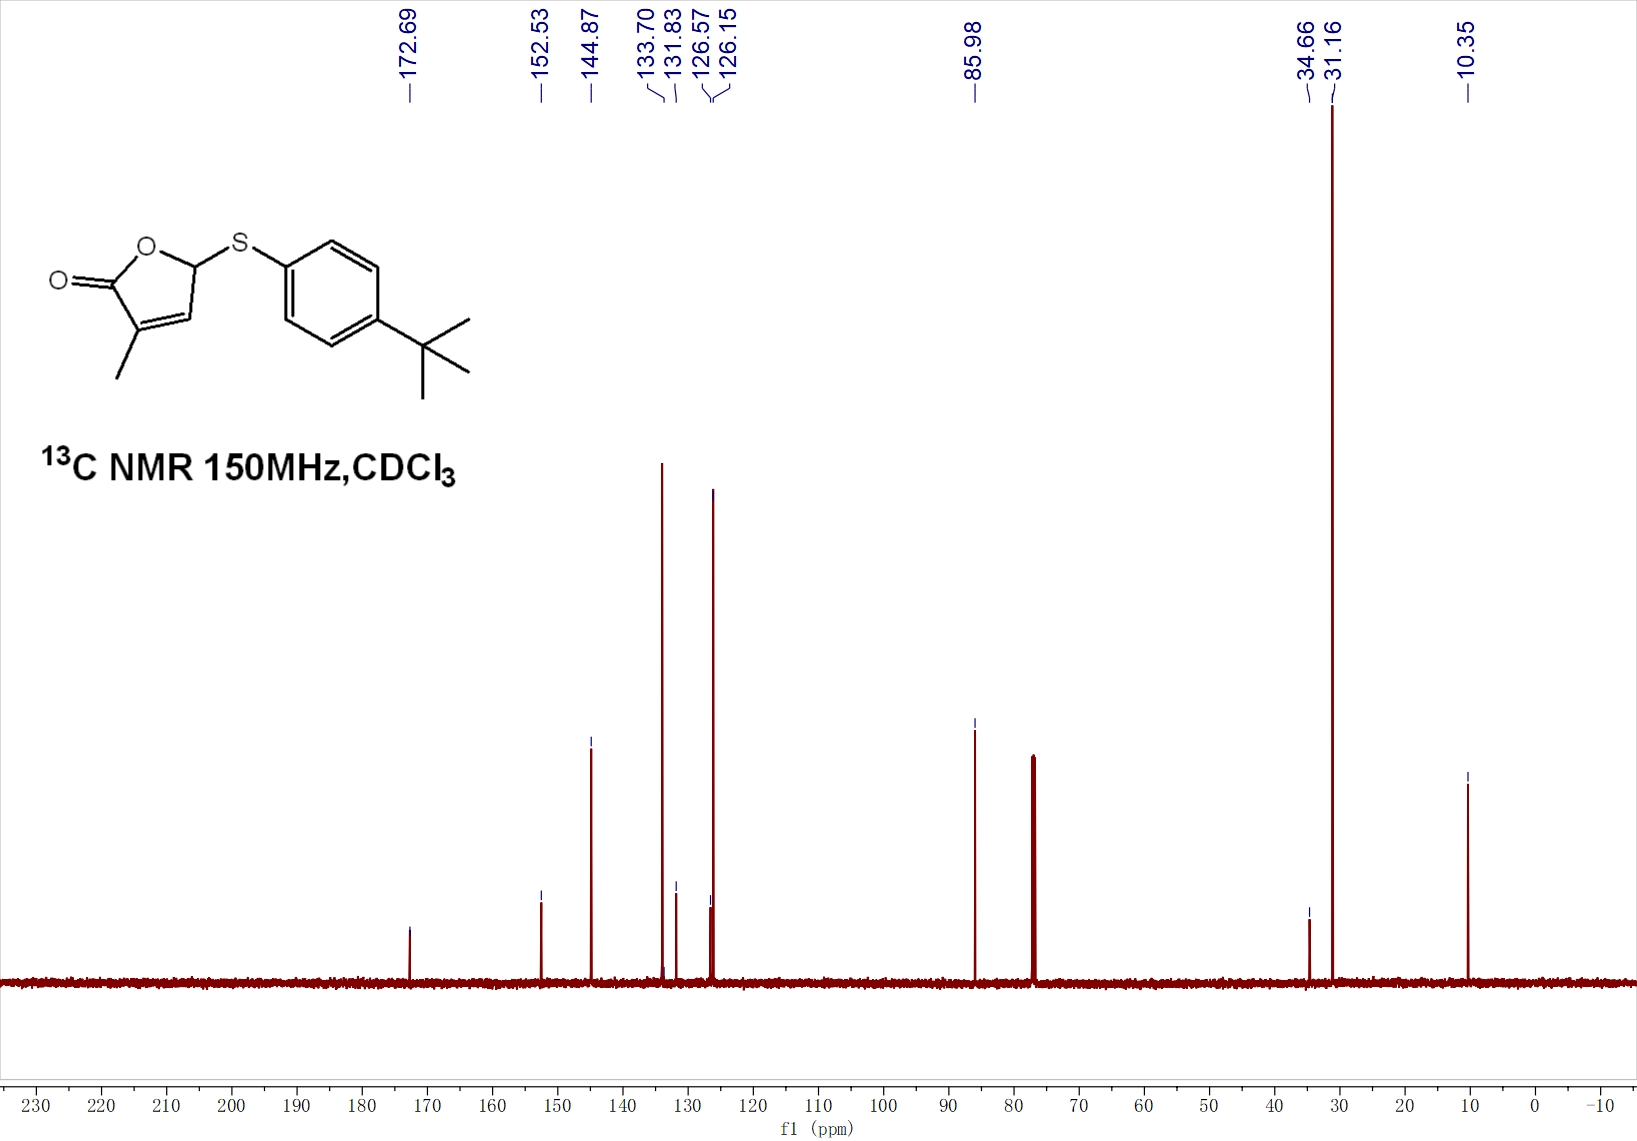


**1H NMR of 4f**


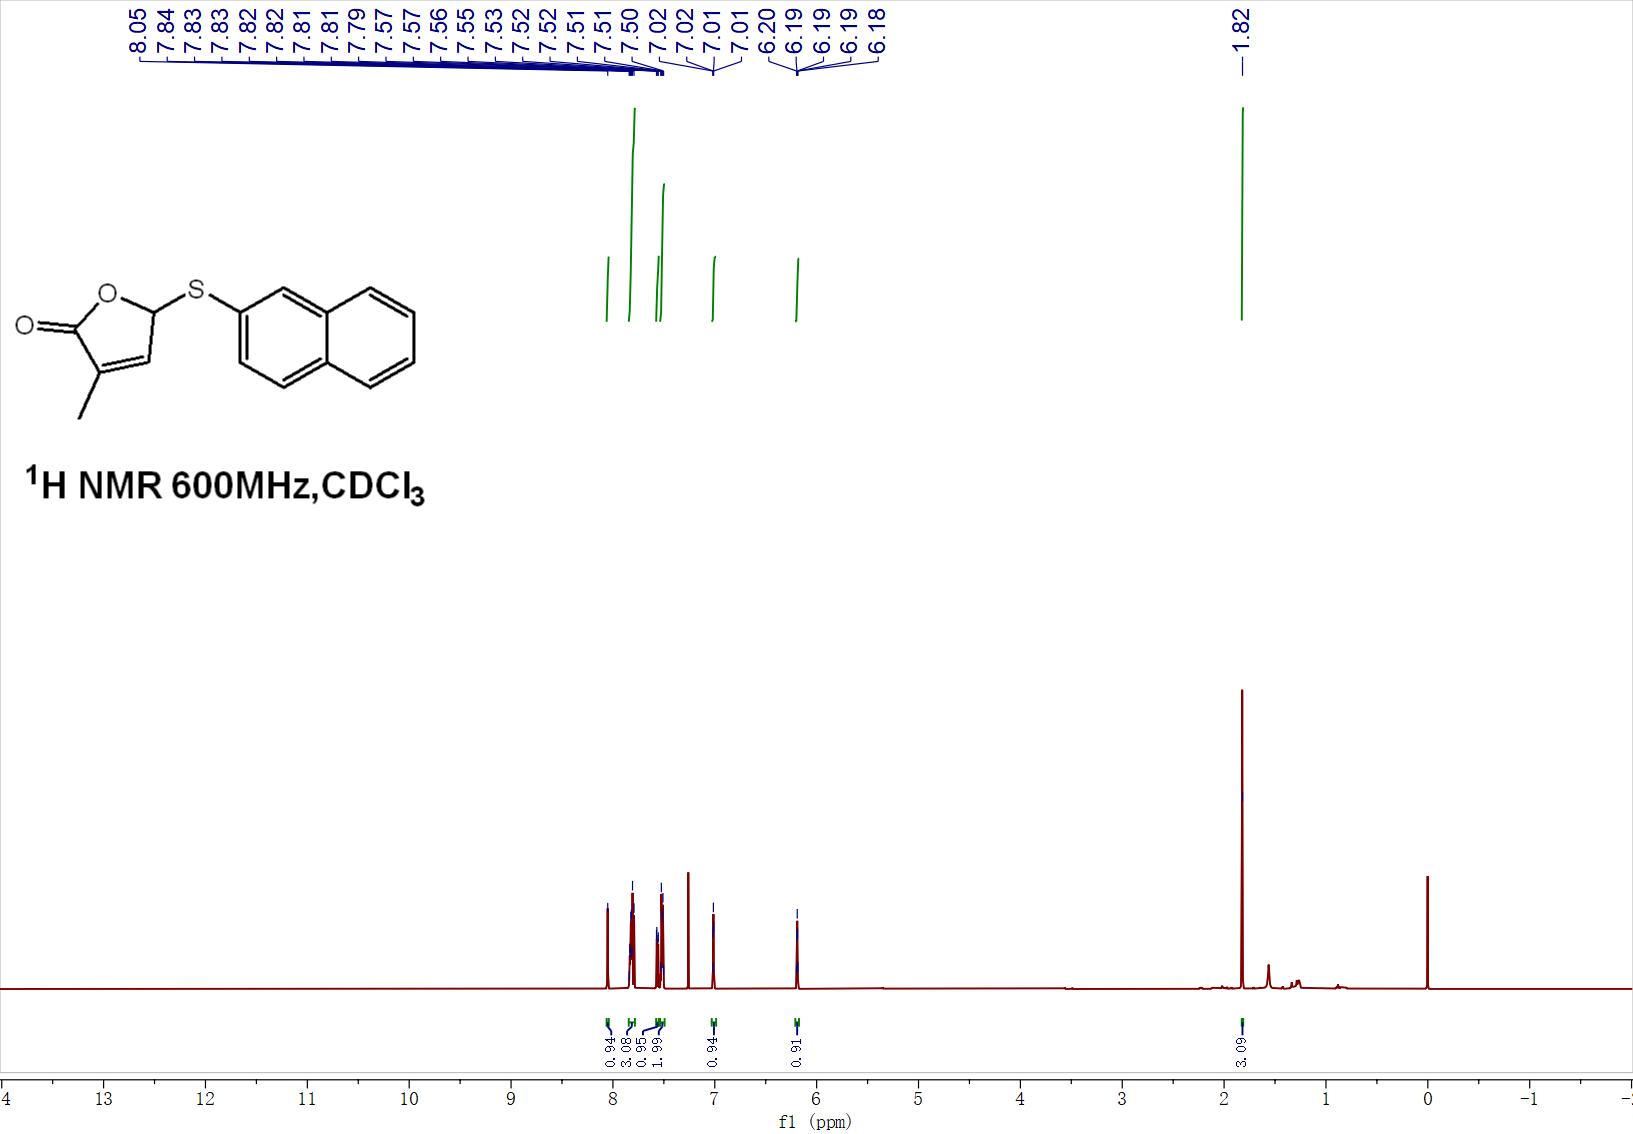


**13C NMR of 4f**


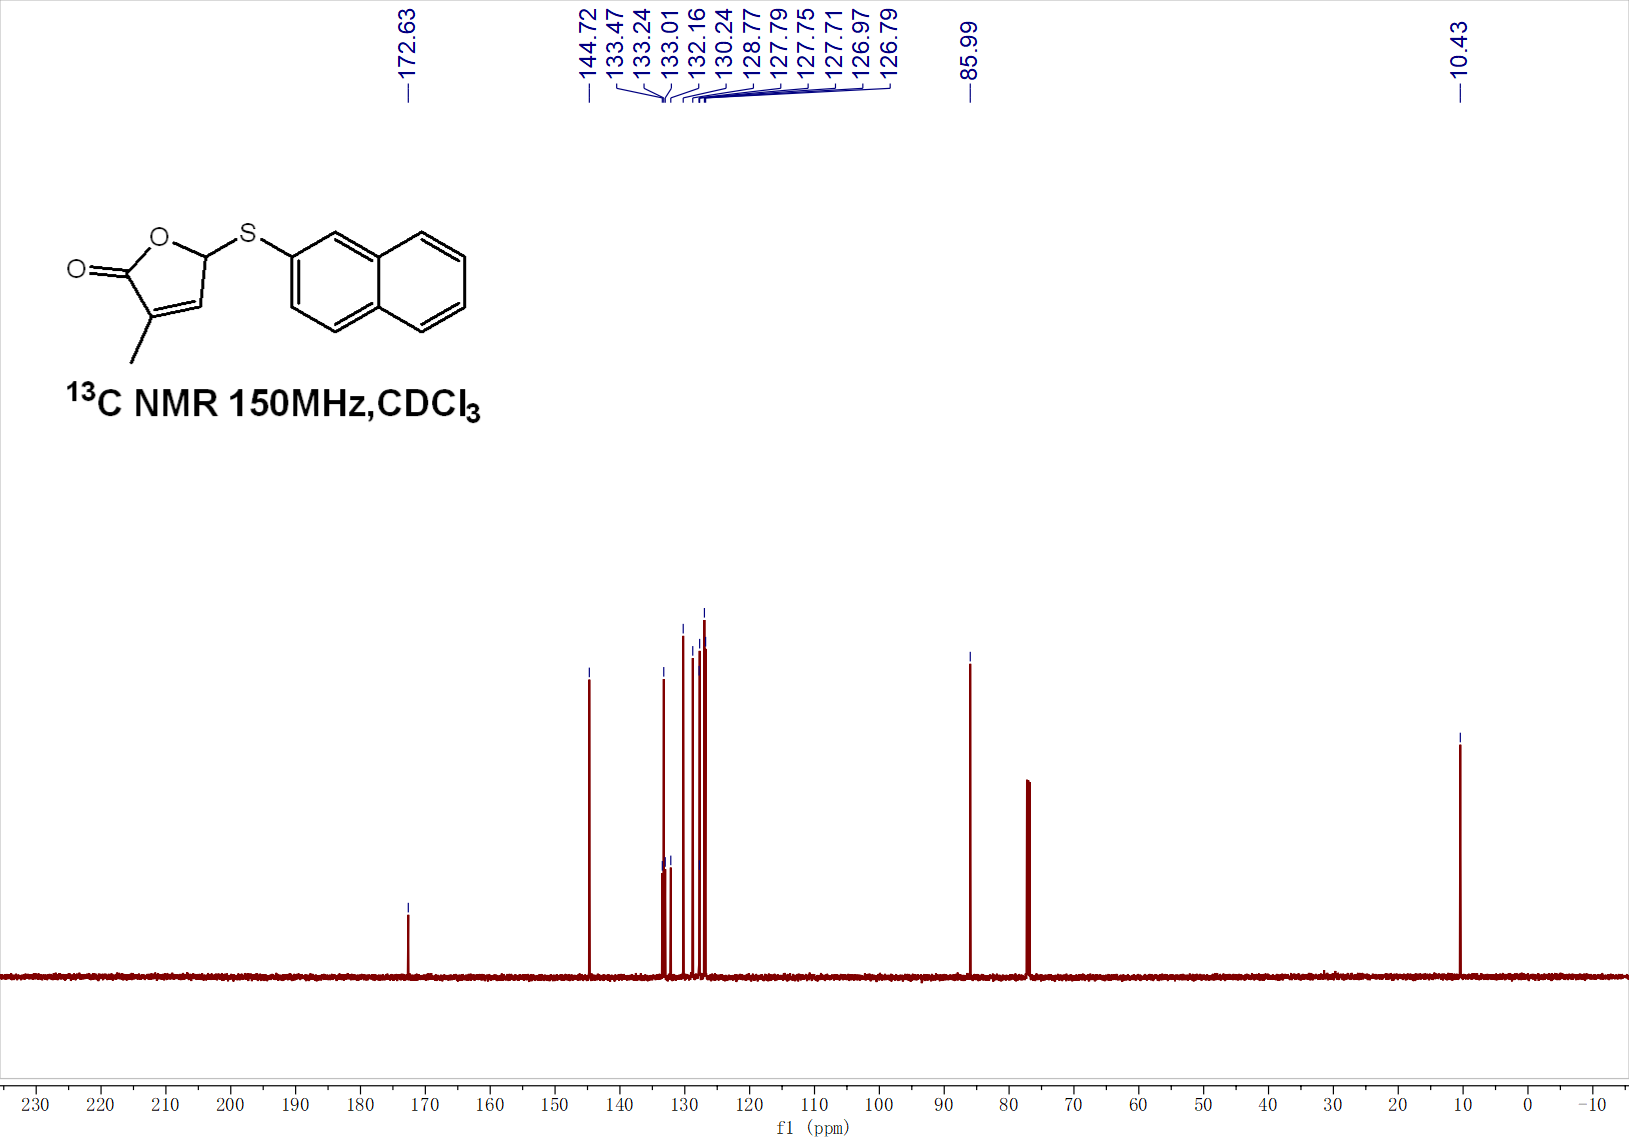


**1H NMR of 4g**


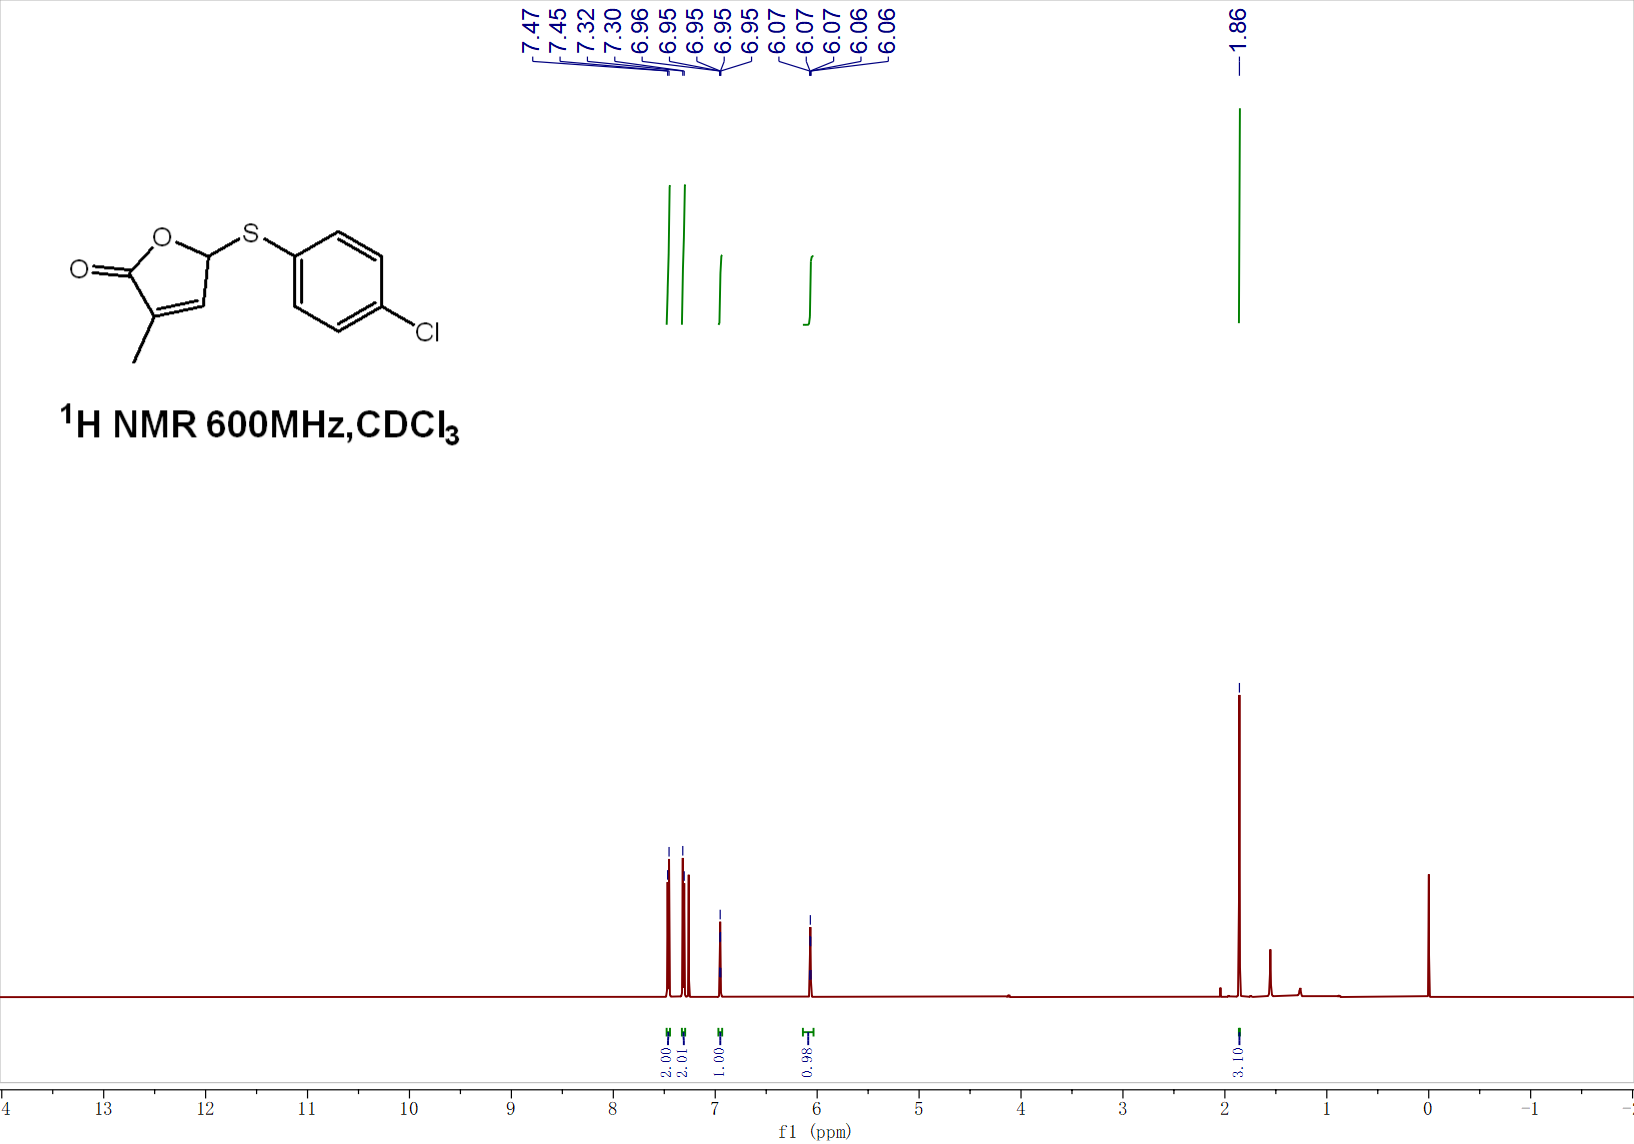


**13C NMR of 4g**


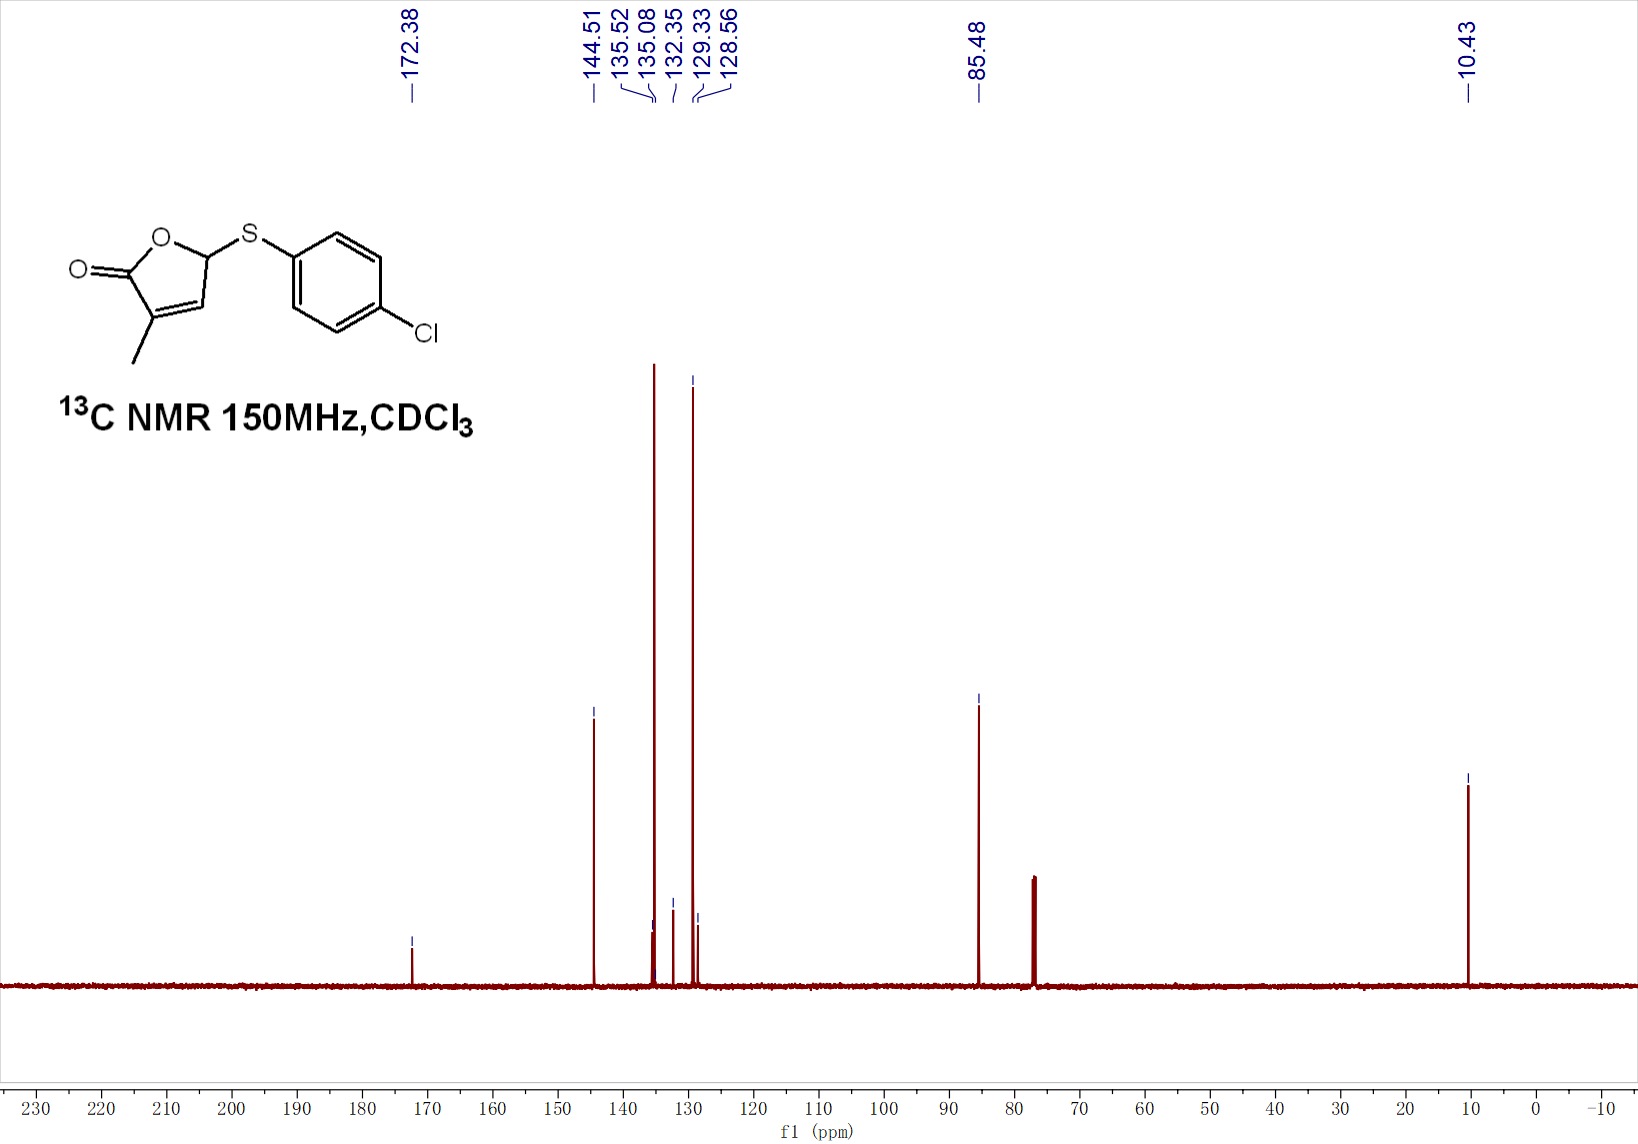


**1H NMR of 4h**


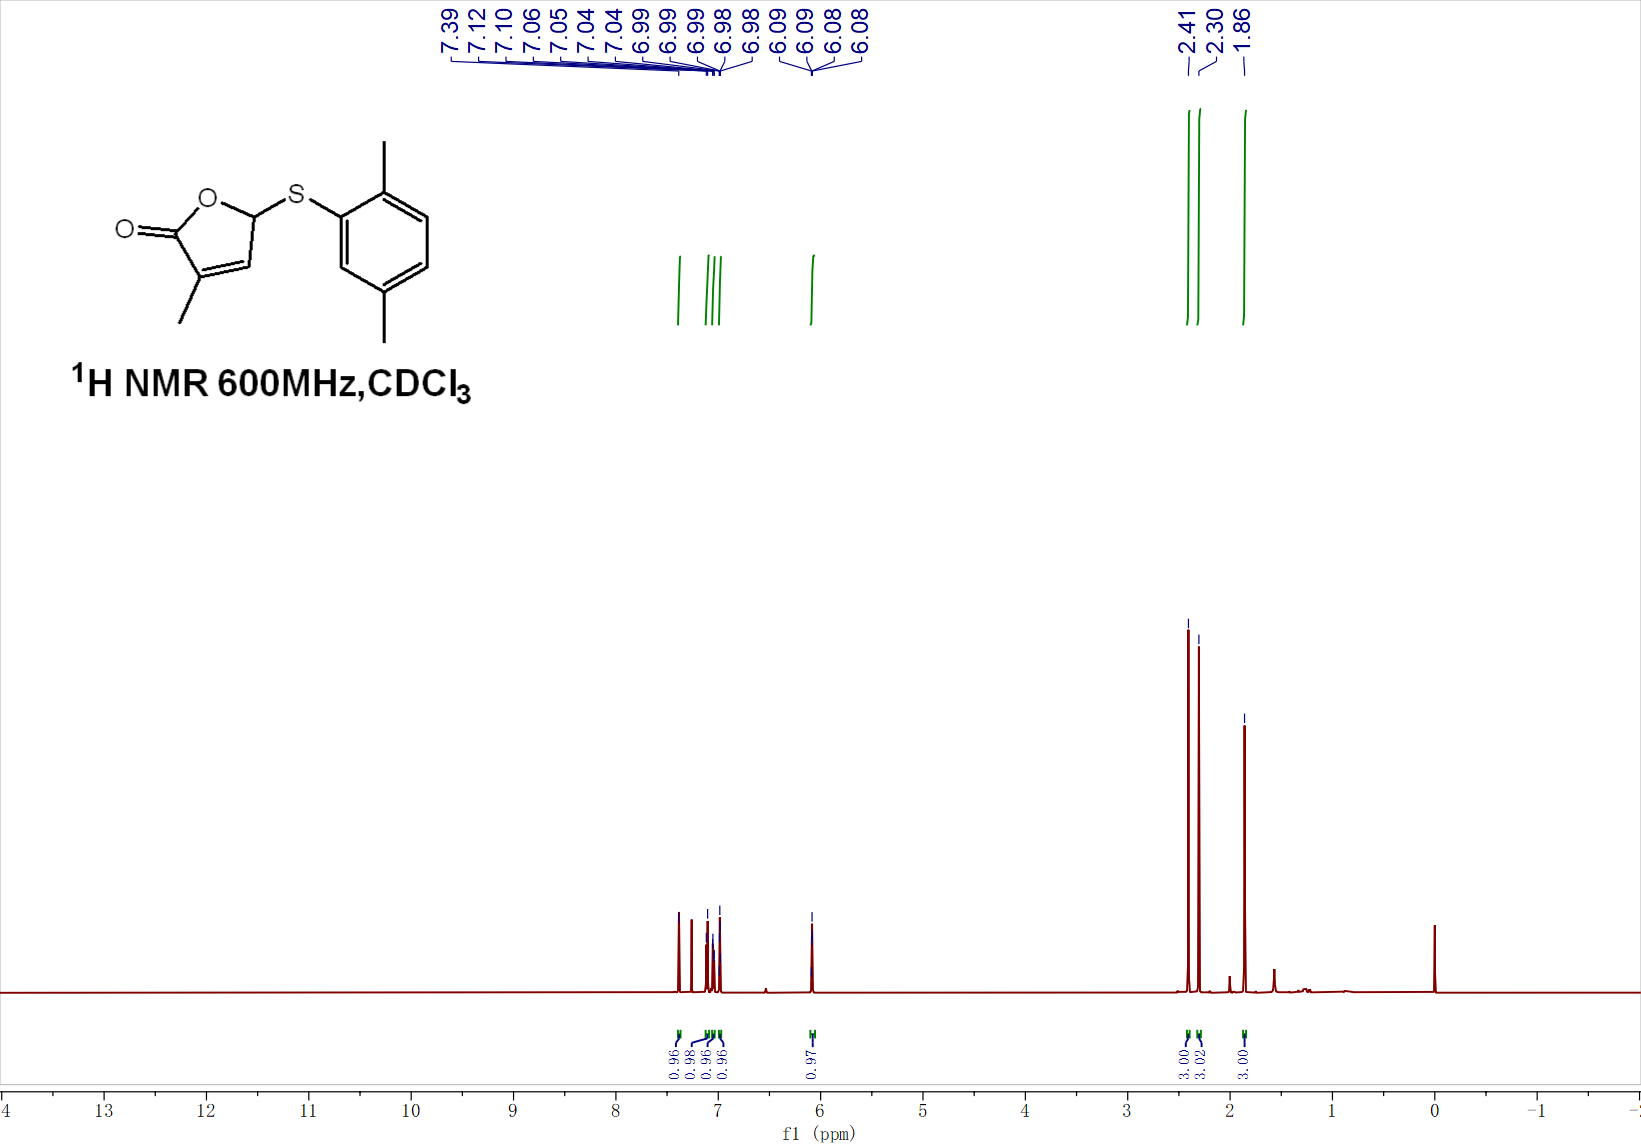


**13C NMR of 4h**


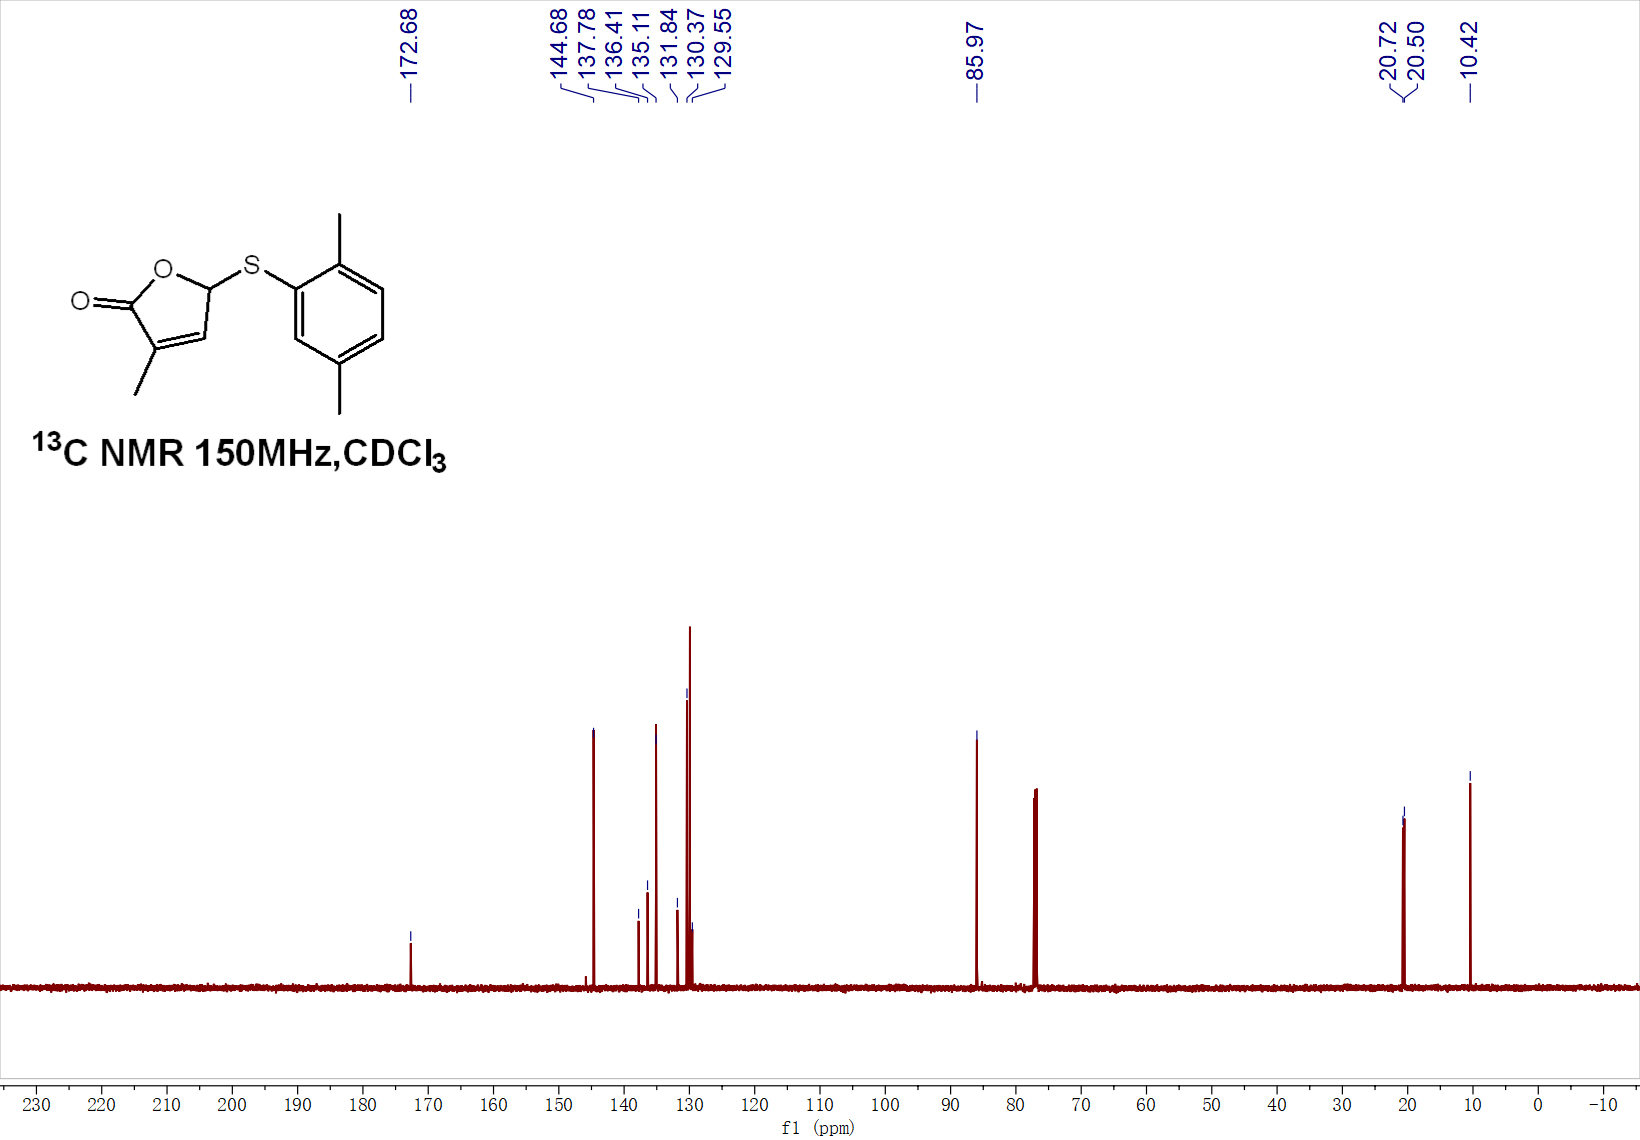


**1H NMR of 4i**


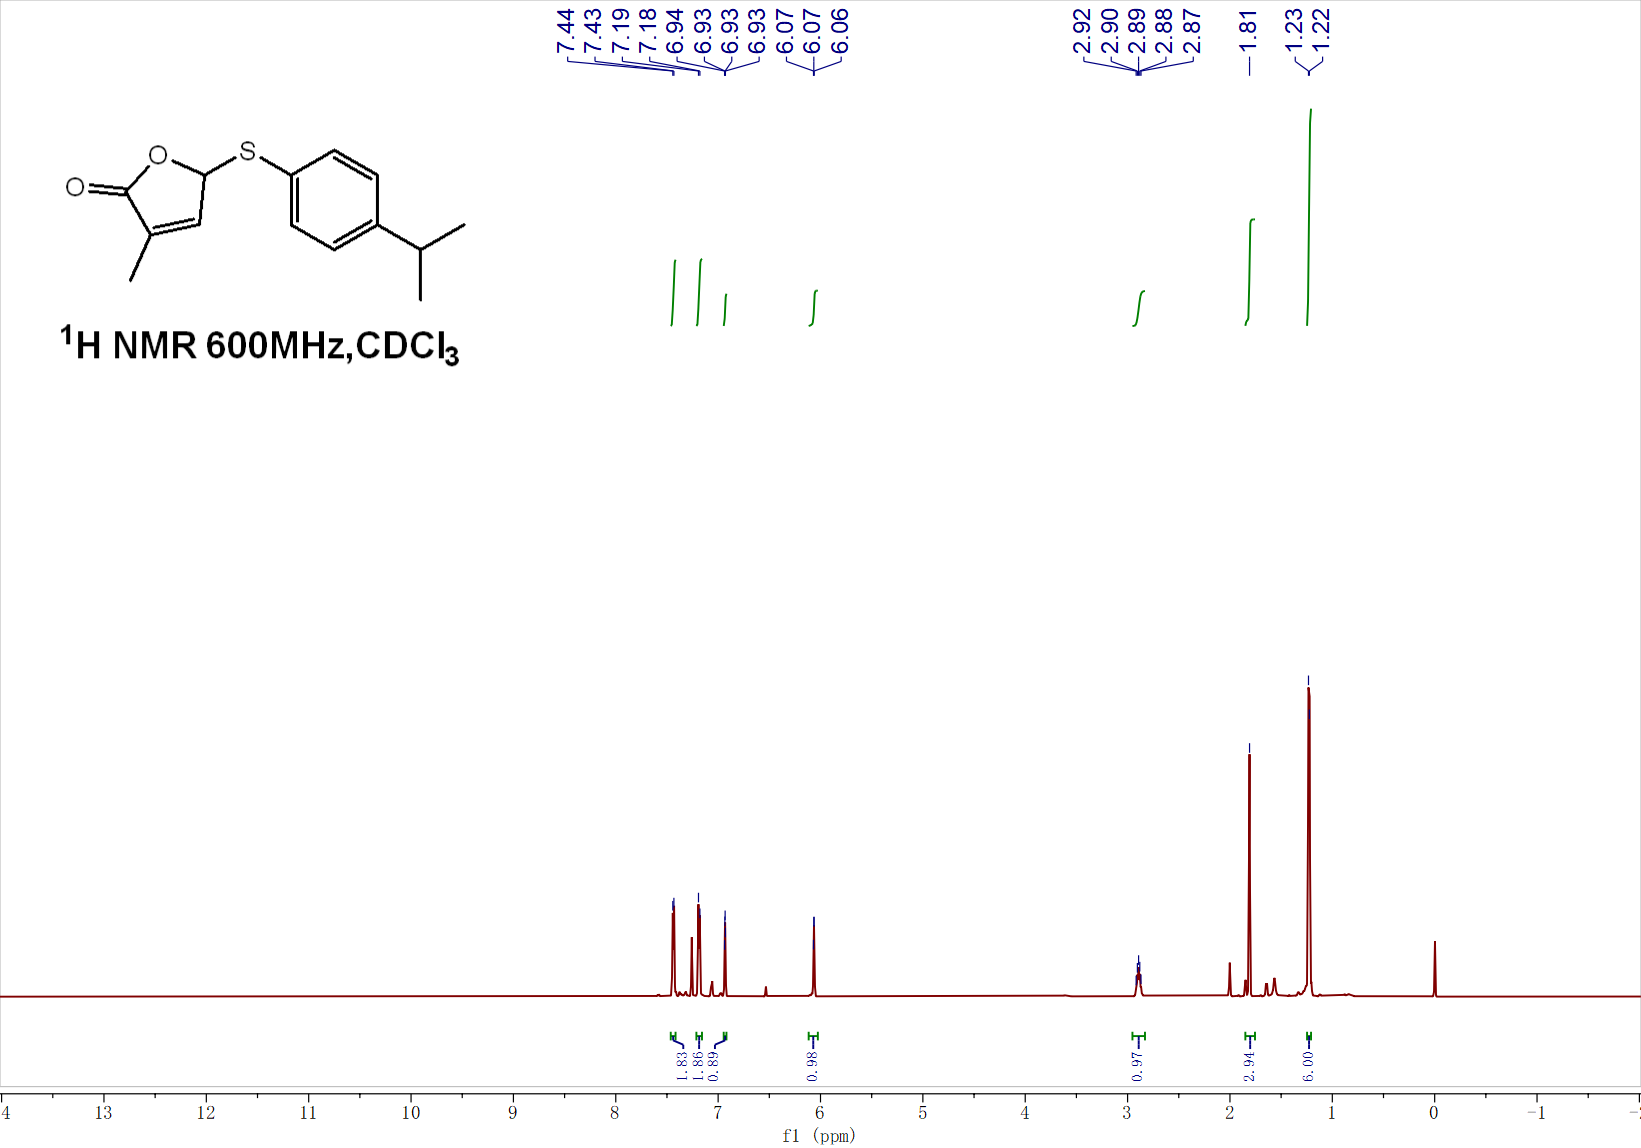


**13C NMR of 4i**


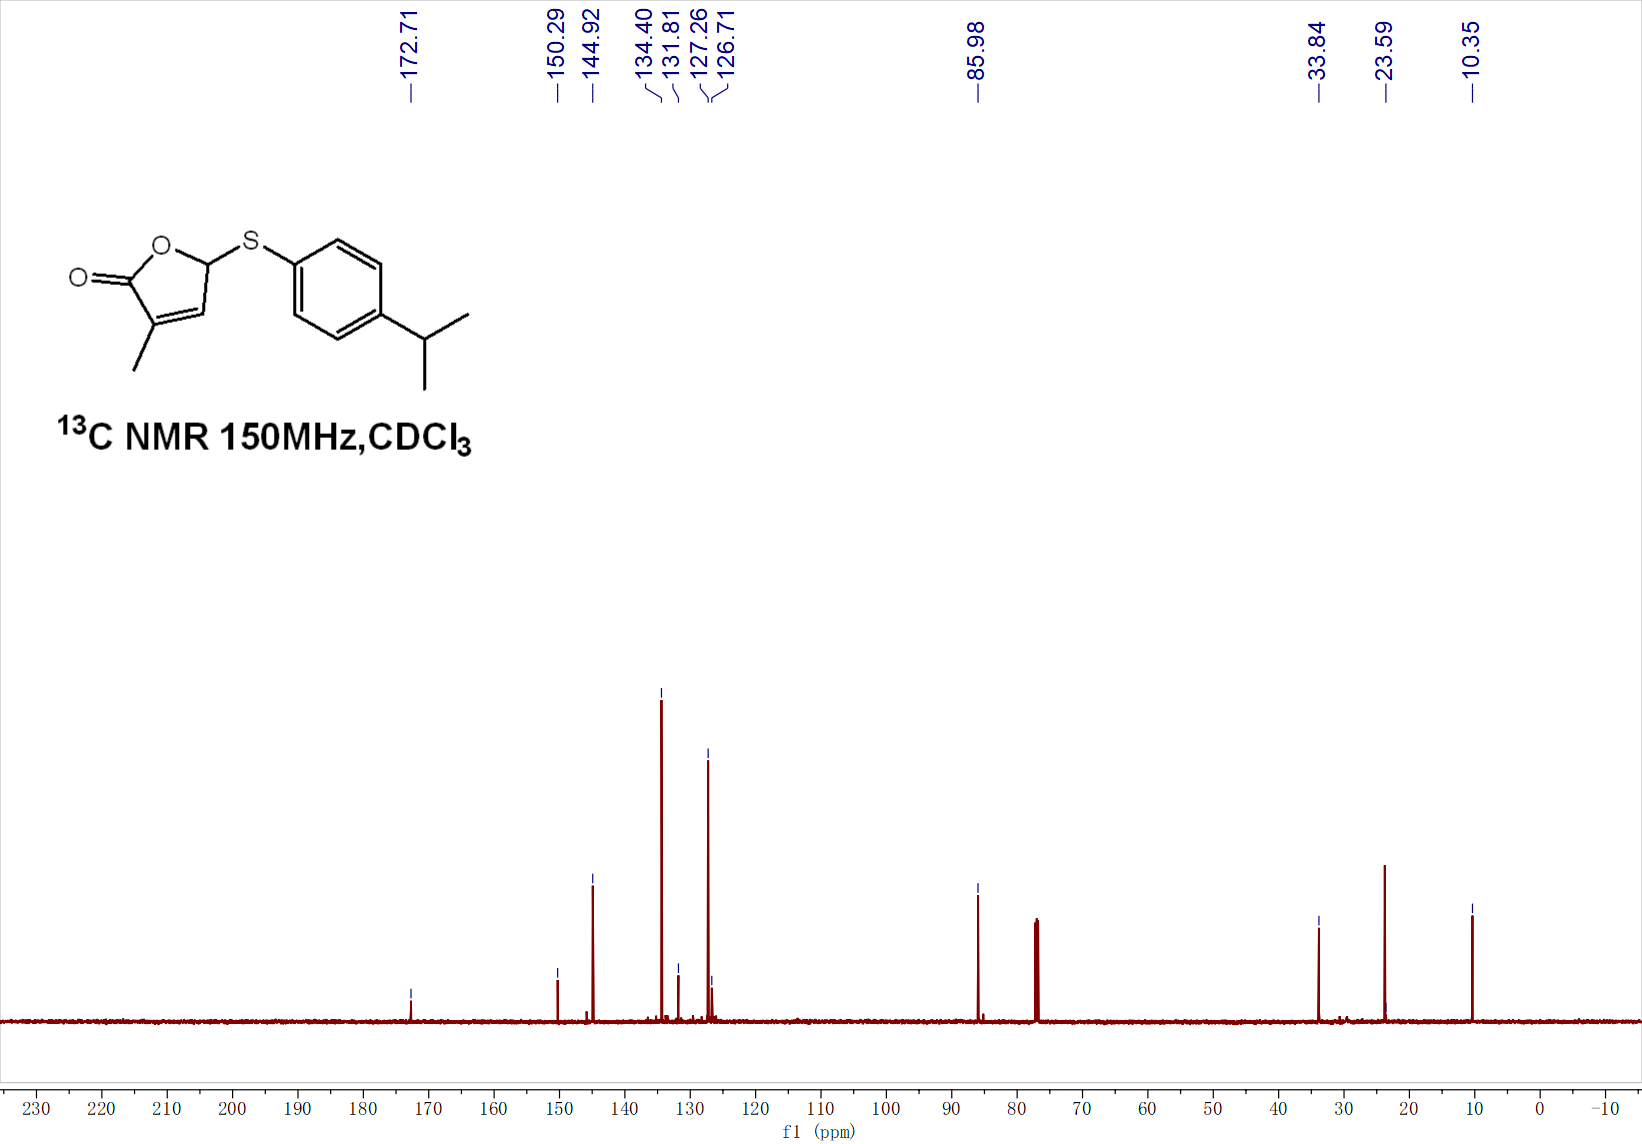

Supplement: Supplementary file 1 [file 309232d1ad18d607ef7e98a4.docx]
